# Supplementary material for: Effects of Methanolic Leaf Extract of <em>Clinacanthus nutans</em> on Fatty Acid Composition and Gene Expression in Male Obese Mice
Source: Preprints.org preprint supplement (doi:10.20944/preprints201804.0232.v2), 2018-04-24
Supplement: Supplementary file 1 [file supplementary]

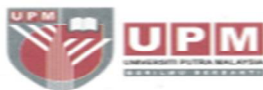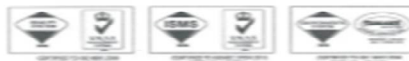

**PEJABAT TIMBALAN NAIB CANCELOR (PENYELIDIKAN DAN INOVASI)**  
OFFICE OF THE DEPUTY VICE CHANCELLOR (RESEARCH AND INNOVATION)

**INSTITUTIONAL ANIMAL CARE AND USE COMMITTEE**

Date: 2 February 2017  
Ref.: UPM/IACUC/AUP- R083/2016  
Project Title: Effects of crude methanolic leaf extract of *Clinacanthus nutans* on male obese mice  
Principal Investigator: Assoc. Prof. Dr. Goh Yong Meng  
Associate: Dr. Mahdi Ebrahimi  
Student: Samiaa Jamil Abdulwahid  
Committee Decision: The committee has reviewed and approved the proposed animal utilization protocol  
AUP No.: R083/2016  
Project Classification: Chronic  
Category of Invasiveness: B  
Source of Animals: A Sapphire Enterprise, 45 Jalan Indah 1/22, Taman University Indah, 43300 Seri Kembangan Selangor  
Number of Animals Approved: 60 Mice  
Accommodation: Animal House, Faculty of Veterinary Medicine, Universiti Putra Malaysia  
Duration: 2 February 2017 – 2 February 2018

  
(PROF. DR. MOHD HAIR BEJO)  
Chairman  
Institutional Animal Care and Use Committee  
Universiti Putra Malaysia

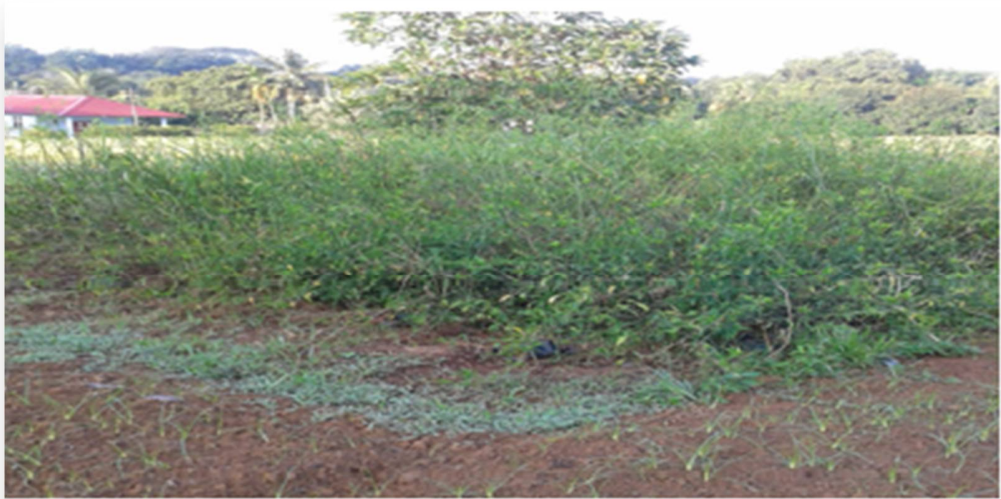

**A**

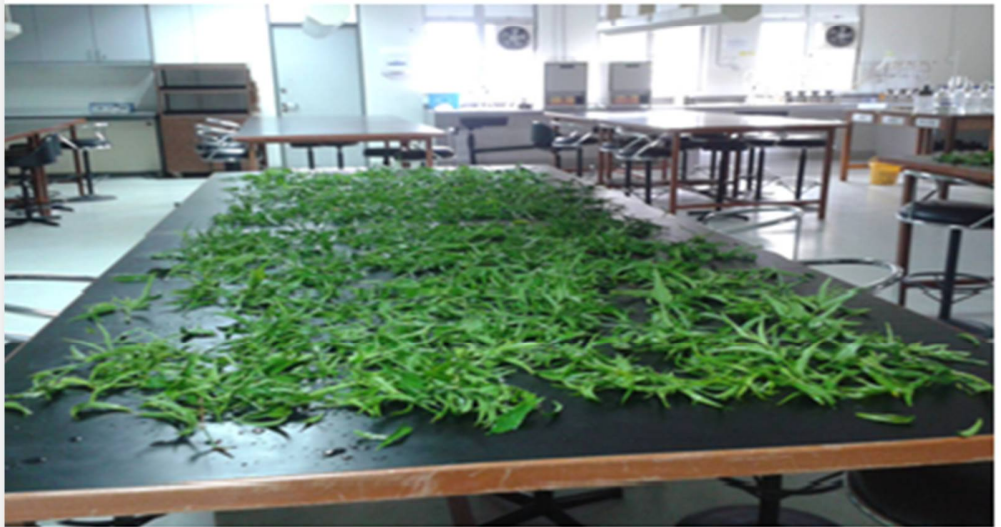

**B**

**Figure 1. A: *C. nutans*; B: washing and drying**

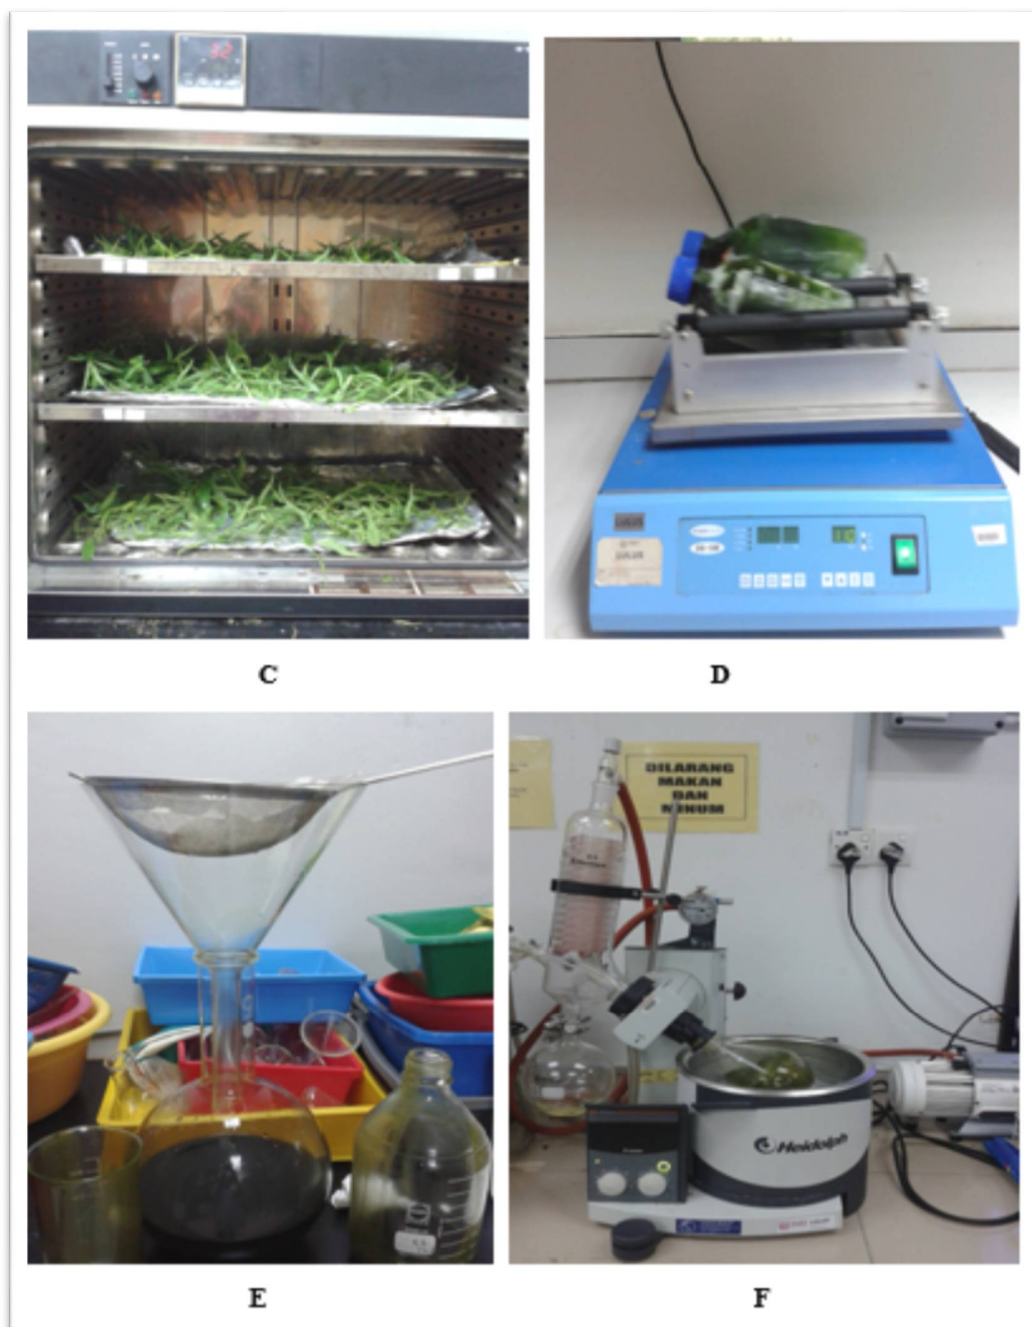

**Figure 2.** *C. nutans* in oven for drying; D: shaking for 72 hours; E: filtration; F: rotary evaporated

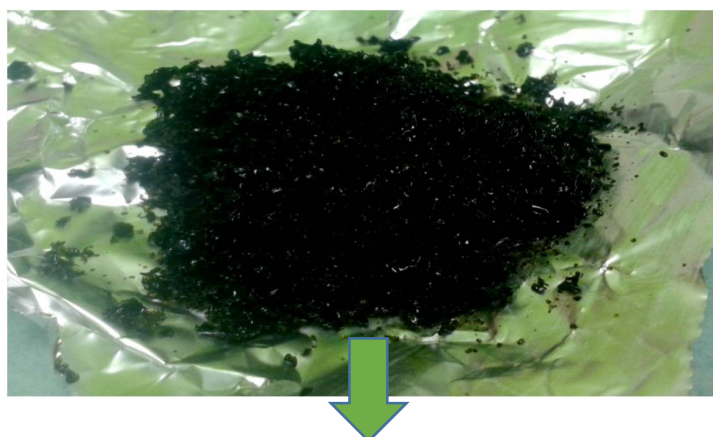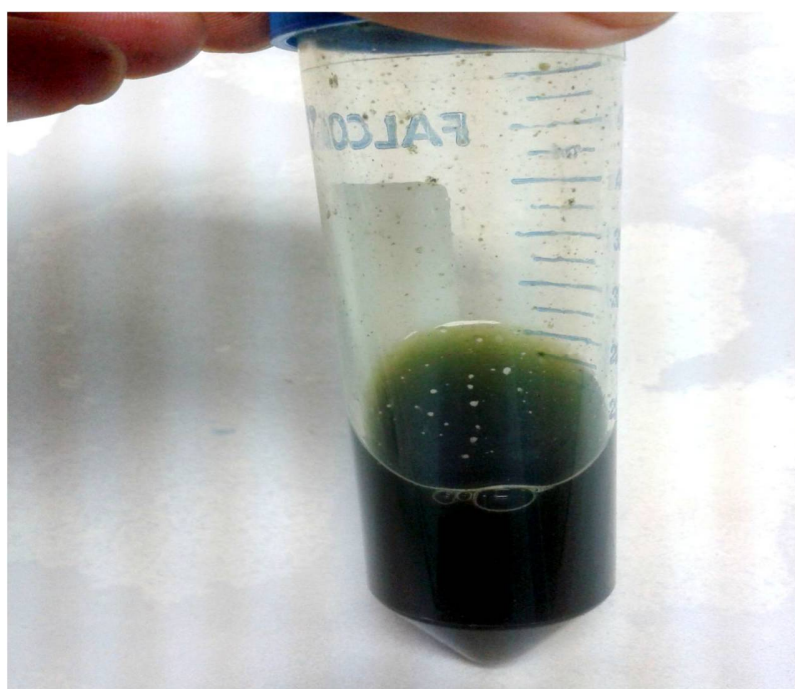

**Figure 3. Preparation of crude methanolic *C. nutans* leaf extract**



**Table 1. Actual concentrations of *C. nutans***

| Nominal concentration (mg/kg) | Actual concentration (mg/ml ) |
|-------------------------------|-------------------------------|
| 500                           | 19.5 (0.122)                  |
| 1000                          | 39 (0.244)                    |
| 1500                          | 58.5 (0.366)                  |

#### **Measurment of the Body Weight**

Weight decrease (g) = initial body weight (g) - final body weight (g).

Furthermore, weight decreased (%) = weight decrease (g) / initial body weight (g)  $\times$  100%.  
This equation was only used at the end of this study.

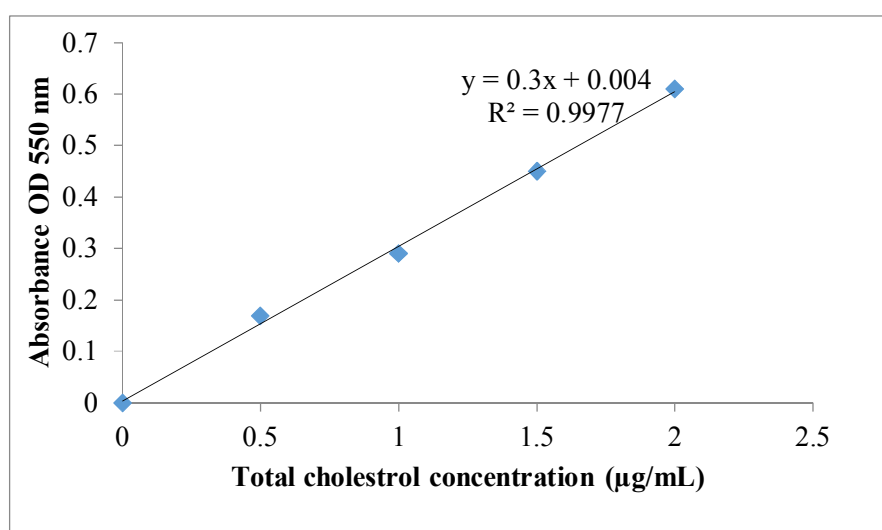

**Figure 4 Cholesterol standard curve**

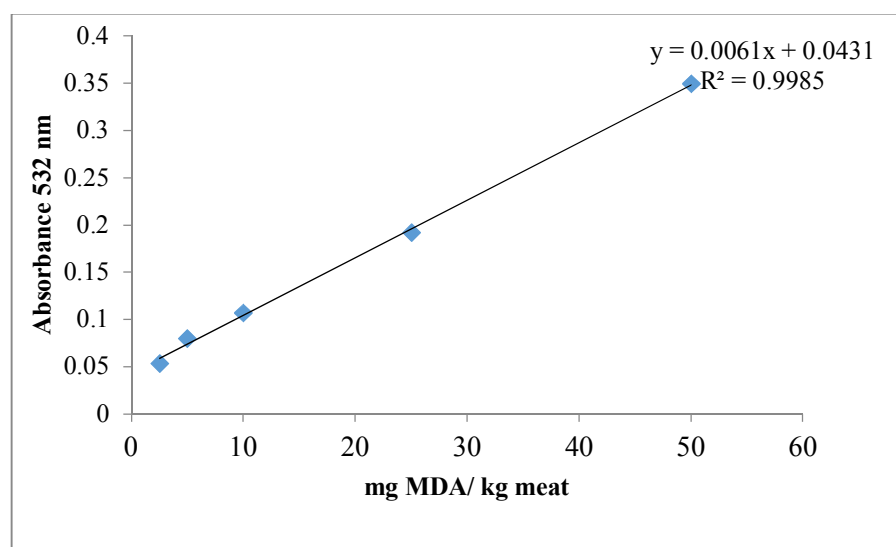

**Figure 5 Standard curve of lipid peroxidation**

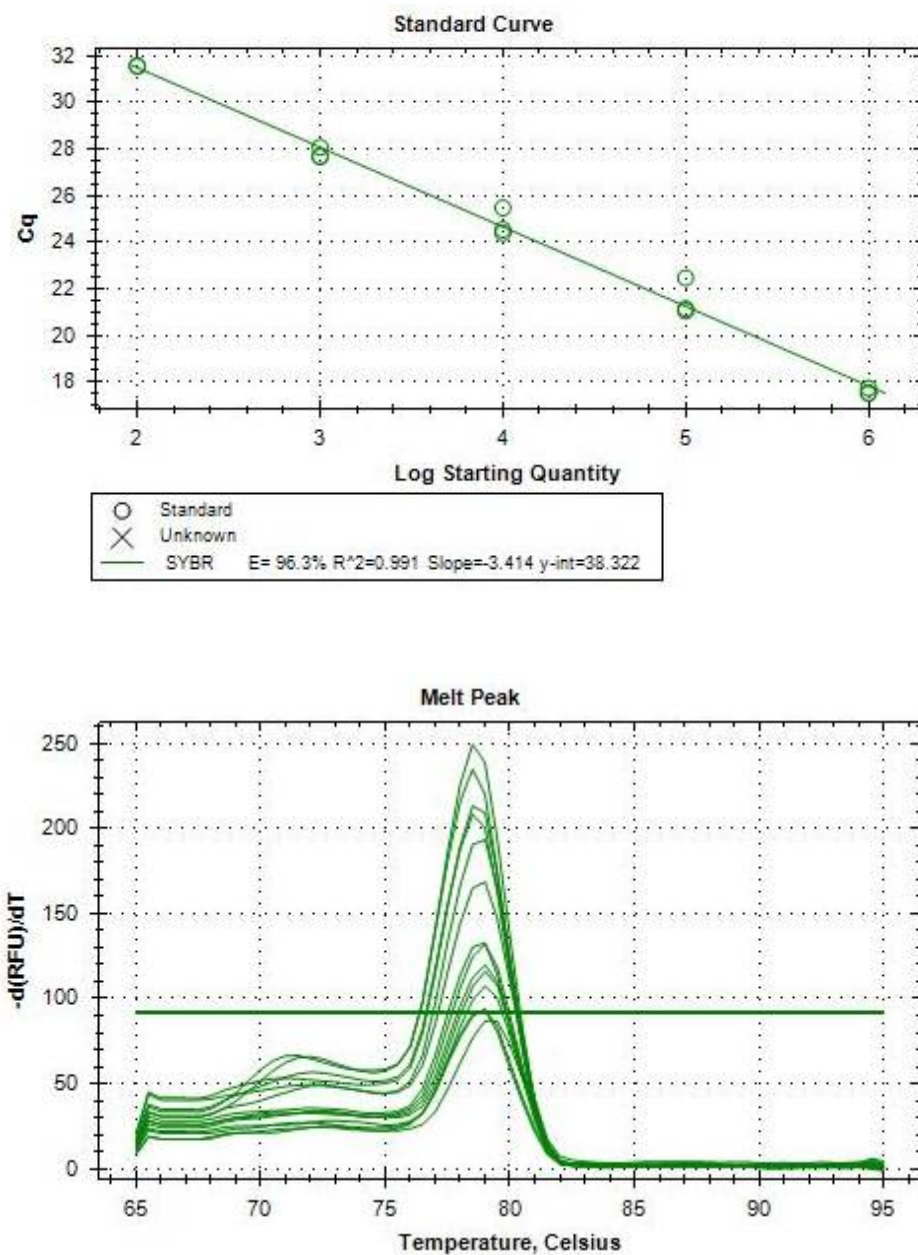

Figure 6 Real time qRT-PCR assay for **β actin** (A) Standard curve for HSL efficiency of HSL= 96.3%, R=0.99, slope =-3.41. (B) Melting peak of **β actin**. A single peak showed single PCR product produced for each diluted of Cdna. The melting temperature of the PCR product is 79.5°C.

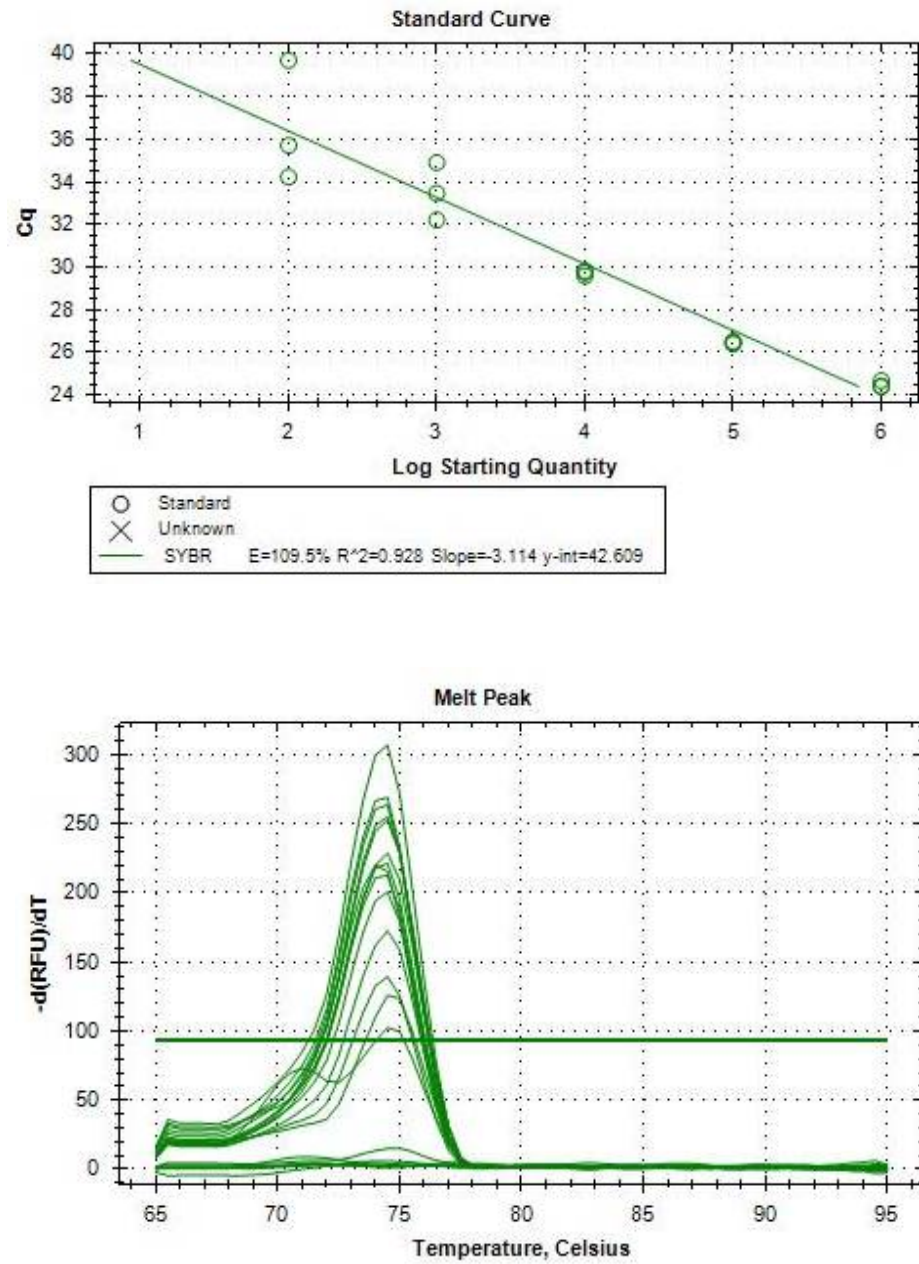

Figure 7 Real time qRT-PCR assay for **PPAR $\alpha$**  (A) Standard curve for **PPAR $\alpha$**  efficiency of **PPAR $\alpha$**  = 109.5%, R=0.92, slope =-3.11. (B) Melting peak of **PPAR $\alpha$** . A single peak showed single PCR product produced for each diluted of Cdna. The melting temperature of the PCR product is 75°C.



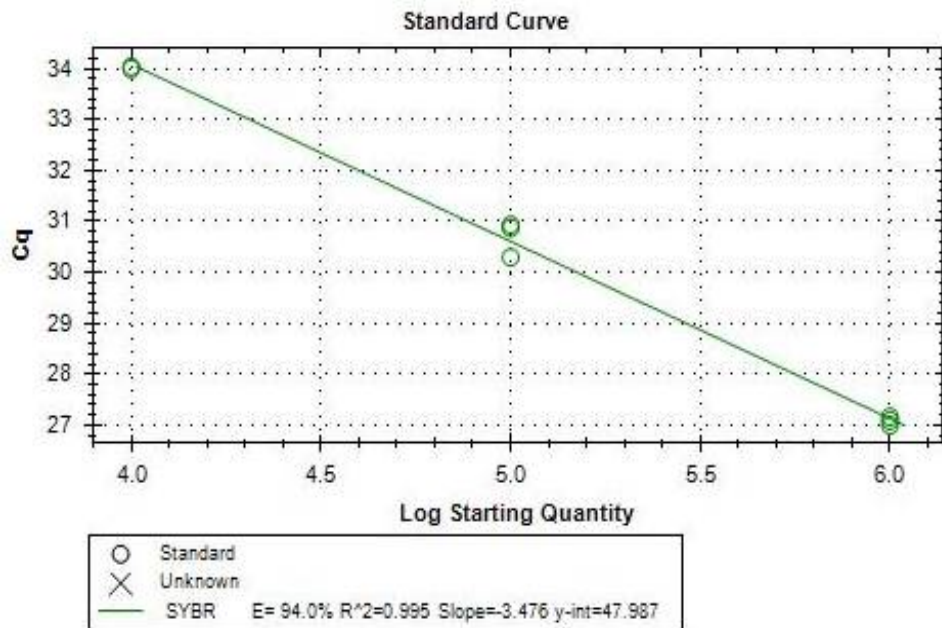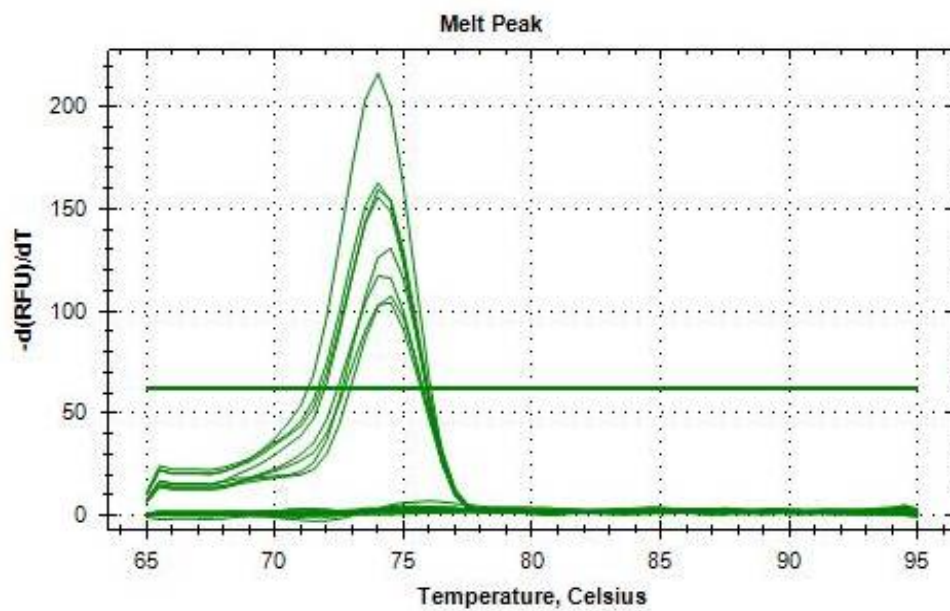

Figure 8 Real time qRT-PCR assay for PPAR $\gamma$  (A) Standard curve for PPAR $\gamma$  efficiency of PPAR $\gamma$ , = 94.0%, R=0.99, slope =-3.47. (B) Melting peak of PPAR $\gamma$ . A single peak showed single PCR product produced for each diluted of cDNA. The melting temperature of the PCR product is 74.5°C.

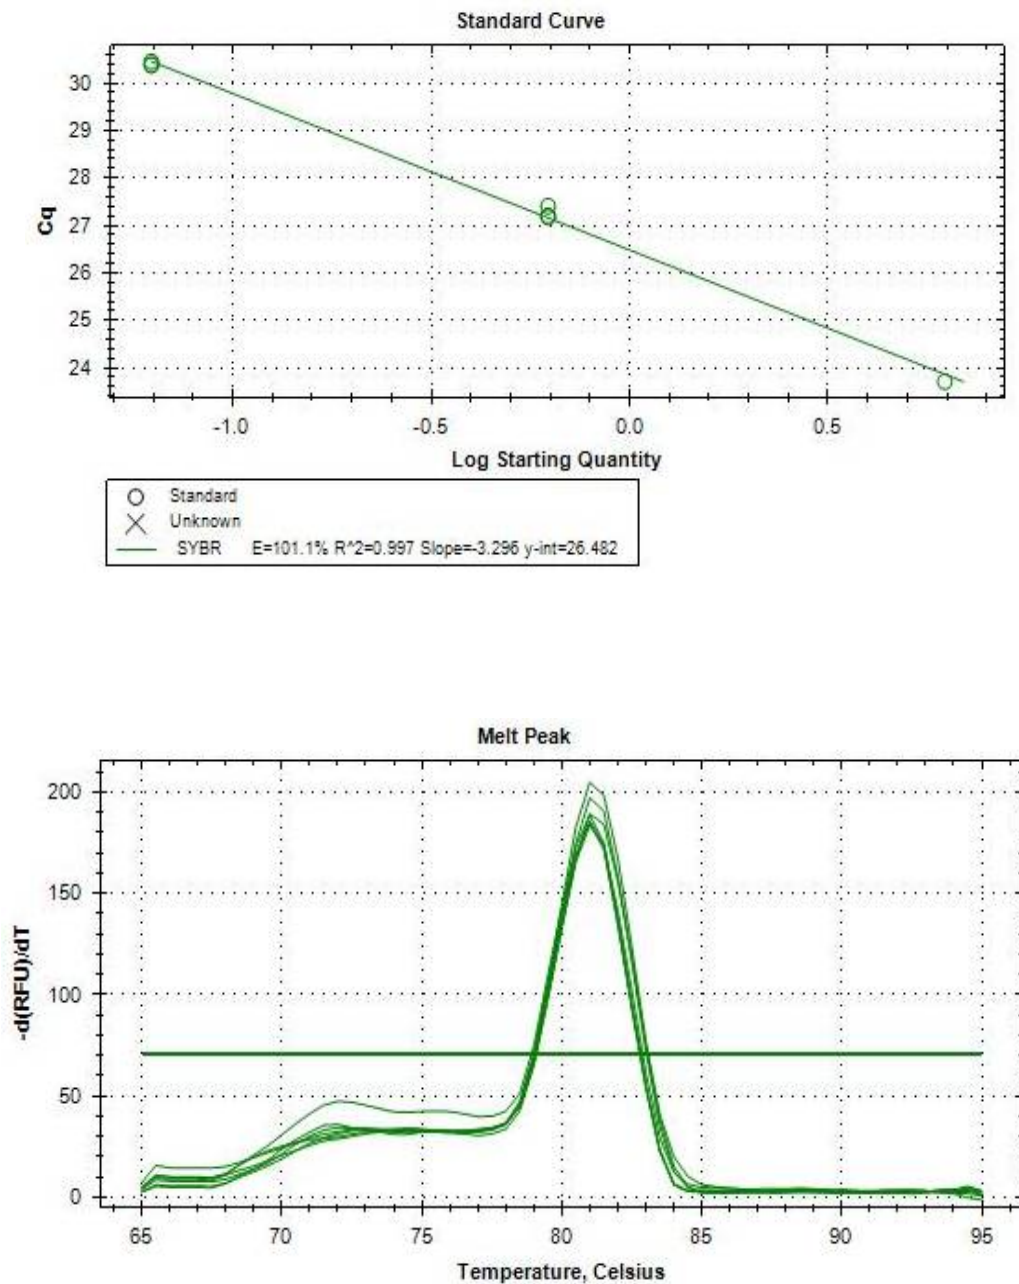

Figure 9 Real time qRT-PCR assay for SREBP<sub>2</sub> (A) Standard curve for SREBP<sub>2</sub>, efficiency of SREBP<sub>2</sub>= 101.1%, R=0.99, slope =-3.29. (B) Melting peak of SREBP<sub>2</sub>. A single peak showed single PCR product produced for each diluted of cDNA. The melting temperature of the PCR product is 74.5°C.

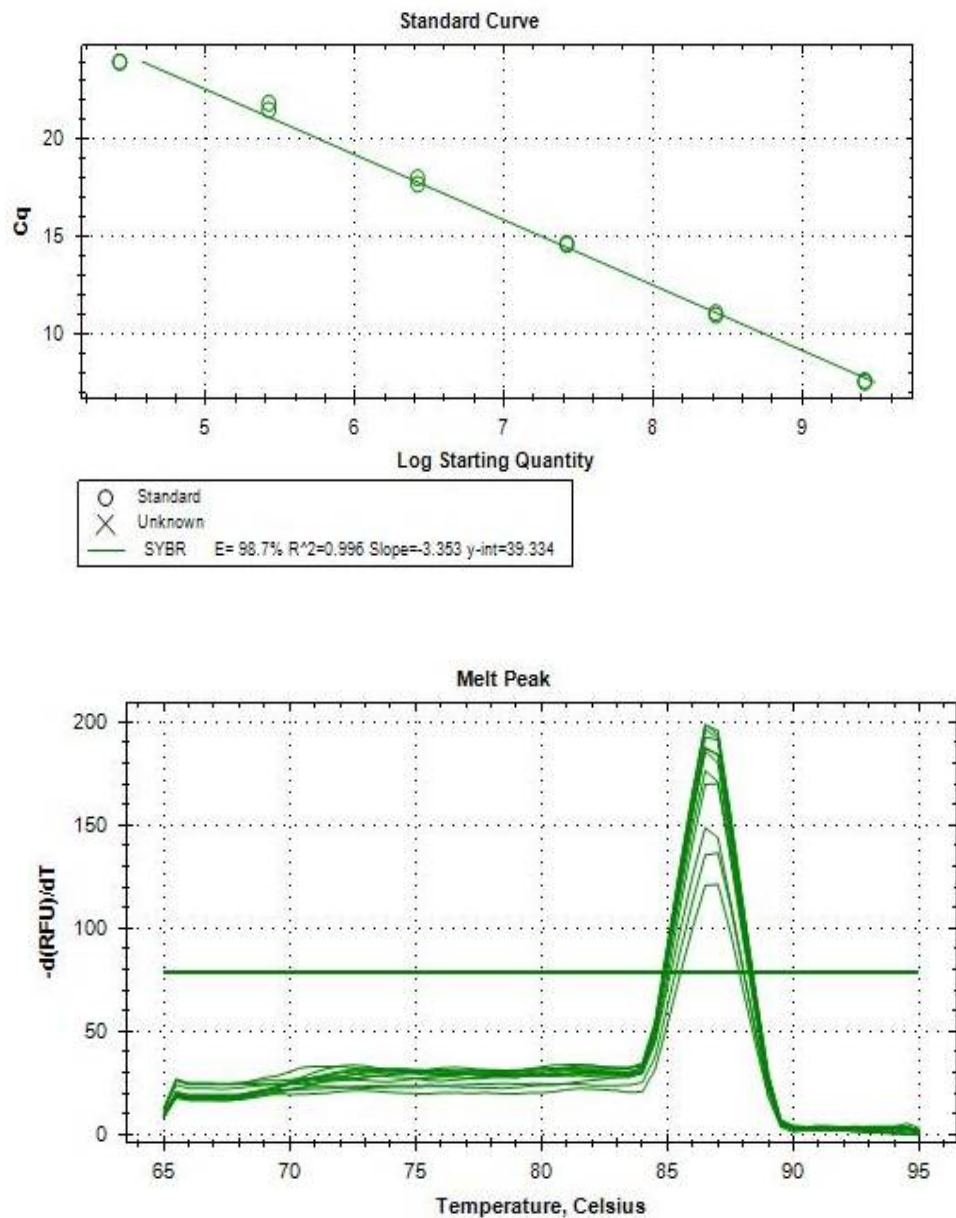

Figure 10 Real time qRT-PCR assay for SCD (A) Standard curve for SCD efficiency of SCD = 98.7%, R=0.99, slope =-3.35.(B) Melting peak of SCD. A single peak showed single PCR product produced for each diluted of Cdna. The melting temperature of the PCR product is 87°C.

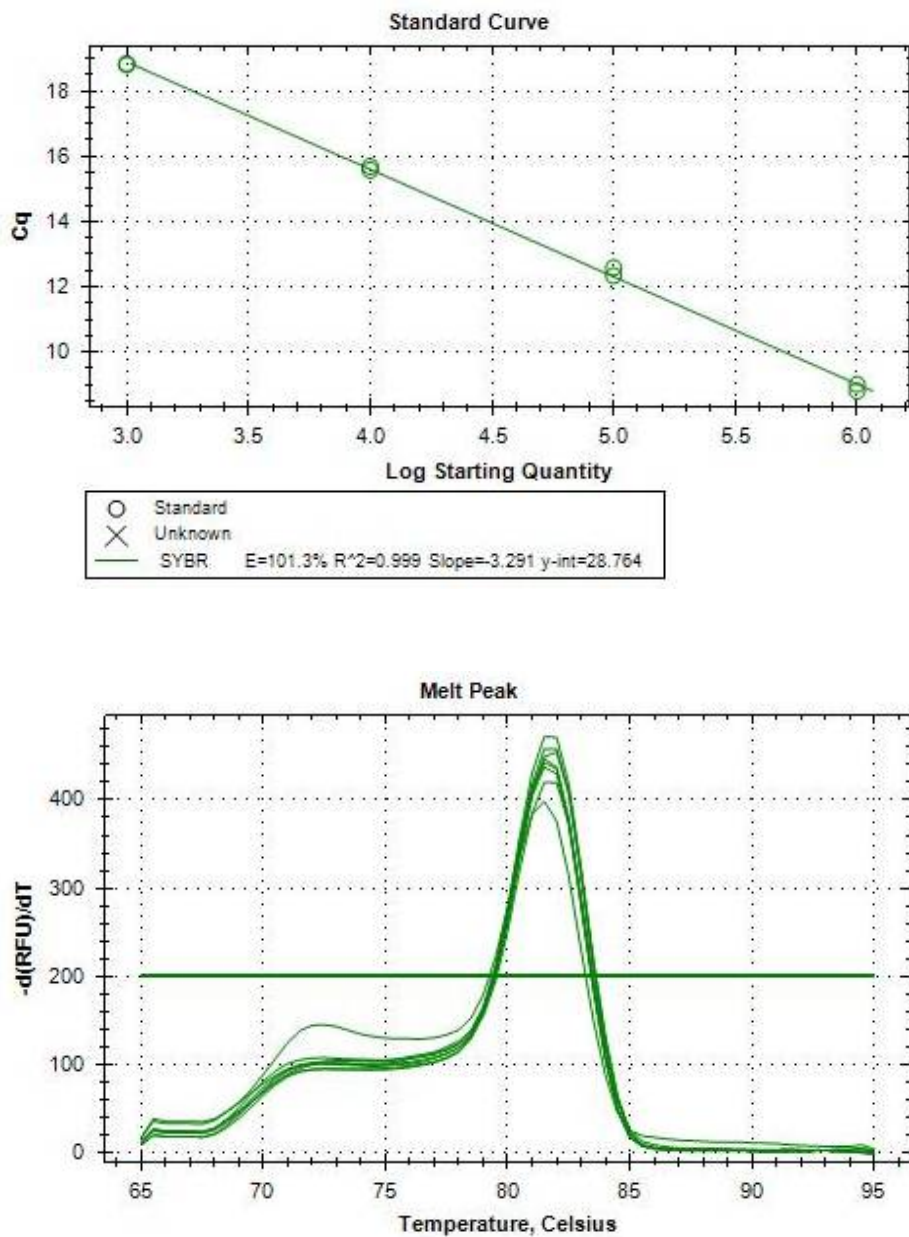

Figure11 Real time Qrt-PCR assay for HSL (A) Standard curve for HSL efficiency of HSL= 101.3%,  $R=0.99$ , slope =-3.291. (B) Melting peak of HSL. A single peak showed single PCR product produced for each diluted of Cdna. The melting temperature of the PCR product is 82°C.



# Sample A=HFD+CN500

Data File C:\CHEM32\1\DATA\SAMIAA FA\SAMIAA FA 2016-05-19 18-00-07\A1.D  
Sample Name: A1

=====

|                 |                        |            |          |
|-----------------|------------------------|------------|----------|
| Acq. Operator   | : Dr Mahdi             | Seq. Line  | : 1      |
| Acq. Instrument | : Instrument 1         | Location   | : Vial 1 |
| Injection Date  | : 5/19/2016 6:02:52 PM | Inj        | : 1      |
|                 |                        | Inj Volume | : 1 µl   |

Acq. Method : C:\CHEM32\1\DATA\SAMIAA FA\SAMIAA FA 2016-05-19 18-00-07\NAZIM FA3.M  
Last changed : 5/16/2016 4:23:12 PM by Dr Mahdi  
Analysis Method : C:\CHEM32\1\METHODS\NAZIM FA3.M  
Last changed : 7/1/2016 11:11:06 AM by Dr Mahdi  
(modified after loading)

Additional Info : Peak(s) manually integrated

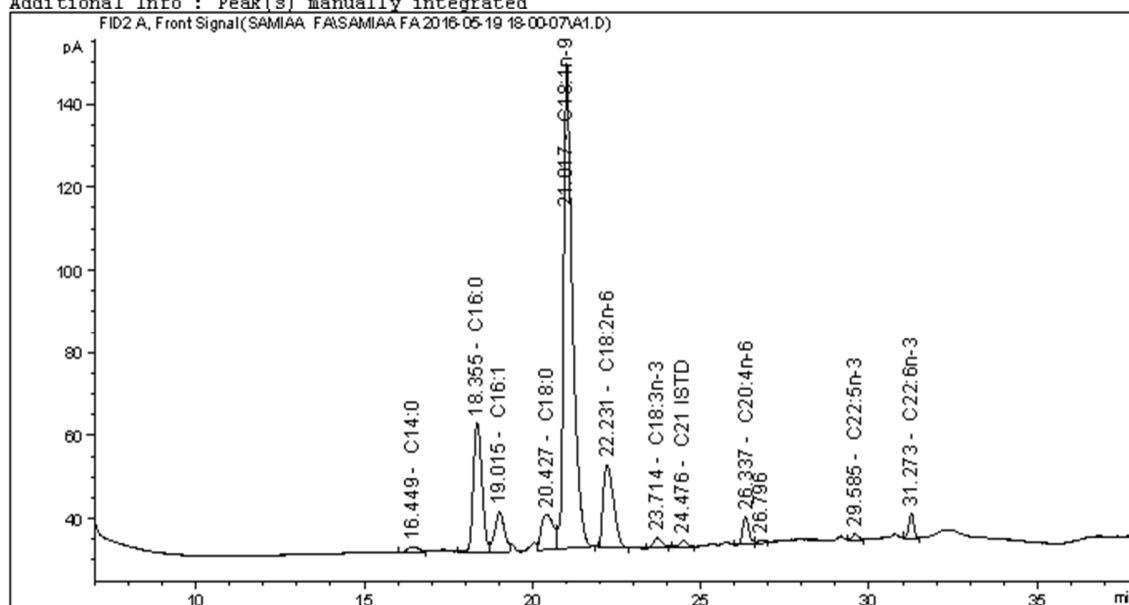

## Area Percent Report

Sorted By : Signal  
Calib. Data Modified : 6/20/2016 4:41:54 PM  
Multiplier: : 1.0000  
Dilution: : 1.0000  
Sample Amount: : 1.00000 [%] (not used in calc.)  
Use Multiplier & Dilution Factor with ISTDs

Signal 1: FID2 A, Front Signal

| Peak # | RetTime [min] | Type | Width [min] | Area [pA*s] | Area %   | Name     |
|--------|---------------|------|-------------|-------------|----------|----------|
| 1      | 16.449        | BV   | 0.2868      | 35.16843    | 0.92334  | C14:0    |
| 2      | 18.355        | VV   | 0.2124      | 550.36731   | 14.44974 | C16:0    |
| 3      | 19.015        | VV   | 0.2319      | 193.00941   | 5.06741  | C16:1    |
| 4      | 20.427        | VV   | 0.2871      | 203.89761   | 5.35327  | C18:0    |
| 5      | 21.017        | VB   | 0.2207      | 2156.92407  | 56.62943 | C18:1n-9 |
| 6      | 22.231        | BB   | 0.2522      | 420.13907   | 11.03063 | C18:2n-6 |
| 7      | 23.714        | BV   | 0.2134      | 42.87360    | 1.12563  | C18:3n-3 |
| 8      | 24.476        | VV   | 0.1947      | 25.75826    | 0.67628  | C21 ISTD |
| 9      | 26.337        | VV   | 0.1543      | 85.60136    | 2.24744  | C20:4n-6 |

Data File C:\CHEM32\1\DATA\SAMIAA FA\SAMIAA FA 2016-05-19 18-00-07\A1.D  
Sample Name: A1

| Peak # | RetTime [min] | Type | Width [min] | Area [pA*s] | Area %  | Name     |
|--------|---------------|------|-------------|-------------|---------|----------|
| 10     | 27.810        |      | 0.0000      | 0.00000     | 0.00000 | C20:5n-3 |
| 11     | 29.585        | VV   | 0.1591      | 21.53872    | 0.56549 | C22:5n-3 |
| 12     | 31.273        | BV   | 0.1281      | 63.77293    | 1.67434 | C22:6n-3 |

Totals : 3799.05078 99.7430

#### 6 Warnings or Errors :

Warning : Calibration warnings (see calibration table listing)  
Warning : Calibrated compound(s) not found  
Warning : Invalid calibration curve, (C21:1STD)  
Warning : Invalid calibration curve, (C20:4n-6)  
Warning : Invalid calibration curve, (C22:5n-3)  
Warning : Invalid calibration curve, (C22:6n-3)

#### Summed Peaks Report

Signal 1: FID2 A, Front Signal

#### Final Summed Peaks Report

Signal 1: FID2 A, Front Signal

\*\*\* End of Report \*\*\*

Data File C:\CHEM32\1\DATA\SAMIAA FA\SAMIAA FA 2016-05-19 18-00-07\A3.D  
Sample Name: A3

```
=====
Acq. Operator   : Dr Mahdi                      Seg. Line :    3
Acq. Instrument : Instrument 1                  Location  : Vial 3
Injection Date  : 5/19/2016 7:28:21 PM          Inj       :    1
                                           Inj Volume: 1 µl
Acq. Method     : C:\CHEM32\1\DATA\SAMIAA FA\SAMIAA FA 2016-05-19 18-00-07\NAZIM FA3.M
Last changed    : 5/16/2016 4:23:12 PM by Dr Mahdi
Analysis Method : C:\CHEM32\1\METHODS\NAZIM FA3.M
Last changed    : 7/1/2016 11:11:06 AM by Dr Mahdi
                  (modified after loading)
Additional Info : Peak(s) manually integrated
```

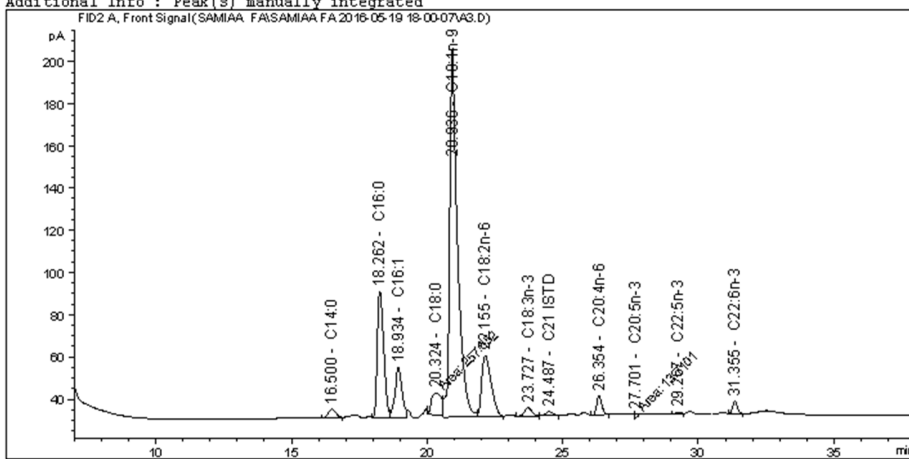

#### Area Percent Report

```
=====
Sorted By      : Signal
Calib. Data Modified : 6/20/2016 4:41:54 PM
Multiplier:    : 1.0000
Dilution:      : 1.0000
Sample Amount: : 1.00000 [%] (not used in calc.)
Use Multiplier & Dilution Factor with ISTDs
```

Signal 1: FID2 A, Front Signal

| Peak # | RetTime [min] | Type | Width [min] | Area [pA*s] | Area %   | Name     |
|--------|---------------|------|-------------|-------------|----------|----------|
| 1      | 16.500        | BV   | 0.2402      | 85.36057    | 1.35960  | C14:0    |
| 2      | 18.262        | VV   | 0.1970      | 993.03131   | 15.81668 | C16:0    |
| 3      | 18.934        | VV   | 0.2132      | 426.34695   | 6.79072  | C16:1    |
| 4      | 20.324        | MM   | 0.4122      | 257.65176   | 4.10379  | C18:0    |
| 5      | 20.936        | VB   | 0.2437      | 3489.70068  | 55.58284 | C18:1n-9 |
| 6      | 22.155        | BV   | 0.2837      | 701.67816   | 11.17611 | C18:2n-6 |
| 7      | 23.727        | VV   | 0.2157      | 71.34158    | 1.13631  | C18:3n-3 |
| 8      | 24.487        | VV   | 0.2063      | 37.10663    | 0.59102  | C21:ISTD |
| 9      | 26.354        | VV   | 0.1600      | 115.74066   | 1.84348  | C20:4n-6 |

Instrument 1 7/1/2016 11:12:27 AM Dr Mahdi

Page 1 of 2

Data File C:\CHEM32\1\DATA\SAMIAA FA\SAMIAA FA 2016-05-19 18-00-07\A3.D  
Sample Name: A3

| Peak # | RetTime [min] | Type | Width [min] | Area [pA*s] | Area %  | Name     |
|--------|---------------|------|-------------|-------------|---------|----------|
| 10     | 27.701        | MM   | 0.1232      | 13.71011    | 0.21837 | C20:5n-3 |
| 11     | 29.267        | VV   | 0.1621      | 11.56752    | 0.18424 | C22:5n-3 |
| 12     | 31.355        | VV   | 0.1474      | 75.14233    | 1.19684 | C22:6n-3 |

Totals : 6278.37827 100.0000

# 6 Warnings or Errors :

Warning : Calibration warnings (see calibration table listing)  
Warning : Invalid calibration curve, (C21:1STD)  
Warning : Invalid calibration curve, (C20:4n-6)  
Warning : Invalid calibration curve, (C20:5n-3)  
Warning : Invalid calibration curve, (C22:5n-3)  
Warning : Invalid calibration curve, (C22:6n-3)

# Summed Peaks Report

Signal 1: FID2 A, Front Signal

# Final Summed Peaks Report

Signal 1: FID2 A, Front Signal  
\*\*\* End of Report \*\*\*



Data File C:\CHEM32\1\DATA\SAMIAA FA\SAMIAA FA 2016-05-19 18-00-07\A4.D  
Sample Name: A4

```
=====
Acq. Operator   : Dr Mahdi                      Seq. Line :    4
Acq. Instrument : Instrument 1                  Location  : Vial 4
Injection Date  : 5/19/2016 8:11:03 PM          Inj       :    1
                                           Inj Volume: 1 µl
Acq. Method     : C:\CHEM32\1\DATA\SAMIAA FA\SAMIAA FA 2016-05-19 18-00-07\NAZIM FA3.M
Last changed    : 5/16/2016 4:23:12 PM by Dr Mahdi
Analysis Method : C:\CHEM32\1\METHODS\NAZIM FA3.M
Last changed    : 7/1/2016 11:11:06 AM by Dr Mahdi
                (modified after loading)
Additional Info : Peak(s) manually integrated
```

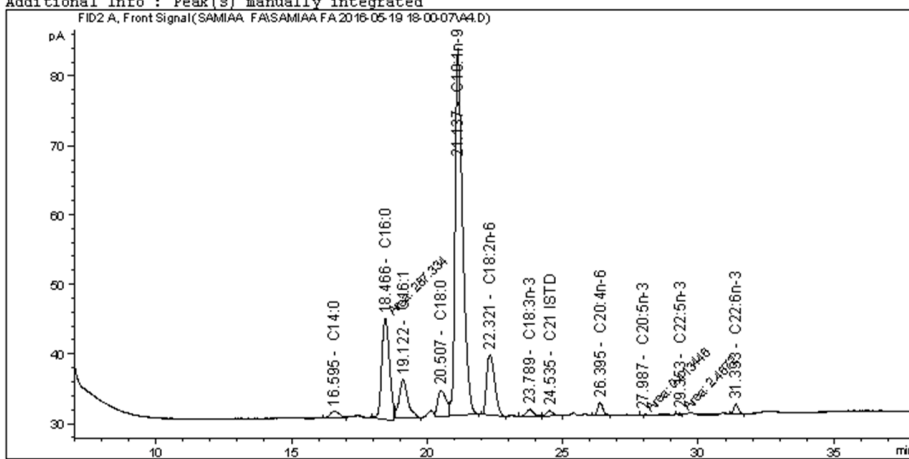

#### Area Percent Report

```
=====
Sorted By      : Signal
Calib. Data Modified : 6/20/2016 4:41:54 PM
Multiplier:     : 1.0000
Dilution:       : 1.0000
Sample Amount:  : 1.00000 [%] (not used in calc.)
Use Multiplier & Dilution Factor with ISTDs
```

Signal 1: FID2 A, Front Signal

| Peak # | RetTime [min] | Type | Width [min] | Area [pA*s] | Area %   | Name     |
|--------|---------------|------|-------------|-------------|----------|----------|
| 1      | 16.595        | BV   | 0.2818      | 24.19019    | 1.35984  | C14:0    |
| 2      | 18.466        | MM   | 0.3296      | 287.33365   | 16.15226 | C16:0    |
| 3      | 19.122        | VB   | 0.2634      | 119.41744   | 6.71297  | C16:1    |
| 4      | 20.507        | VV   | 0.2525      | 80.03360    | 4.49903  | C18:0    |
| 5      | 21.137        | VB   | 0.2282      | 1016.17047  | 57.12333 | C18:1n-9 |
| 6      | 22.321        | BB   | 0.2415      | 177.37985   | 9.97129  | C18:2n-6 |
| 7      | 23.789        | VV   | 0.2154      | 17.60420    | 0.98961  | C18:3n-3 |
| 8      | 24.535        | VV   | 0.2033      | 12.16496    | 0.68385  | C21 ISTD |
| 9      | 26.395        | VB   | 0.1557      | 23.94263    | 1.34592  | C20:4n-6 |

Instrument 1 7/1/2016 11:12:50 AM Dr Mahdi

Page 1 of 2

Data File C:\CHEM32\1\DATA\SAMIAA FA\SAMIAA FA 2016-05-19 18-00-07\A4.D  
Sample Name: A4

| Peak # | RetTime [min] | Type | Width [min] | Area [pA*s] | Area %  | Name     |
|--------|---------------|------|-------------|-------------|---------|----------|
| 10     | 27.987        | MM   | 0.0448      | 4.13446e-1  | 0.02324 | C20:5n-3 |
| 11     | 29.353        | MM   | 0.1371      | 2.46720     | 0.13869 | C22:5n-3 |
| 12     | 31.393        | VV   | 0.1502      | 17.78863    | 0.99998 | C22:6n-3 |

Totals : 1778.90627 100.0000

#### 6 Warnings or Errors :

Warning : Calibration warnings (see calibration table listing)  
Warning : Invalid calibration curve, (C21 ISTD)  
Warning : Invalid calibration curve, (C20:4n-6)  
Warning : Invalid calibration curve, (C20:5n-3)  
Warning : Invalid calibration curve, (C22:5n-3)  
Warning : Invalid calibration curve, (C22:6n-3)

#### Summed Peaks Report

Signal 1: FID2 A, Front Signal

#### Final Summed Peaks Report

Signal 1: FID2 A, Front Signal

\*\*\* End of Report \*\*\*

Data File C:\CHEM32\1\DATA\SAMIAA FA\SAMIAA FA 2016-05-19 18-00-07\A5.D  
Sample Name: A5

=====

|                                                                                    |                   |
|------------------------------------------------------------------------------------|-------------------|
| Acq. Operator : Dr Mahdi                                                           | Seq. Line : 5     |
| Acq. Instrument : Instrument 1                                                     | Location : Vial 5 |
| Injection Date : 5/19/2016 8:53:51 PM                                              | Inj : 1           |
|                                                                                    | Ini Volume : 1 ul |
| Acq. Method : C:\CHEM32\1\DATA\SAMIAA FA\SAMIAA FA 2016-05-19 18-00-07\NAZIM FA3.M |                   |
| Last changed : 5/16/2016 4:23:12 PM by Dr Mahdi                                    |                   |
| Analysis Method : C:\CHEM32\1\METHODS\NAZIM FA3.M                                  |                   |
| Last changed : 7/1/2016 11:11:06 AM by Dr Mahdi                                    |                   |
| (modified after loading)                                                           |                   |

Additional Info : Peak(s) manually integrated

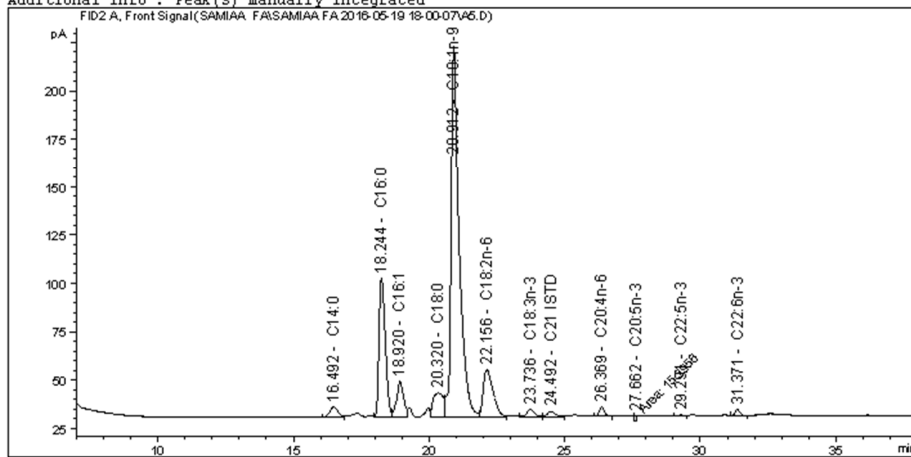

Area Percent Report

Sorted By : Signal  
Calib. Data Modified : 6/20/2016 4:41:54 PM  
Multiplier: : 1.0000  
Dilution: : 1.0000  
Sample Amount: : 1.00000 [%] (not used in calc.)  
Use Multiplier & Dilution Factor with ISTDs

Signal 1: FID2 A, Front Signal

| Peak # | RetTime [min] | Type | Width [min] | Area [pA*s] | Area %   | Name     |
|--------|---------------|------|-------------|-------------|----------|----------|
| 1      | 16.492        | BV   | 0.2410      | 105.07143   | 1.56499  | C14:0    |
| 2      | 18.244        | VV   | 0.1898      | 1157.21497  | 17.23615 | C16:0    |
| 3      | 18.920        | VV   | 0.2107      | 326.25220   | 4.85937  | C16:1    |
| 4      | 20.320        | VV   | 0.3016      | 313.92719   | 4.67579  | C18:0    |
| 5      | 20.912        | VB   | 0.2450      | 3956.68311  | 58.93285 | C18:1n-9 |
| 6      | 22.156        | BV   | 0.2977      | 608.21600   | 9.05908  | C18:2n-6 |
| 7      | 23.736        | VV   | 0.2265      | 69.72490    | 1.03852  | C18:3n-3 |
| 8      | 24.492        | VV   | 0.2228      | 51.43192    | 0.76605  | C21:1STD |
| 9      | 26.369        | VV   | 0.1563      | 62.50320    | 0.93095  | C20:4n-6 |

Instrument 1 7/1/2016 11:13:04 AM Dr Mahdi

Page 1 of 2

Data File C:\CHEM32\1\DATA\SAMIAA FA\SAMIAA FA 2016-05-19 18-00-07\A5.D  
Sample Name: A5

| Peak<br># | RetTime<br>[min] | Type | Width<br>[min] | Area<br>[pA*s] | Area<br>% | Name     |
|-----------|------------------|------|----------------|----------------|-----------|----------|
| 10        | 27.662           | MM   | 0.1132         | 15.39559       | 0.22931   | C20:5n-3 |
| 11        | 29.291           | BV   | 0.1703         | 7.83141        | 0.11664   | C22:5n-3 |
| 12        | 31.371           | BV   | 0.1512         | 39.63202       | 0.59030   | C22:6n-3 |

Totals : 6713.88392 100.0000

6 Warnings or Errors :

Warning : Calibration warnings (see calibration table listing)  
Warning : Invalid calibration curve, (C21 ISTD)  
Warning : Invalid calibration curve, (C20:4n-6)  
Warning : Invalid calibration curve, (C20:5n-3)  
Warning : Invalid calibration curve, (C22:5n-3)  
Warning : Invalid calibration curve, (C22:6n-3)

=====

Summed Peaks Report

=====

Signal 1: FID2 A, Front Signal

=====

Final Summed Peaks Report

=====

Signal 1: FID2 A, Front Signal

\*\*\* End of Report \*\*\*



Data File C:\CHEM32\1\DATA\SAMIAA FA\SAMIAA FA 2016-05-19 18-00-07\A6.D  
Sample Name: A6

=====

|                                                                                    |                   |
|------------------------------------------------------------------------------------|-------------------|
| Acq. Operator : Dr Mahdi                                                           | Seq. Line : 6     |
| Acq. Instrument : Instrument 1                                                     | Location : Vial 6 |
| Injection Date : 5/19/2016 9:36:34 PM                                              | Inj : 1           |
|                                                                                    | Ini Volume : 1 ul |
| Acq. Method : C:\CHEM32\1\DATA\SAMIAA FA\SAMIAA FA 2016-05-19 18-00-07\NAZIM FA3.M |                   |
| Last changed : 5/16/2016 4:23:12 PM by Dr Mahdi                                    |                   |
| Analysis Method : C:\CHEM32\1\METHODS\NAZIM FA3.M                                  |                   |
| Last changed : 7/1/2016 11:11:06 AM by Dr Mahdi                                    |                   |
| (modified after loading)                                                           |                   |

Additional Info : Peak(s) manually integrated

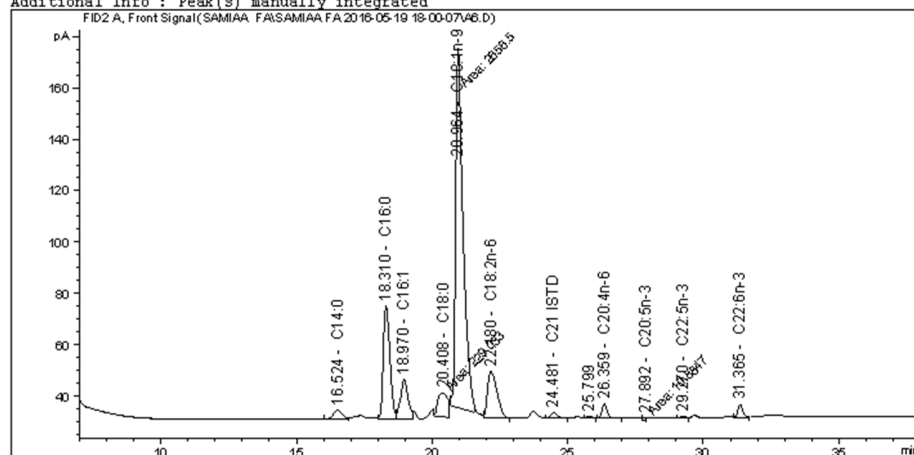

=====  
Area Percent Report  
=====

Sorted By : Signal  
Calib. Data Modified : 6/20/2016 4:41:54 PM  
Multiplier: : 1.0000  
Dilution: : 1.0000  
Sample Amount: : 1.00000 [%] (not used in calc.)  
Use Multiplier & Dilution Factor with ISTDs

Signal 1: FID2 A, Front Signal

| Peak # | RetTime [min] | Type | Width [min] | Area [pA*s] | Area %   | Name     |
|--------|---------------|------|-------------|-------------|----------|----------|
| 1      | 16.524        | VV   | 0.2621      | 76.59245    | 1.64945  | C14:0    |
| 2      | 18.310        | VV   | 0.2005      | 740.70770   | 15.95147 | C16:0    |
| 3      | 18.970        | VV   | 0.2297      | 295.85101   | 6.37128  | C16:1    |
| 4      | 20.408        | MM   | 0.4147      | 229.03307   | 4.93233  | C18:0    |
| 5      | 20.964        | MM   | 0.3169      | 2656.50293  | 57.20897 | C18:1n-9 |
| 6      | 22.180        | VV   | 0.2878      | 444.72211   | 9.57729  | C18:2n-6 |
| 7      | 23.500        |      | 0.0000      | 0.00000     | 0.00000  | C18:3n-3 |
| 8      | 24.481        | BV   | 0.1980      | 35.64333    | 0.76759  | C21:ISTD |
| 9      | 26.359        | VB   | 0.1611      | 74.47244    | 1.60380  | C20:4n-6 |

Instrument 1 7/1/2016 11:13:20 AM Dr Mahdi

Page 1 of 2

Data File C:\CHEM32\1\DATA\SAMIAA FA\SAMIAA FA 2016-05-19 18-00-07\A6.D  
Sample Name: A6

| Peak # | RetTime [min] | Type | Width [min] | Area [pA*s] | Area %  | Name     |
|--------|---------------|------|-------------|-------------|---------|----------|
| 10     | 27.892        | MM   | 0.1578      | 10.88466    | 0.23441 | C20:5n-3 |
| 11     | 29.270        | VV   | 0.1660      | 8.14781     | 0.17547 | C22:5n-3 |
| 12     | 31.365        | VB   | 0.1514      | 61.99995    | 1.33520 | C22:6n-3 |

Totals : 4634.55746 99.8072

7 Warnings or Errors :

Warning : Calibration warnings (see calibration table listing)  
Warning : Calibrated compound(s) not found  
Warning : Invalid calibration curve, (C21 ISTD)  
Warning : Invalid calibration curve, (C20:4n-6)  
Warning : Invalid calibration curve, (C20:5n-3)  
Warning : Invalid calibration curve, (C22:5n-3)  
Warning : Invalid calibration curve, (C22:6n-3)

#### Summed Peaks Report

Signal 1: FID2 A, Front Signal

#### Final Summed Peaks Report

Signal 1: FID2 A, Front Signal

\*\*\* End of Report \*\*\*

## Sample B= HFD+1000 mg/kg

Data File C:\CHEM32\1\DATA\SAMIAA FA\SAMIAA FA 2016-05-19 18-00-07\B1.D  
Sample Name: B1

=====

|                 |                         |            |          |
|-----------------|-------------------------|------------|----------|
| Acq. Operator   | : Dr Mahdi              | Seq. Line  | : 7      |
| Acq. Instrument | : Instrument 1          | Location   | : Vial 7 |
| Injection Date  | : 5/19/2016 10:19:23 PM | Inj        | : 1      |
|                 |                         | Inj Volume | : 1 ul   |

Acq. Method : C:\CHEM32\1\DATA\SAMIAA FA\SAMIAA FA 2016-05-19 18-00-07\NAZIM FA3.M  
Last changed : 5/16/2016 4:23:12 PM by Dr Mahdi  
Analysis Method : C:\CHEM32\1\METHODS\NAZIM FA3.M  
Last changed : 7/1/2016 11:11:06 AM by Dr Mahdi  
(modified after loading)

Additional Info : Peak(s) manually integrated

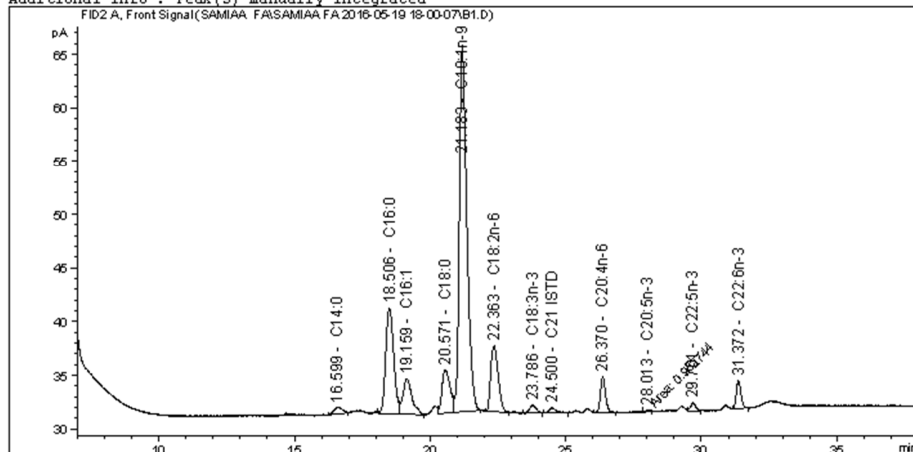

### Area Percent Report

Sorted By : Signal  
Calib. Data Modified : 6/20/2016 4:41:54 PM  
Multiplier: : 1.0000  
Dilution: : 1.0000  
Sample Amount: : 1.00000 [%] (not used in calc.)  
Use Multiplier & Dilution Factor with ISTDs

Signal 1: FID2 A, Front Signal

| Peak # | RetTime [min] | Type | Width [min] | Area [pA*s] | Area %   | Name     |
|--------|---------------|------|-------------|-------------|----------|----------|
| 1      | 16.599        | BB   | 0.2608      | 13.51862    | 1.07793  | C14:0    |
| 2      | 18.506        | VV   | 0.2484      | 201.97397   | 16.10472 | C16:0    |
| 3      | 19.159        | VB   | 0.2722      | 76.47923    | 6.09820  | C16:1    |
| 4      | 20.571        | VV   | 0.2456      | 83.73181    | 6.67649  | C18:0    |
| 5      | 21.183        | VB   | 0.2264      | 653.37372   | 52.09782 | C18:1n-9 |
| 6      | 22.363        | BV   | 0.2236      | 116.87086   | 9.31889  | C18:2n-6 |
| 7      | 23.786        | VV   | 0.2088      | 12.65981    | 1.00945  | C18:3n-3 |
| 8      | 24.500        | VB   | 0.2268      | 9.72008     | 0.77505  | C21:1STD |
| 9      | 26.370        | VB   | 0.1558      | 43.58773    | 3.47554  | C20:4n-6 |

Instrument 1 7/1/2016 11:13:35 AM Dr Mahdi

Page 1 of 2

Data File C:\CHEM32\1\DATA\SAMIAA FA\SAMIAA FA 2016-05-19 18-00-07\B1.D  
Sample Name: B1

| Peak # | RetTime [min] | Type | Width [min] | Area [pA*s] | Area %  | Name     |
|--------|---------------|------|-------------|-------------|---------|----------|
| 10     | 28.013        | MM   | 0.1832      | 9.82744e-1  | 0.07836 | C20:5n-3 |
| 11     | 29.701        | VV   | 0.1628      | 9.41171     | 0.75046 | C22:5n-3 |
| 12     | 31.372        | VB   | 0.1453      | 31.81837    | 2.53709 | C22:6n-3 |

Totals : 1254.12865 100.0000

6 Warnings or Errors :

Warning : Calibration warnings (see calibration table listing)  
Warning : Invalid calibration curve, (C21 ISTD)  
Warning : Invalid calibration curve, (C20:4n-6)  
Warning : Invalid calibration curve, (C20:5n-3)  
Warning : Invalid calibration curve, (C22:5n-3)  
Warning : Invalid calibration curve, (C22:6n-3)

=====

Summed Peaks Report

=====

Signal 1: FID2 A, Front Signal

=====

Final Summed Peaks Report

=====

Signal 1: FID2 A, Front Signal

\*\*\* End of Report \*\*\*

Data File C:\CHEM32\1\DATA\SAMIAA FA\SAMIAA FA 2016-05-19 18-00-07\B2.D  
Sample Name: B2

=====

|                                        |                   |
|----------------------------------------|-------------------|
| Acq. Operator : Dr Mahdi               | Seq. Line : 8     |
| Acq. Instrument : Instrument 1         | Location : Vial 8 |
| Injection Date : 5/19/2016 11:02:04 PM | Inj : 1           |
|                                        | Inj Volume : 1 ul |

Acq. Method : C:\CHEM32\1\DATA\SAMIAA FA\SAMIAA FA 2016-05-19 18-00-07\NAZIM FA3.M  
Last changed : 5/16/2016 4:23:12 PM by Dr Mahdi  
Analysis Method : C:\CHEM32\1\METHODS\NAZIM FA3.M  
Last changed : 7/1/2016 11:11:06 AM by Dr Mahdi  
(modified after loading)

Additional Info : Peak(s) manually integrated

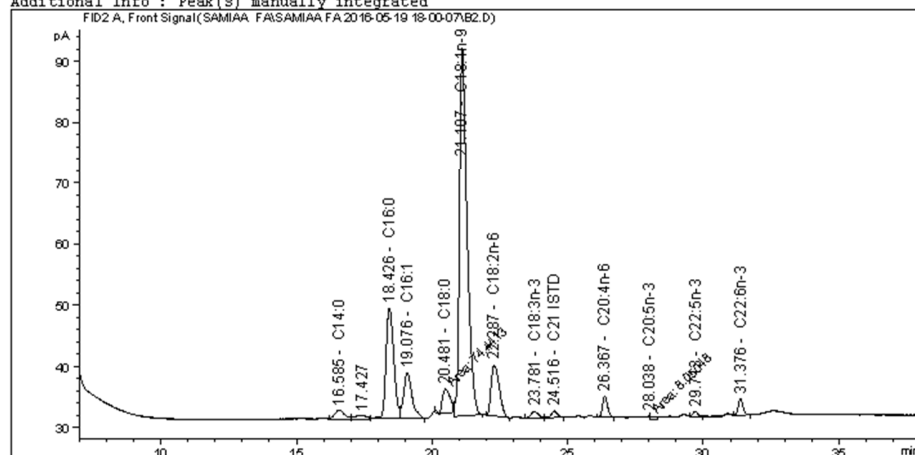

Area Percent Report

Sorted By : Signal  
Calib. Data Modified : 6/20/2016 4:41:54 PM  
Multiplier: : 1.0000  
Dilution: : 1.0000  
Sample Amount: : 1.00000 [%] (not used in calc.)  
Use Multiplier & Dilution Factor with ISTDs

Signal 1: FID2 A, Front Signal

| Peak # | RetTime [min] | Type | Width [min] | Area [pA*s] | Area %   | Name     |
|--------|---------------|------|-------------|-------------|----------|----------|
| 1      | 16.585        | BV   | 0.2863      | 34.77602    | 1.64315  | C14:0    |
| 2      | 18.426        | VV   | 0.2372      | 358.45895   | 16.93701 | C16:0    |
| 3      | 19.076        | VB   | 0.2552      | 163.98143   | 7.74804  | C16:1    |
| 4      | 20.481        | MM   | 0.3231      | 74.44135    | 3.51732  | C18:0    |
| 5      | 21.107        | VB   | 0.2310      | 1161.33093  | 54.87232 | C18:1n-9 |
| 6      | 22.287        | BB   | 0.2460      | 172.84622   | 8.16690  | C18:2n-6 |
| 7      | 23.781        | BV   | 0.2111      | 18.72569    | 0.88478  | C18:3n-3 |
| 8      | 24.516        | VV   | 0.1860      | 16.55481    | 0.78221  | C21:1STD |
| 9      | 26.367        | VB   | 0.1583      | 46.00758    | 2.17384  | C20:4n-6 |

Instrument 1 7/1/2016 11:13:47 AM Dr Mahdi

Page 1 of 2

Data File C:\CHEM32\1\DATA\SAMIAA FA\SAMIAA FA 2016-05-19 18-00-07\B2.D  
Sample Name: B2

| Peak # | RetTime [min] | Type | Width [min] | Area [pA*s] | Area %  | Name     |
|--------|---------------|------|-------------|-------------|---------|----------|
| 10     | 28.038        | MM   | 0.2303      | 8.05048     | 0.38038 | C20:5n-3 |
| 11     | 29.713        | VV   | 0.1619      | 10.89538    | 0.51480 | C22:5n-3 |
| 12     | 31.376        | VB   | 0.1481      | 33.64418    | 1.58967 | C22:6n-3 |

Totals : 2099.71303 99.2104

6 Warnings or Errors :

Warning : Calibration warnings (see calibration table listing)  
Warning : Invalid calibration curve, (C21 ISTD)  
Warning : Invalid calibration curve, (C20:4n-6)  
Warning : Invalid calibration curve, (C20:5n-3)  
Warning : Invalid calibration curve, (C22:5n-3)  
Warning : Invalid calibration curve, (C22:6n-3)

=====

Summed Peaks Report

=====

Signal 1: FID2 A, Front Signal

=====

Final Summed Peaks Report

=====

Signal 1: FID2 A, Front Signal

\*\*\* End of Report \*\*\*

Data File C:\CHEM32\1\DATA\SAMIAA FA\SAMIAA FA 2016-05-19 18-00-07\B3.D  
Sample Name: B3

=====

|                                        |                   |
|----------------------------------------|-------------------|
| Acq. Operator : Dr Mahdi               | Seq. Line : 9     |
| Acq. Instrument : Instrument 1         | Location : Vial 9 |
| Injection Date : 5/19/2016 11:44:53 PM | Inj : 1           |
|                                        | Ini Volume : 1 ul |

Acq. Method : C:\CHEM32\1\DATA\SAMIAA FA\SAMIAA FA 2016-05-19 18-00-07\NAZIM FA3.M  
Last changed : 5/16/2016 4:23:12 PM by Dr Mahdi  
Analysis Method : C:\CHEM32\1\METHODS\NAZIM FA3.M  
Last changed : 7/1/2016 11:11:06 AM by Dr Mahdi  
(modified after loading)

Additional Info : Peak(s) manually integrated

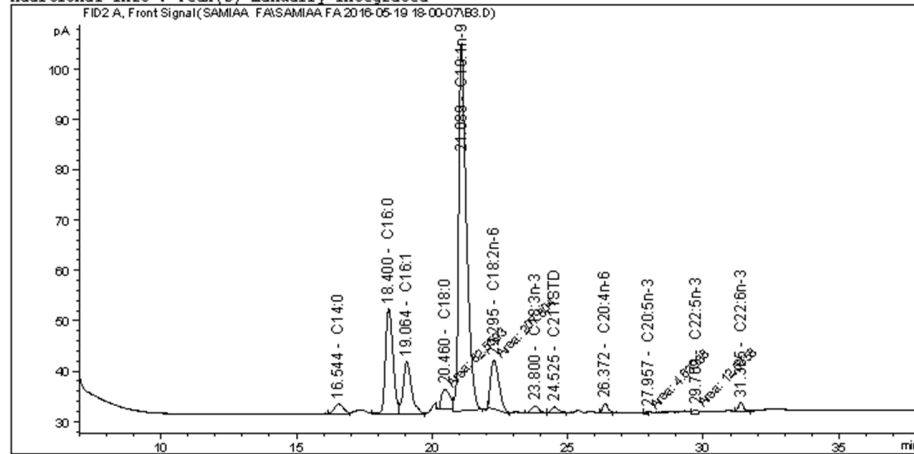

Area Percent Report

Sorted By : Signal  
Calib. Data Modified : 6/20/2016 4:41:54 PM  
Multiplier: : 1.0000  
Dilution: : 1.0000  
Sample Amount: : 1.00000 [%] (not used in calc.)  
Use Multiplier & Dilution Factor with ISTDs

Signal 1: FID2 A, Front Signal

| Peak # | RetTime [min] | Type | Width [min] | Area [pA*s] | Area %   | Name     |
|--------|---------------|------|-------------|-------------|----------|----------|
| 1      | 16.544        | BV   | 0.2705      | 43.30397    | 1.73612  | C14:0    |
| 2      | 18.400        | VV   | 0.2301      | 401.11743   | 16.08137 | C16:0    |
| 3      | 19.064        | VV   | 0.2485      | 213.76836   | 8.57028  | C16:1    |
| 4      | 20.460        | MM   | 0.3530      | 82.55927    | 3.30992  | C18:0    |
| 5      | 21.089        | VB   | 0.2357      | 1441.08679  | 57.77523 | C18:1n-9 |
| 6      | 22.295        | MM   | 0.3588      | 207.80382   | 8.33115  | C18:2n-6 |
| 7      | 23.800        | VV   | 0.2148      | 24.29253    | 0.97392  | C18:3n-3 |
| 8      | 24.525        | VV   | 0.1966      | 18.21588    | 0.73030  | C21:1STD |
| 9      | 26.372        | BV   | 0.1558      | 24.12448    | 0.96718  | C20:4n-6 |

Instrument 1 7/1/2016 11:14:05 AM Dr Mahdi

Page 1 of 2

Data File C:\CHEM32\1\DATA\SAMIAA FA\SAMIAA FA 2016-05-19 18-00-07\B3.D  
Sample Name: B3

| Peak # | RetTime [min] | Type | Width [min] | Area [pA*s] | Area %  | Name     |
|--------|---------------|------|-------------|-------------|---------|----------|
| 10     | 27.957        | MM   | 0.1766      | 4.63938     | 0.18600 | C20:5n-3 |
| 11     | 29.709        | MM   | 0.2305      | 12.07578    | 0.48414 | C22:5n-3 |
| 12     | 31.385        | VB   | 0.1448      | 21.31088    | 0.85438 | C22:6n-3 |

Totals : 2494.29857 100.0000

6 Warnings or Errors :

Warning : Calibration warnings (see calibration table listing)  
Warning : Invalid calibration curve, (C21 ISTD)  
Warning : Invalid calibration curve, (C20:4n-6)  
Warning : Invalid calibration curve, (C20:5n-3)  
Warning : Invalid calibration curve, (C22:5n-3)  
Warning : Invalid calibration curve, (C22:6n-3)

=====

Summed Peaks Report

=====

Signal 1: FID2 A, Front Signal

=====

Final Summed Peaks Report

=====

Signal 1: FID2 A, Front Signal

\*\*\* End of Report \*\*\*



Data File C:\CHEM32\1\DATA\SAMIAA FA\SAMIAA FA 2016-05-19 18-00-07\B5.D  
Sample Name: B5

```
=====
Acq. Operator   : Dr Mahdi                      Seq. Line :   11
Acq. Instrument : Instrument 1                  Location  : Vial 11
Injection Date  : 5/20/2016 1:10:24 AM          Inj       :    1
                                           Inj Volume: 1 µl
Acq. Method     : C:\CHEM32\1\DATA\SAMIAA FA\SAMIAA FA 2016-05-19 18-00-07\NAZIM FA3.M
Last changed    : 5/16/2016 4:23:12 PM by Dr Mahdi
Analysis Method : C:\CHEM32\1\METHODS\NAZIM FA3.M
Last changed    : 7/1/2016 11:11:06 AM by Dr Mahdi
                  (modified after loading)
Additional Info : Peak(s) manually integrated
```

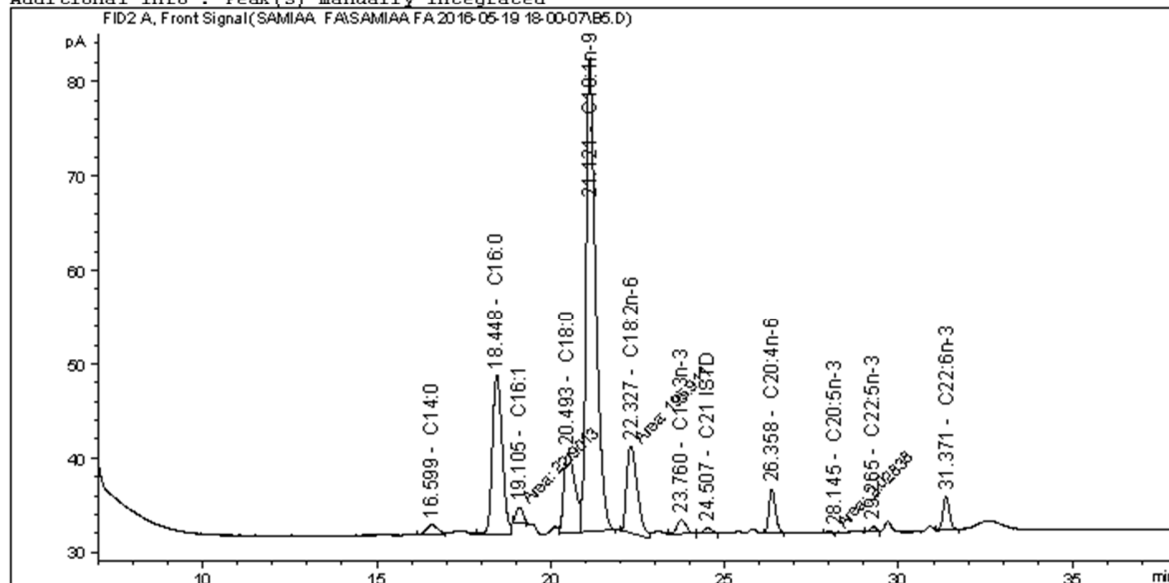

# Area Percent Report

```
Sorted By      : Signal
Calib. Data Modified : 6/20/2016 4:41:54 PM
Multiplier:     : 1.0000
Dilution:       : 1.0000
Sample Amount:  : 1.00000 [%] (not used in calc.)
Use Multiplier & Dilution Factor with ISTDs
```

Signal 1: FID2 A, Front Signal

| Peak # | RetTime [min] | Type | Width [min] | Area [pA*s] | Area %   | Name     |
|--------|---------------|------|-------------|-------------|----------|----------|
| 1      | 16.599        | BV   | 0.2673      | 22.01955    | 1.16966  | C14:0    |
| 2      | 18.448        | BV   | 0.2319      | 331.00018   | 17.58243 | C16:0    |
| 3      | 19.105        | MM   | 0.2297      | 22.90125    | 1.21649  | C16:1    |
| 4      | 20.493        | VV   | 0.2654      | 190.56412   | 10.12259 | C18:0    |
| 5      | 21.121        | VB   | 0.2301      | 970.81183   | 51.56864 | C18:1n-9 |
| 6      | 22.327        | MM   | 0.3567      | 195.91066   | 10.40660 | C18:2n-6 |
| 7      | 23.760        | VV   | 0.2104      | 26.07114    | 1.38488  | C18:3n-3 |
| 8      | 24.507        | VV   | 0.1848      | 8.35252     | 0.44368  | C21:1STD |
| 9      | 26.358        | VV   | 0.1541      | 60.29056    | 3.20258  | C20:4n-6 |

Instrument 1 7/1/2016 11:14:36 AM Dr Mahdi

Page 1 of 2

Data File C:\CHEM32\1\DATA\SAMIAA FA\SAMIAA FA 2016-05-19 18-00-07\B5.D  
Sample Name: B5

| Peak # | RetTime [min] | Type | Width [min] | Area [pA*s] | Area %  | Name     |
|--------|---------------|------|-------------|-------------|---------|----------|
| 10     | 28.145        | MM   | 0.1659      | 2.02838     | 0.10775 | C20:5n-3 |
| 11     | 29.265        | BV   | 0.1582      | 7.09162     | 0.37670 | C22:5n-3 |
| 12     | 31.371        | VB   | 0.1517      | 45.52070    | 2.41802 | C22:6n-3 |

Totals : 1882.56251 100.0000

6 Warnings or Errors :

Warning : Calibration warnings (see calibration table listing)  
Warning : Invalid calibration curve, (C21 ISTD)  
Warning : Invalid calibration curve, (C20:4n-6)  
Warning : Invalid calibration curve, (C20:5n-3)  
Warning : Invalid calibration curve, (C22:5n-3)  
Warning : Invalid calibration curve, (C22:6n-3)

=====

Summed Peaks Report

=====

Signal 1: FID2 A, Front Signal

=====

Final Summed Peaks Report

=====

Signal 1: FID2 A, Front Signal

\*\*\* End of Report \*\*\*

Data File C:\CHEM32\1\DATA\SAMIAA FA\SAMIAA FA 2016-05-19 18-00-07\B6.D  
Sample Name: B6

=====

|                                       |                    |
|---------------------------------------|--------------------|
| Acq. Operator : Dr Mahdi              | Seq. Line : 12     |
| Acq. Instrument : Instrument 1        | Location : Vial 12 |
| Injection Date : 5/20/2016 1:53:07 AM | Inj : 1            |
|                                       | Ini Volume : 1 ul  |

Acq. Method : C:\CHEM32\1\DATA\SAMIAA FA\SAMIAA FA 2016-05-19 18-00-07\NAZIM FA3.M  
Last changed : 5/16/2016 4:23:12 PM by Dr Mahdi  
Analysis Method : C:\CHEM32\1\METHODS\NAZIM FA3.M  
Last changed : 7/1/2016 11:11:06 AM by Dr Mahdi  
(modified after loading)

Additional Info : Peak(s) manually integrated

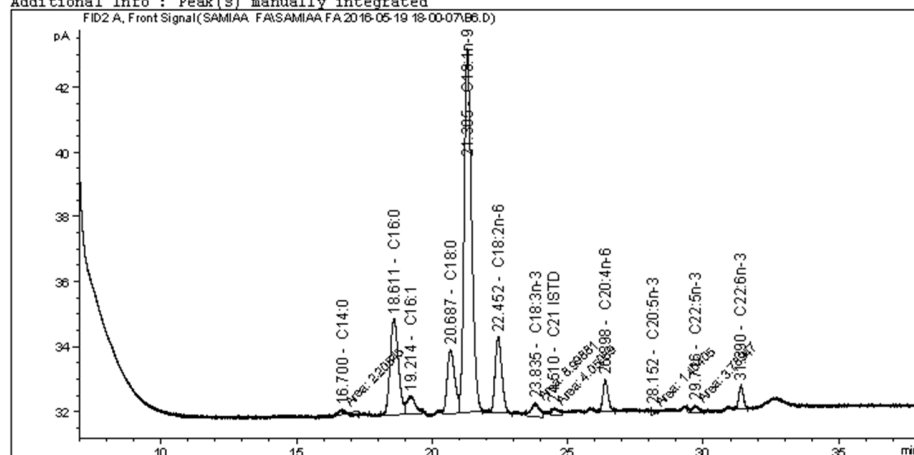

Area Percent Report

Sorted By : Signal  
Calib. Data Modified : 6/20/2016 4:41:54 PM  
Multiplier: : 1.0000  
Dilution: : 1.0000  
Sample Amount: : 1.00000 [%] (not used in calc.)  
Use Multiplier & Dilution Factor with ISTDs

Signal 1: FID2 A, Front Signal

| Peak # | RetTime [min] | Type | Width [min] | Area [pA*s] | Area %   | Name     |
|--------|---------------|------|-------------|-------------|----------|----------|
| 1      | 16.700        | MM   | 0.2401      | 2.20545     | 0.54085  | C14:0    |
| 2      | 18.611        | BV   | 0.2544      | 62.98857    | 15.44685 | C16:0    |
| 3      | 19.214        | VB   | 0.2646      | 12.65439    | 3.10327  | C16:1    |
| 4      | 20.687        | VV   | 0.2286      | 37.93367    | 9.30257  | C18:0    |
| 5      | 21.305        | VB   | 0.2237      | 212.52498   | 52.11804 | C18:1n-9 |
| 6      | 22.452        | BB   | 0.2090      | 40.06107    | 9.82428  | C18:2n-6 |
| 7      | 23.835        | MM   | 0.3617      | 8.99881     | 2.20680  | C18:3n-3 |
| 8      | 24.510        | MM   | 0.2670      | 4.05089     | 0.99341  | C21 ISTD |
| 9      | 26.398        | BB   | 0.1554      | 12.72753    | 3.12120  | C20:4n-6 |

Instrument 1 7/1/2016 11:15:08 AM Dr Mahdi

Page 1 of 2

Data File C:\CHEM32\1\DATA\SAMIAA FA\SAMIAA FA 2016-05-19 18-00-07\B6.D  
Sample Name: B6

| Peak # | RetTime [min] | Type | Width [min] | Area [pA*s] | Area %  | Name     |
|--------|---------------|------|-------------|-------------|---------|----------|
| 10     | 28.152        | MM   | 0.1472      | 1.40405     | 0.34432 | C20:5n-3 |
| 11     | 29.716        | MM   | 0.2715      | 3.78947     | 0.92930 | C22:5n-3 |
| 12     | 31.390        | BV   | 0.1435      | 8.43732     | 2.06911 | C22:6n-3 |

Totals : 407.77621 100.0000

6 Warnings or Errors :

Warning : Calibration warnings (see calibration table listing)  
Warning : Invalid calibration curve, (C21 ISTD)  
Warning : Invalid calibration curve, (C20:4n-6)  
Warning : Invalid calibration curve, (C20:5n-3)  
Warning : Invalid calibration curve, (C22:5n-3)  
Warning : Invalid calibration curve, (C22:6n-3)

=====

Summed Peaks Report

=====

Signal 1: FID2 A, Front Signal

=====

Final Summed Peaks Report

=====

Signal 1: FID2 A, Front Signal

\*\*\* End of Report \*\*\*

## Sample C= HFD+1500 mg/kg

Data File C:\CHEM32\1\DATA\SAMIAA FA\SAMIAA FA 2016-05-19 18-00-07\C1.D  
Sample Name: C1

=====

|                                                                                    |                    |
|------------------------------------------------------------------------------------|--------------------|
| Acq. Operator : Dr Mahdi                                                           | Seq. Line : 13     |
| Acq. Instrument : Instrument 1                                                     | Location : Vial 13 |
| Injection Date : 5/20/2016 2:35:52 AM                                              | Inj : 1            |
|                                                                                    | Inj Volume : 1 µl  |
| Acq. Method : C:\CHEM32\1\DATA\SAMIAA FA\SAMIAA FA 2016-05-19 18-00-07\NAZIM FA3.M |                    |
| Last changed : 5/16/2016 4:23:12 PM by Dr Mahdi                                    |                    |
| Analysis Method : C:\CHEM32\1\METHODS\NAZIM FA3.M                                  |                    |
| Last changed : 7/1/2016 11:11:06 AM by Dr Mahdi                                    |                    |
| (modified after loading)                                                           |                    |

Additional Info : Peak(s) manually integrated

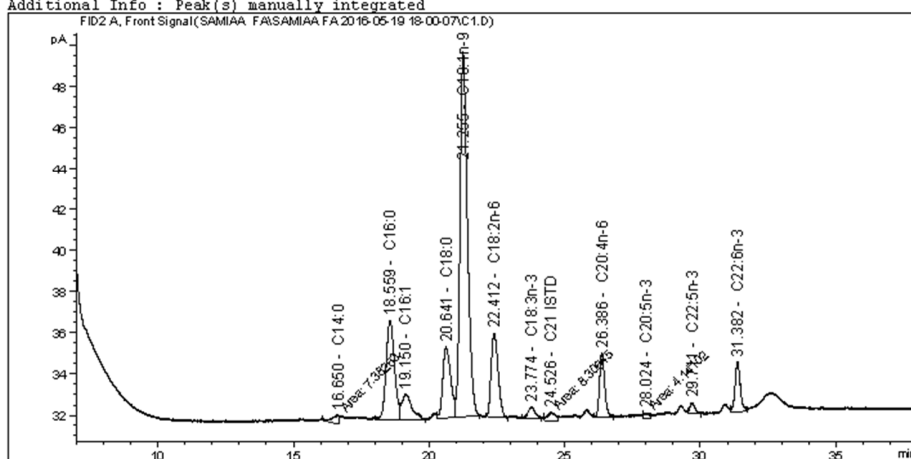

### Area Percent Report

Sorted By : Signal  
Calib. Data Modified : 6/20/2016 4:41:54 PM  
Multiplier: : 1.0000  
Dilution: : 1.0000  
Sample Amount: : 1.00000 [%] (not used in calc.)  
Use Multiplier & Dilution Factor with ISTDs

Signal 1: FID2 A, Front Signal

| Peak # | RetTime [min] | Type | Width [min] | Area [pA*s] | Area %   | Name     |
|--------|---------------|------|-------------|-------------|----------|----------|
| 1      | 16.650        | MM   | 0.2795      | 7.38263     | 1.02167  | C14:0    |
| 2      | 18.559        | VV   | 0.2519      | 103.03841   | 14.25932 | C16:0    |
| 3      | 19.150        | VB   | 0.3091      | 31.68864    | 4.38534  | C16:1    |
| 4      | 20.641        | VV   | 0.2431      | 69.59349    | 9.63093  | C18:0    |
| 5      | 21.255        | VB   | 0.2231      | 335.17380   | 46.38418 | C18:1n-9 |
| 6      | 22.412        | BB   | 0.2114      | 72.53200    | 10.03759 | C18:2n-6 |
| 7      | 23.774        | VV   | 0.2036      | 9.19260     | 1.27215  | C18:3n-3 |
| 8      | 24.526        | MM   | 0.3311      | 8.30645     | 1.14952  | C21:1STD |
| 9      | 26.386        | VB   | 0.1579      | 40.72181    | 5.63543  | C20:4n-6 |

Instrument 1 7/1/2016 11:15:26 AM Dr Mahdi

Page 1 of 2

Data File C:\CHEM32\1\DATA\SAMIAA FA\SAMIAA FA 2016-05-19 18-00-07\Cl.D  
Sample Name: Cl

| Peak # | RetTime [min] | Type | Width [min] | Area [pA*s] | Area %  | Name     |
|--------|---------------|------|-------------|-------------|---------|----------|
| 10     | 28.024        | MM   | 0.2261      | 4.14102     | 0.57307 | C20:5n-3 |
| 11     | 29.711        | VV   | 0.1587      | 7.35145     | 1.01736 | C22:5n-3 |
| 12     | 31.382        | VV   | 0.1624      | 33.48139    | 4.63344 | C22:6n-3 |

Totals : 722.60369 100.0000

# 6 Warnings or Errors :

Warning : Calibration warnings (see calibration table listing)  
Warning : Invalid calibration curve, (C21 ISTD)  
Warning : Invalid calibration curve, (C20:4n-6)  
Warning : Invalid calibration curve, (C20:5n-3)  
Warning : Invalid calibration curve, (C22:5n-3)  
Warning : Invalid calibration curve, (C22:6n-3)

## Summed Peaks Report

Signal 1: FID2 A, Front Signal

## Final Summed Peaks Report

Signal 1: FID2 A, Front Signal  
\*\*\* End of Report \*\*\*

Data File C:\CHEM32\1\DATA\SAMIAA FA\SAMIAA FA 2016-05-19 18-00-07\C2.D  
Sample Name: C2

=====

|                                       |                    |
|---------------------------------------|--------------------|
| Acq. Operator : Dr Mahdi              | Seq. Line : 14     |
| Acq. Instrument : Instrument 1        | Location : Vial 14 |
| Injection Date : 5/20/2016 3:18:33 AM | Inj : 1            |
|                                       | Inj Volume : 1 µl  |

Acq. Method : C:\CHEM32\1\DATA\SAMIAA FA\SAMIAA FA 2016-05-19 18-00-07\NAZIM FA3.M  
Last changed : 5/16/2016 4:23:12 PM by Dr Mahdi  
Analysis Method : C:\CHEM32\1\METHODS\NAZIM FA3.M  
Last changed : 7/1/2016 11:11:06 AM by Dr Mahdi  
(modified after loading)

Additional Info : Peak(s) manually integrated

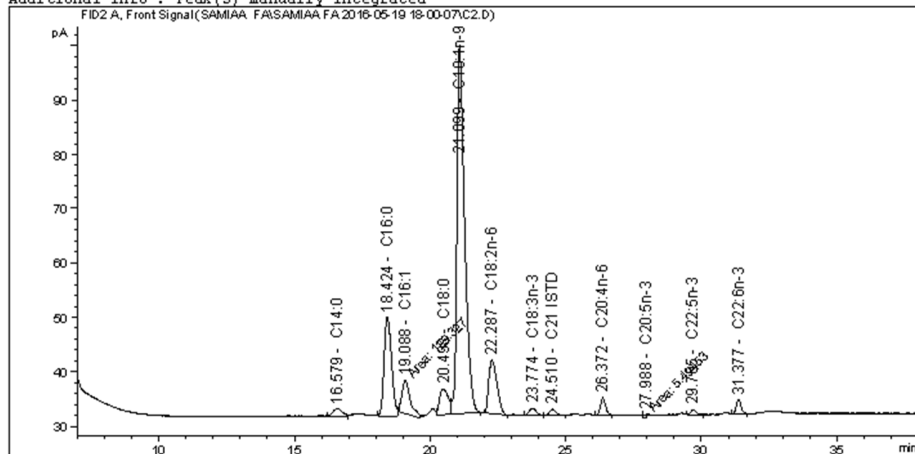

Area Percent Report

Sorted By : Signal  
Calib. Data Modified : 6/20/2016 4:41:54 PM  
Multiplier: : 1.0000  
Dilution: : 1.0000  
Sample Amount: : 1.00000 [%] (not used in calc.)  
Use Multiplier & Dilution Factor with ISTDs

Signal 1: FID2 A, Front Signal

| Peak # | RetTime [min] | Type | Width [min] | Area [pA*s] | Area %   | Name     |
|--------|---------------|------|-------------|-------------|----------|----------|
| 1      | 16.579        | BV   | 0.2770      | 32.29134    | 1.42114  | C14:0    |
| 2      | 18.424        | VV   | 0.2245      | 346.49377   | 15.24917 | C16:0    |
| 3      | 19.088        | MM   | 0.3514      | 129.32690   | 5.69167  | C16:1    |
| 4      | 20.498        | VV   | 0.2673      | 104.71326   | 4.60843  | C18:0    |
| 5      | 21.099        | VB   | 0.2334      | 1322.11963  | 58.18642 | C18:1n-9 |
| 6      | 22.287        | BB   | 0.2516      | 206.35832   | 9.08182  | C18:2n-6 |
| 7      | 23.774        | VV   | 0.2105      | 23.85121    | 1.04969  | C18:3n-3 |
| 8      | 24.510        | VB   | 0.1876      | 16.95040    | 0.74599  | C21:1STD |
| 9      | 26.372        | VB   | 0.1542      | 41.28127    | 1.81679  | C20:4n-6 |

Instrument 1 7/1/2016 11:15:40 AM Dr Mahdi

Page 1 of 2

Data File C:\CHEM32\1\DATA\SAMIAA FA\SAMIAA FA 2016-05-19 18-00-07\C2.D  
Sample Name: C2

| Peak<br># | RetTime<br>[min] | Type | Width<br>[min] | Area<br>[pA*s] | Area<br>% | Name     |
|-----------|------------------|------|----------------|----------------|-----------|----------|
| 10        | 27.988           | MM   | 0.1311         | 5.49453        | 0.24181   | C20:5n-3 |
| 11        | 29.705           | VB   | 0.1577         | 12.21144       | 0.53742   | C22:5n-3 |
| 12        | 31.377           | BV   | 0.1434         | 31.12145       | 1.36965   | C22:6n-3 |

Totals : 2272.21352 100.0000

6 Warnings or Errors :

Warning : Calibration warnings (see calibration table listing)  
Warning : Invalid calibration curve, (C21 ISTD)  
Warning : Invalid calibration curve, (C20:4n-6)  
Warning : Invalid calibration curve, (C20:5n-3)  
Warning : Invalid calibration curve, (C22:5n-3)  
Warning : Invalid calibration curve, (C22:6n-3)

=====

Summed Peaks Report

=====

Signal 1: FID2 A, Front Signal

=====

Final Summed Peaks Report

=====

Signal 1: FID2 A, Front Signal

\*\*\* End of Report \*\*\*



Data File C:\CHEM32\1\DATA\SAMIAA FA\SAMIAA FA 2016-05-19 18-00-07\C3.D  
Sample Name: C3

=====

|                                                                                    |                    |
|------------------------------------------------------------------------------------|--------------------|
| Acq. Operator : Dr Mahdi                                                           | Seq. Line : 15     |
| Acq. Instrument : Instrument 1                                                     | Location : Vial 15 |
| Injection Date : 5/20/2016 4:01:19 AM                                              | Inj : 1            |
|                                                                                    | Inj Volume : 1 µl  |
| Acq. Method : C:\CHEM32\1\DATA\SAMIAA FA\SAMIAA FA 2016-05-19 18-00-07\NAZIM FA3.M |                    |
| Last changed : 5/16/2016 4:23:12 PM by Dr Mahdi                                    |                    |
| Analysis Method : C:\CHEM32\1\METHODS\NAZIM FA3.M                                  |                    |
| Last changed : 7/1/2016 11:11:06 AM by Dr Mahdi                                    |                    |
| (modified after loading)                                                           |                    |

Additional Info : Peak(s) manually integrated

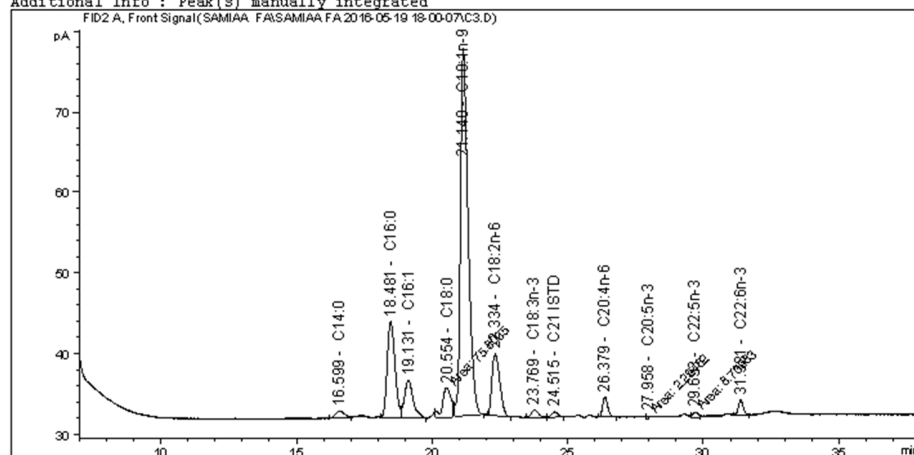

Area Percent Report

Sorted By : Signal  
Calib. Data Modified : 6/20/2016 4:41:54 PM  
Multiplier: : 1.0000  
Dilution: : 1.0000  
Sample Amount: : 1.00000 [%] (not used in calc.)  
Use Multiplier & Dilution Factor with ISTDs

Signal 1: FID2 A, Front Signal

| Peak # | RetTime [min] | Type | Width [min] | Area [pA*s] | Area %   | Name     |
|--------|---------------|------|-------------|-------------|----------|----------|
| 1      | 16.599        | VV   | 0.2754      | 20.46780    | 1.29930  | C14:0    |
| 2      | 18.481        | VV   | 0.2383      | 237.99663   | 15.10807 | C16:0    |
| 3      | 19.131        | VV   | 0.2675      | 106.11951   | 6.73649  | C16:1    |
| 4      | 20.554        | MM   | 0.3481      | 75.80354    | 4.81202  | C18:0    |
| 5      | 21.148        | VB   | 0.2300      | 888.08569   | 56.37584 | C18:1n-9 |
| 6      | 22.334        | BB   | 0.2383      | 151.69058   | 9.62935  | C18:2n-6 |
| 7      | 23.769        | BV   | 0.2077      | 15.57892    | 0.98895  | C18:3n-3 |
| 8      | 24.515        | VV   | 0.1965      | 10.88985    | 0.69129  | C21:1STD |
| 9      | 26.379        | BV   | 0.1606      | 33.49829    | 2.12648  | C20:4n-6 |

Instrument 1 7/1/2016 11:15:54 AM Dr Mahdi

Page 1 of 2

Data File C:\CHEM32\1\DATA\SAMIAA FA\SAMIAA FA 2016-05-19 18-00-07\C3.D  
Sample Name: C3

| Peak # | RetTime [min] | Type | Width [min] | Area [pA*s] | Area %  | Name     |
|--------|---------------|------|-------------|-------------|---------|----------|
| 10     | 27.958        | MM   | 0.0998      | 2.29462     | 0.14566 | C20:5n-3 |
| 11     | 29.693        | MM   | 0.2241      | 8.73983     | 0.55481 | C22:5n-3 |
| 12     | 31.381        | VV   | 0.1513      | 24.12946    | 1.53174 | C22:6n-3 |

Totals : 1575.29474 100.0000

#### 6 Warnings or Errors :

Warning : Calibration warnings (see calibration table listing)  
Warning : Invalid calibration curve, (C21 ISTD)  
Warning : Invalid calibration curve, (C20:4n-6)  
Warning : Invalid calibration curve, (C20:5n-3)  
Warning : Invalid calibration curve, (C22:5n-3)  
Warning : Invalid calibration curve, (C22:6n-3)

#### Summed Peaks Report

Signal 1: FID2 A, Front Signal

#### Final Summed Peaks Report

Signal 1: FID2 A, Front Signal

\*\*\* End of Report \*\*\*

Data File C:\CHEM32\1\DATA\SAMIAA FA\SAMIAA FA 2016-05-19 18-00-07\C4.D  
Sample Name: C4

```
=====
Acq. Operator   : Dr Mahdi                      Seq. Line : 16
Acq. Instrument : Instrument 1                  Location  : Vial 16
Injection Date  : 5/20/2016 4:44:01 AM          Inj       : 1
                                                Inj Volume: 1 µl
Acq. Method     : C:\CHEM32\1\DATA\SAMIAA FA\SAMIAA FA 2016-05-19 18-00-07\NAZIM FA3.M
Last changed    : 5/16/2016 4:23:12 PM by Dr Mahdi
Analysis Method : C:\CHEM32\1\METHODS\NAZIM FA3.M
Last changed    : 7/1/2016 11:11:06 AM by Dr Mahdi
                (modified after loading)
Additional Info : Peak(s) manually integrated
```

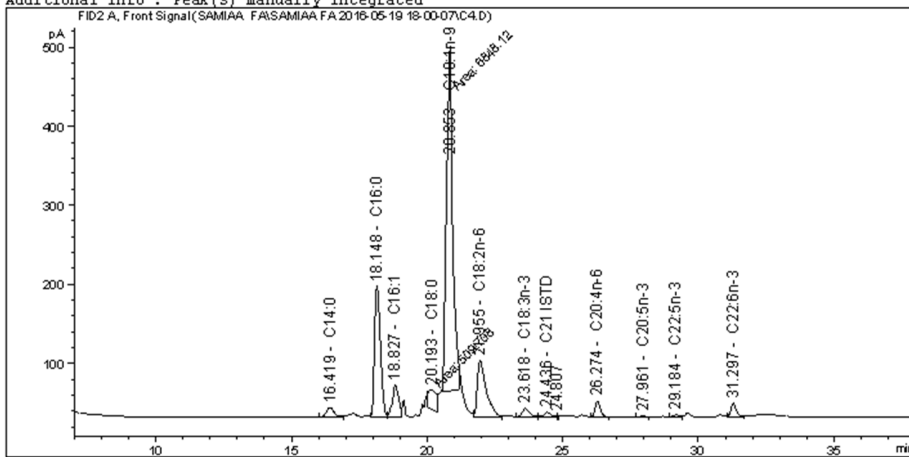

#### Area Percent Report

```
=====
Sorted By      : Signal
Calib. Data Modified : 6/20/2016 4:41:54 PM
Multiplier:    : 1.0000
Dilution:      : 1.0000
Sample Amount: : 1.00000 [%] (not used in calc.)
Use Multiplier & Dilution Factor with ISTDs
```

Signal 1: FID2 A, Front Signal

| Peak # | RetTime [min] | Type | Width [min] | Area [pA*s] | Area %   | Name     |
|--------|---------------|------|-------------|-------------|----------|----------|
| 1      | 16.419        | VV   | 0.2417      | 251.01326   | 1.89759  | C14:0    |
| 2      | 18.148        | VV   | 0.1805      | 2517.40552  | 19.03084 | C16:0    |
| 3      | 18.827        | VV   | 0.1954      | 650.49536   | 4.91755  | C16:1    |
| 4      | 20.193        | MM   | 0.3448      | 509.70850   | 3.85324  | C18:0    |
| 5      | 20.853        | MM   | 0.2624      | 6848.12061  | 51.76975 | C18:1n-9 |
| 6      | 21.955        | VV   | 0.2706      | 1619.00916  | 12.23923 | C18:2n-6 |
| 7      | 23.618        | VV   | 0.2229      | 198.80815   | 1.50293  | C18:3n-3 |
| 8      | 24.436        | VV   | 0.2069      | 97.58797    | 0.73774  | C21:1STD |
| 9      | 26.274        | VB   | 0.1604      | 261.80106   | 1.97914  | C20:4n-6 |

Instrument 1 7/1/2016 11:16:27 AM Dr Mahdi

Page 1 of 2

Data File C:\CHEM32\1\DATA\SAMIAA FA\SAMIAA FA 2016-05-19 18-00-07\C4.D  
Sample Name: C4

| Peak #   | RetTime [min] | Type | Width [min] | Area [pA*s] | Area %  | Name     |
|----------|---------------|------|-------------|-------------|---------|----------|
| 10       | 27.961        | BV   | 0.1465      | 7.67503     | 0.05802 | C20:5n-3 |
| 11       | 29.184        | VV   | 0.1660      | 31.59854    | 0.23888 | C22:5n-3 |
| 12       | 31.297        | VB   | 0.1661      | 231.70003   | 1.75158 | C22:6n-3 |
| Totals : |               |      |             | 1.32249e4   | 99.9765 |          |

6 Warnings or Errors :

Warning : Calibration warnings (see calibration table listing)  
Warning : Invalid calibration curve, (C21 ISTD)  
Warning : Invalid calibration curve, (C20:4n-6)  
Warning : Invalid calibration curve, (C20:5n-3)  
Warning : Invalid calibration curve, (C22:5n-3)  
Warning : Invalid calibration curve, (C22:6n-3)

=====

Summed Peaks Report

=====

Signal 1: FID2 A, Front Signal

=====

Final Summed Peaks Report

=====

Signal 1: FID2 A, Front Signal  
\*\*\* End of Report \*\*\*

Data File C:\CHEM32\1\DATA\SAMIAA FA\SAMIAA FA 2016-05-19 18-00-07\C5.D  
Sample Name: C5

```
=====
Acq. Operator   : Dr Mahdi                      Seq. Line :   17
Acq. Instrument : Instrument 1                  Location  : Vial 17
Injection Date  : 5/20/2016 5:26:47 AM          Inj       :    1
                                           Inj Volume: 1 ul
Acq. Method     : C:\CHEM32\1\DATA\SAMIAA FA\SAMIAA FA 2016-05-19 18-00-07\NAZIM FA3.M
Last changed    : 5/16/2016 4:23:12 PM by Dr Mahdi
Analysis Method : C:\CHEM32\1\METHODS\NAZIM FA3.M
Last changed    : 7/1/2016 11:11:06 AM by Dr Mahdi
                  (modified after loading)
Additional Info : Peak(s) manually integrated
```

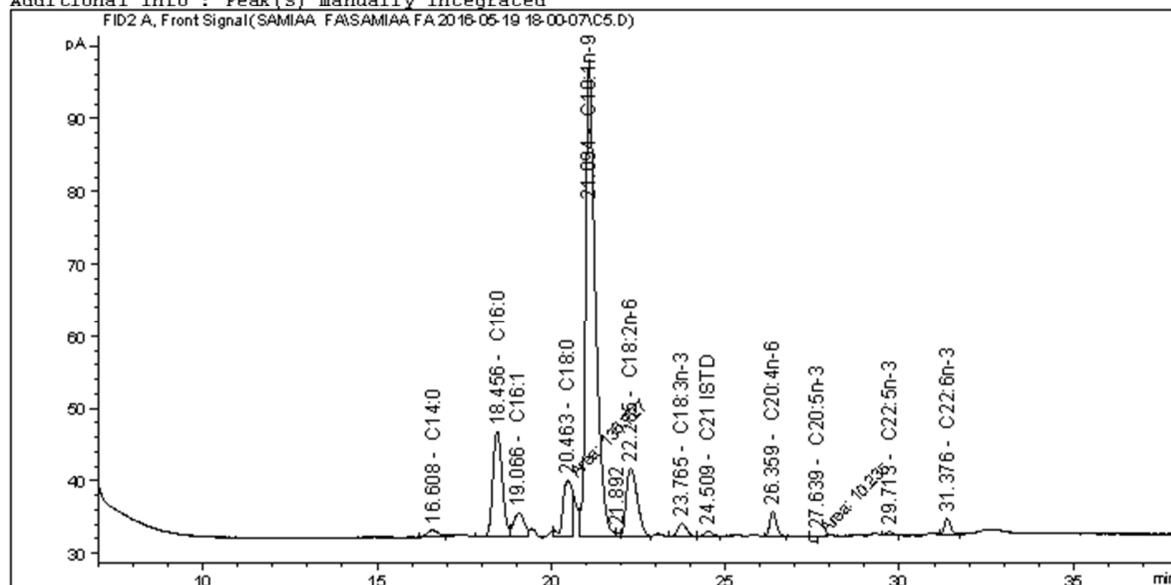

# Area Percent Report

```
Sorted By      : Signal
Calib. Data Modified : 6/20/2016 4:41:54 PM
Multiplier:     : 1.0000
Dilution:       : 1.0000
Sample Amount:  : 1.00000 [%] (not used in calc.)
Use Multiplier & Dilution Factor with ISTDs
```

Signal 1: FID2 A, Front Signal

| Peak # | RetTime [min] | Type | Width [min] | Area [pA*s] | Area %   | Name     |
|--------|---------------|------|-------------|-------------|----------|----------|
| 1      | 16.608        | BV   | 0.2670      | 19.43147    | 0.91054  | C14:0    |
| 2      | 18.456        | VV   | 0.2224      | 272.85870   | 12.78587 | C16:0    |
| 3      | 19.066        | VV   | 0.2577      | 73.45361    | 3.44196  | C16:1    |
| 4      | 20.463        | MM   | 0.2990      | 136.72675   | 6.40687  | C18:0    |
| 5      | 21.094        | VB   | 0.2304      | 1280.63293  | 60.00912 | C18:1n-9 |
| 6      | 22.285        | VV   | 0.2630      | 209.18715   | 9.80229  | C18:2n-6 |
| 7      | 23.765        | BV   | 0.2229      | 33.12486    | 1.55220  | C18:3n-3 |
| 8      | 24.509        | VV   | 0.2062      | 12.68435    | 0.59438  | C21 ISTD |
| 9      | 26.359        | VV   | 0.1618      | 45.90746    | 2.15118  | C20:4n-6 |

Instrument 1 7/1/2016 11:16:41 AM Dr Mahdi

Page 1 of 2

Data File C:\CHEM32\1\DATA\SAMIAA FA\SAMIAA FA 2016-05-19 18-00-07\C5.D  
Sample Name: C5

| Peak<br># | RetTime<br>[min] | Type | Width<br>[min] | Area<br>[pA*s] | Area<br>% | Name     |
|-----------|------------------|------|----------------|----------------|-----------|----------|
| 10        | 27.639           | MM   | 0.1900         | 10.23500       | 0.47960   | C20:5n-3 |
| 11        | 29.713           | VV   | 0.1589         | 7.67566        | 0.35967   | C22:5n-3 |
| 12        | 31.376           | VB   | 0.1491         | 27.49090       | 1.28819   | C22:6n-3 |

Totals : 2129.40885 99.7819

6 Warnings or Errors :

Warning : Calibration warnings (see calibration table listing)  
Warning : Invalid calibration curve, (C21 ISTD)  
Warning : Invalid calibration curve, (C20:4n-6)  
Warning : Invalid calibration curve, (C20:5n-3)  
Warning : Invalid calibration curve, (C22:5n-3)  
Warning : Invalid calibration curve, (C22:6n-3)

=====

Summed Peaks Report

=====

Signal 1: FID2 A, Front Signal

=====

Final Summed Peaks Report

=====

Signal 1: FID2 A, Front Signal

\*\*\* End of Report \*\*\*

Data File C:\CHEM32\1\DATA\SAMIAA FA\SAMIAA FA 2016-05-19 18-00-07\C6.D  
Sample Name: C6

```
=====
Acq. Operator   : Dr Mahdi                      Seq. Line :   18
Acq. Instrument : Instrument 1                  Location  : Vial 18
Injection Date  : 5/20/2016 6:09:42 AM          Inj       :    1
                                           Inj Volume: 1 ul
Acq. Method     : C:\CHEM32\1\DATA\SAMIAA FA\SAMIAA FA 2016-05-19 18-00-07\NAZIM FA3.M
Last changed    : 5/16/2016 4:23:12 PM by Dr Mahdi
Analysis Method : C:\CHEM32\1\METHODS\NAZIM FA3.M
Last changed    : 7/1/2016 11:11:06 AM by Dr Mahdi
                  (modified after loading)
Additional Info : Peak(s) manually integrated
=====
```

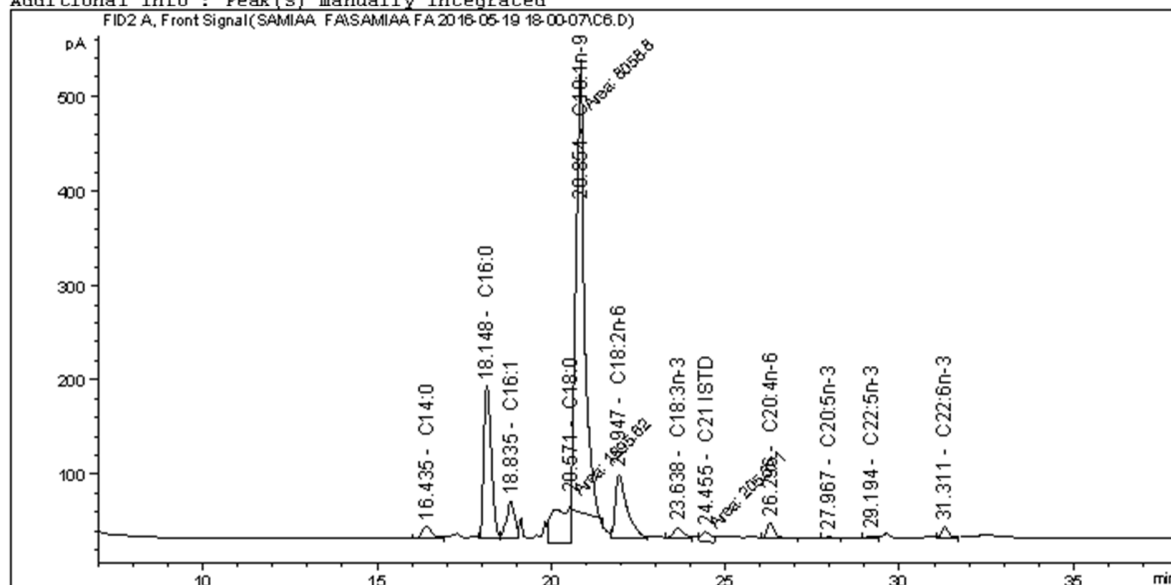

# Area Percent Report

```
=====
Sorted By      : Signal
Calib. Data Modified : 6/20/2016 4:41:54 PM
Multiplier:    : 1.0000
Dilution:      : 1.0000
Sample Amount: : 1.00000 [%] (not used in calc.)
Use Multiplier & Dilution Factor with ISTDs
=====
```

Signal 1: FID2 A, Front Signal

| Peak # | RetTime [min] | Type | Width [min] | Area [pA*s] | Area %   | Name     |
|--------|---------------|------|-------------|-------------|----------|----------|
| 1      | 16.435        | VV   | 0.2357      | 251.00543   | 1.66794  | C14:0    |
| 2      | 18.148        | VV   | 0.1819      | 2428.91797  | 16.14026 | C16:0    |
| 3      | 18.835        | VV   | 0.1968      | 643.36554   | 4.27519  | C16:1    |
| 4      | 20.571        | MM   | 0.4695      | 1295.61865  | 8.60944  | C18:0    |
| 5      | 20.854        | MM   | 0.2806      | 8058.79736  | 53.55105 | C18:1n-9 |
| 6      | 21.947        | VV   | 0.2756      | 1553.12256  | 10.32057 | C18:2n-6 |
| 7      | 23.638        | VV   | 0.2351      | 213.72981   | 1.42024  | C18:3n-3 |
| 8      | 24.455        | MM   | 0.3472      | 205.37114   | 1.36470  | C21:1STD |
| 9      | 26.296        | VB   | 0.1709      | 218.85522   | 1.45430  | C20:4n-6 |

Instrument 1 7/1/2016 11:17:11 AM Dr Mahdi

Page 1 of 2

Data File C:\CHEM32\1\DATA\SAMIAA FA\SAMIAA FA 2016-05-19 18-00-07\C6.D  
Sample Name: C6

| Peak # | RetTime [min] | Type | Width [min] | Area [pA*s] | Area %  | Name     |
|--------|---------------|------|-------------|-------------|---------|----------|
| 10     | 27.967        | BB   | 0.1527      | 9.50140     | 0.06314 | C20:5n-3 |
| 11     | 29.194        | VV   | 0.1704      | 29.61548    | 0.19680 | C22:5n-3 |
| 12     | 31.311        | VB   | 0.1590      | 140.91237   | 0.93637 | C22:6n-3 |

Totals : 1.50488e4 100.0000

# 6 Warnings or Errors :

Warning : Calibration warnings (see calibration table listing)

Warning : Invalid calibration curve, (C21 ISTD)

Warning : Invalid calibration curve, (C20:4n-6)

Warning : Invalid calibration curve, (C20:5n-3)

Warning : Invalid calibration curve, (C22:5n-3)

Warning : Invalid calibration curve, (C22:6n-3)

## Summed Peaks Report

Signal 1: FID2 A, Front Signal

## Final Summed Peaks Report

Signal 1: FID2 A, Front Signal

\*\*\* End of Report \*\*\*



# Sample D= HFD+orlistat

Data File C:\CHEM32\1\DATA\SAMIAA FA\SAMIAA FA 2016-05-19 18-00-07\D1.D  
Sample Name: D1

```
=====
Acq. Operator   : Dr Mahdi                      Seq. Line :   19
Acq. Instrument : Instrument 1                  Location  : Vial 19
Injection Date  : 5/20/2016 6:52:29 AM          Inj       :    1
                                                Inj Volume: 1 ul
Acq. Method     : C:\CHEM32\1\DATA\SAMIAA FA\SAMIAA FA 2016-05-19 18-00-07\NAZIM FA3.M
Last changed    : 5/16/2016 4:23:12 PM by Dr Mahdi
Analysis Method : C:\CHEM32\1\METHODS\NAZIM FA3.M
Last changed    : 7/1/2016 11:11:06 AM by Dr Mahdi
                  (modified after loading)
Additional Info : Peak(s) manually integrated
=====
```

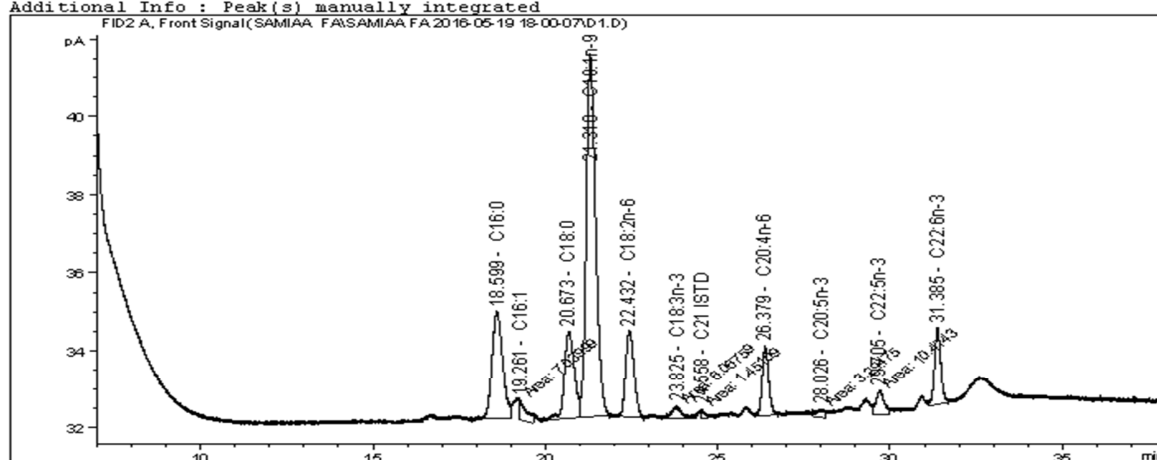

## Area Percent Report

```
Sorted By      : Signal
Calib. Data Modified : 6/20/2016 4:41:54 PM
Multiplier:    : 1.0000
Dilution:      : 1.0000
Sample Amount: : 1.00000 [%] (not used in calc.)
Use Multiplier & Dilution Factor with ISTDs
```

Signal 1: FID2 A, Front Signal

| Peak # | RetTime [min] | Type | Width [min] | Area [pA*s] | Area %   | Name     |
|--------|---------------|------|-------------|-------------|----------|----------|
| 1      | 16.650        |      | 0.0000      | 0.00000     | 0.00000  | C14:0    |
| 2      | 18.599        | BV   | 0.2537      | 59.43208    | 15.04286 | C16:0    |
| 3      | 19.261        | MM   | 0.2286      | 7.03999     | 1.78189  | C16:1    |
| 4      | 20.673        | BV   | 0.2364      | 45.01530    | 11.39382 | C18:0    |
| 5      | 21.310        | VB   | 0.2233      | 175.99504   | 44.54611 | C18:1n-9 |
| 6      | 22.432        | BV   | 0.2021      | 37.81973    | 9.57255  | C18:2n-6 |
| 7      | 23.825        | MM   | 0.3259      | 6.06759     | 1.53577  | C18:3n-3 |
| 8      | 24.558        | MM   | 0.1024      | 1.45109     | 0.36729  | C21:1STD |
| 9      | 26.379        | VV   | 0.1562      | 23.46805    | 5.94000  | C20:4n-6 |

Instrument 1 7/1/2016 11:17:30 AM Dr Mahdi

Page 1 of 2

Data File C:\CHEM32\1\DATA\SAMIAA FA\SAMIAA FA 2016-05-19 18-00-07\DI.D  
Sample Name: DI

| Peak # | RetTime [min] | Type | Width [min] | Area [pA*s] | Area %  | Name     |
|--------|---------------|------|-------------|-------------|---------|----------|
| 10     | 28.026        | MM   | 0.2468      | 3.29475     | 0.83393 | C20:5n-3 |
| 11     | 29.705        | MM   | 0.2750      | 10.47429    | 2.65115 | C22:5n-3 |
| 12     | 31.385        | VV   | 0.1529      | 25.02715    | 6.33462 | C22:6n-3 |

Totals : 395.08507 100.0000

#### 7 Warnings or Errors :

Warning : Calibration warnings (see calibration table listing)  
Warning : Calibrated compound(s) not found  
Warning : Invalid calibration curve, (C21:ISTD)  
Warning : Invalid calibration curve, (C20:4n-6)  
Warning : Invalid calibration curve, (C20:5n-3)  
Warning : Invalid calibration curve, (C22:5n-3)  
Warning : Invalid calibration curve, (C22:6n-3)

#### Summed Peaks Report

Signal 1: FID2 A, Front Signal

#### Final Summed Peaks Report

Signal 1: FID2 A, Front Signal

\*\*\* End of Report \*\*\*

Data File C:\CHEM32\1\DATA\SAMIAA FA\SAMIAA FA 2016-05-19 18-00-07\D2.D  
Sample Name: D2

=====

|                                       |                    |
|---------------------------------------|--------------------|
| Acq. Operator : Dr Mahdi              | Seq. Line : 20     |
| Acq. Instrument : Instrument 1        | Location : Vial 20 |
| Injection Date : 5/20/2016 7:35:09 AM | Inj : 1            |
|                                       | Inj Volume : 1 ul  |

Acq. Method : C:\CHEM32\1\DATA\SAMIAA FA\SAMIAA FA 2016-05-19 18-00-07\NAZIM FA3.M  
Last changed : 5/16/2016 4:23:12 PM by Dr Mahdi  
Analysis Method : C:\CHEM32\1\METHODS\NAZIM FA3.M  
Last changed : 7/1/2016 11:11:06 AM by Dr Mahdi  
(modified after loading)

Additional Info : Peak(s) manually integrated

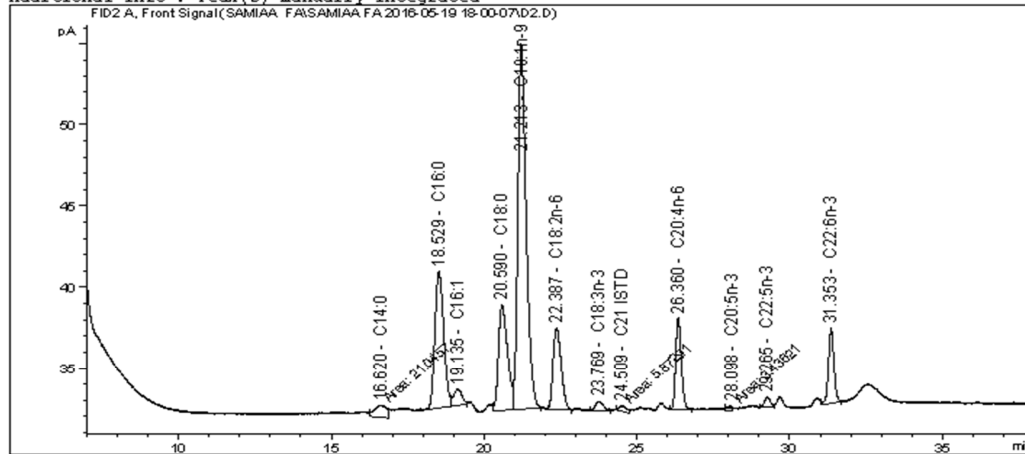

Area Percent Report

Sorted By : Signal  
Calib. Data Modified : 6/20/2016 4:41:54 PM  
Multiplier: : 1.0000  
Dilution: : 1.0000  
Sample Amount: : 1.00000 [%] (not used in calc.)  
Use Multiplier & Dilution Factor with ISTDs

Signal 1: FID2 A, Front Signal

| Peak # | RetTime [min] | Type | Width [min] | Area [pA*s] | Area %   | Name     |
|--------|---------------|------|-------------|-------------|----------|----------|
| 1      | 16.620        | MM   | 0.4568      | 21.04575    | 2.05778  | C14:0    |
| 2      | 18.529        | VV   | 0.2392      | 171.39038   | 16.75799 | C16:0    |
| 3      | 19.135        | VV   | 0.2251      | 19.33800    | 1.89081  | C16:1    |
| 4      | 20.590        | VV   | 0.2401      | 133.29091   | 13.03275 | C18:0    |
| 5      | 21.213        | VE   | 0.2227      | 425.27106   | 41.58162 | C18:1n-9 |
| 6      | 22.387        | BV   | 0.2161      | 92.81897    | 9.07554  | C18:2n-6 |
| 7      | 23.769        | BV   | 0.2037      | 9.60251     | 0.93890  | C18:3n-3 |
| 8      | 24.509        | MM   | 0.2727      | 5.87291     | 0.57423  | C21:1STD |
| 9      | 26.360        | VE   | 0.1580      | 73.90343    | 7.22604  | C20:4n-6 |

Instrument 1 7/1/2016 11:17:45 AM Dr Mahdi

Page 1 of 2

Data File C:\CHEM32\1\DATA\SAMIAA FA\SAMIAA FA 2016-05-19 18-00-07\D2.D  
Sample Name: D2

| Peak<br># | RetTime<br>[min] | Type | Width<br>[min] | Area<br>[pA*s] | Area<br>% | Name     |
|-----------|------------------|------|----------------|----------------|-----------|----------|
| 10        | 28.098           | MM   | 0.1586         | 3.43621        | 0.33598   | C20:5n-3 |
| 11        | 29.265           | BV   | 0.1661         | 8.44703        | 0.82592   | C22:5n-3 |
| 12        | 31.353           | VV   | 0.1503         | 58.32095       | 5.70243   | C22:6n-3 |

Totals : 1022.73809 100.0000

# 6 Warnings or Errors :

Warning : Calibration warnings (see calibration table listing)  
Warning : Invalid calibration curve, (C21 ISTD)  
Warning : Invalid calibration curve, (C20:4n-6)  
Warning : Invalid calibration curve, (C20:5n-3)  
Warning : Invalid calibration curve, (C22:5n-3)  
Warning : Invalid calibration curve, (C22:6n-3)

## Summed Peaks Report

Signal 1: FID2 A, Front Signal

## Final Summed Peaks Report

Signal 1: FID2 A, Front Signal

\*\*\* End of Report \*\*\*

Data File C:\CHEM32\1\DATA\SAMIAA FA\SAMIAA FA 2016-05-19 18-00-07\D2.D  
Sample Name: D2

=====

|                                       |                    |
|---------------------------------------|--------------------|
| Acq. Operator : Dr Mahdi              | Seq. Line : 20     |
| Acq. Instrument : Instrument 1        | Location : Vial 20 |
| Injection Date : 5/20/2016 7:35:09 AM | Inj : 1            |
|                                       | Inj Volume : 1 ul  |

Acq. Method : C:\CHEM32\1\DATA\SAMIAA FA\SAMIAA FA 2016-05-19 18-00-07\NAZIM FA3.M  
Last changed : 5/16/2016 4:23:12 PM by Dr Mahdi  
Analysis Method : C:\CHEM32\1\METHODS\NAZIM FA3.M  
Last changed : 7/1/2016 11:11:06 AM by Dr Mahdi  
(modified after loading)

Additional Info : Peak(s) manually integrated

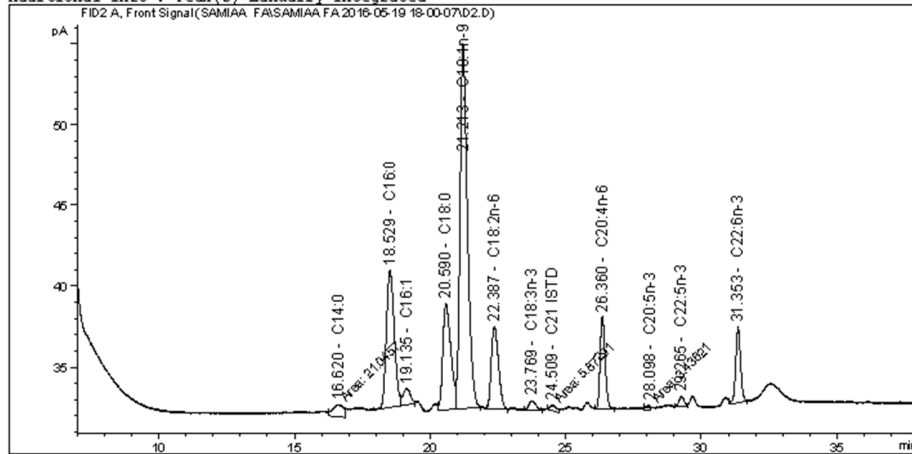

Area Percent Report

Sorted By : Signal  
Calib. Data Modified : 6/20/2016 4:41:54 PM  
Multiplier: : 1.0000  
Dilution: : 1.0000  
Sample Amount: : 1.00000 [%] (not used in calc.)  
Use Multiplier & Dilution Factor with ISTDs

Signal 1: FID2 A, Front Signal

| Peak # | RetTime [min] | Type | Width [min] | Area [pA*s] | Area %   | Name     |
|--------|---------------|------|-------------|-------------|----------|----------|
| 1      | 16.620        | MM   | 0.4568      | 21.04575    | 2.05778  | C14:0    |
| 2      | 18.529        | VV   | 0.2392      | 171.39038   | 16.75799 | C16:0    |
| 3      | 19.135        | VV   | 0.2251      | 19.33800    | 1.89081  | C16:1    |
| 4      | 20.590        | VV   | 0.2401      | 133.29091   | 13.03275 | C18:0    |
| 5      | 21.213        | VB   | 0.2227      | 425.27106   | 41.58162 | C18:1n-9 |
| 6      | 22.387        | BV   | 0.2161      | 92.81897    | 9.07554  | C18:2n-6 |
| 7      | 23.769        | BV   | 0.2037      | 9.60251     | 0.93890  | C18:3n-3 |
| 8      | 24.509        | MM   | 0.2727      | 5.87291     | 0.57423  | C21:1STD |
| 9      | 26.360        | VB   | 0.1580      | 73.90343    | 7.22604  | C20:4n-6 |

Instrument 1 7/1/2016 11:17:45 AM Dr Mahdi

Page 1 of 2

Data File C:\CHEM32\1\DATA\SAMIAA FA\SAMIAA FA 2016-05-19 18-00-07\D2.D  
Sample Name: D2

| Peak # | RetTime [min] | Type | Width [min] | Area [pA*s] | Area %  | Name     |
|--------|---------------|------|-------------|-------------|---------|----------|
| 10     | 28.098        | MM   | 0.1586      | 3.43621     | 0.33598 | C20:5n-3 |
| 11     | 29.265        | BV   | 0.1661      | 8.44703     | 0.82592 | C22:5n-3 |
| 12     | 31.353        | VV   | 0.1503      | 58.32095    | 5.70243 | C22:6n-3 |

Totals : 1022.73809 100.0000

6 Warnings or Errors :

Warning : Calibration warnings (see calibration table listing)  
Warning : Invalid calibration curve, (C21:1STD)  
Warning : Invalid calibration curve, (C20:4n-6)  
Warning : Invalid calibration curve, (C20:5n-3)  
Warning : Invalid calibration curve, (C22:5n-3)  
Warning : Invalid calibration curve, (C22:6n-3)

=====

Summed Peaks Report

=====

Signal 1: FID2 A, Front Signal

=====

Final Summed Peaks Report

=====

Signal 1: FID2 A, Front Signal

\*\*\* End of Report \*\*\*

Data File C:\CHEM32\1\DATA\SAMIAA FA\SAMIAA FA 2016-05-19 18-00-07\D3.D  
Sample Name: D3

=====

|                                       |                    |
|---------------------------------------|--------------------|
| Acq. Operator : Dr Mahdi              | Seq. Line : 21     |
| Acq. Instrument : Instrument 1        | Location : Vial 21 |
| Injection Date : 5/20/2016 8:17:53 AM | Inj : 1            |
|                                       | Inj Volume : 1 µl  |

Acq. Method : C:\CHEM32\1\DATA\SAMIAA FA\SAMIAA FA 2016-05-19 18-00-07\NAZIM FA3.M  
Last changed : 5/16/2016 4:23:12 PM by Dr Mahdi  
Analysis Method : C:\CHEM32\1\METHODS\NAZIM FA3.M  
Last changed : 7/1/2016 11:11:06 AM by Dr Mahdi  
(modified after loading)

Additional Info : Peak(s) manually integrated

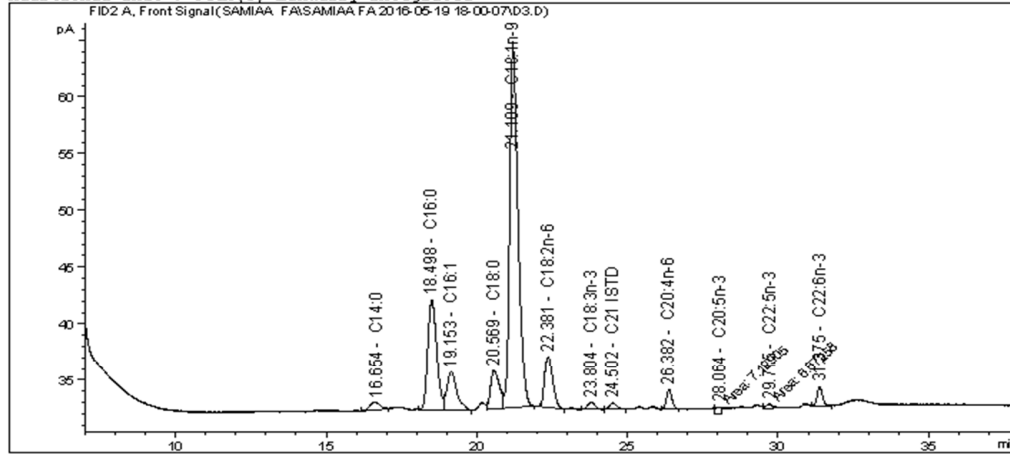

Area Percent Report

Sorted By : Signal  
Calib. Data Modified : 6/20/2016 4:41:54 PM  
Multiplier: : 1.0000  
Dilution: : 1.0000  
Sample Amount: : 1.00000 [%] (not used in calc.)  
Use Multiplier & Dilution Factor with ISTDs

Signal 1: FID2 A, Front Signal

| Peak # | RetTime [min] | Type | Width [min] | Area [pA*s] | Area %   | Name     |
|--------|---------------|------|-------------|-------------|----------|----------|
| 1      | 16.654        | BV   | 0.2797      | 16.23161    | 1.41038  | C14:0    |
| 2      | 18.498        | VV   | 0.2435      | 202.92180   | 17.63201 | C16:0    |
| 3      | 19.153        | VV   | 0.2790      | 80.54428    | 6.99855  | C16:1    |
| 4      | 20.569        | VV   | 0.2396      | 69.88495    | 6.07235  | C18:0    |
| 5      | 21.189        | VB   | 0.2285      | 617.82910   | 53.68359 | C18:1n-9 |
| 6      | 22.381        | BB   | 0.2294      | 85.88630    | 7.46272  | C18:2n-6 |
| 7      | 23.804        | BV   | 0.2015      | 10.45348    | 0.90831  | C18:3n-3 |
| 8      | 24.502        | VB   | 0.1930      | 9.06861     | 0.78798  | C21 ISTD |
| 9      | 26.382        | BV   | 0.1530      | 22.21577    | 1.93034  | C20:4n-6 |

Instrument 1 7/1/2016 11:18:00 AM Dr Mahdi

Page 1 of 2

Data File C:\CHEM32\1\DATA\SAMIAA FA\SAMIAA FA 2016-05-19 18-00-07\D3.D  
Sample Name: D3

| Peak # | RetTime [min] | Type | Width [min] | Area [pA*s] | Area %  | Name     |
|--------|---------------|------|-------------|-------------|---------|----------|
| 10     | 28.064        | MM   | 0.1839      | 7.12905     | 0.61945 | C20:5n-3 |
| 11     | 29.715        | MM   | 0.2250      | 6.67258     | 0.57978 | C22:5n-3 |
| 12     | 31.375        | VB   | 0.1486      | 22.03390    | 1.91454 | C22:6n-3 |

Totals : 1150.87143 100.0000

6 Warnings or Errors :

Warning : Calibration warnings (see calibration table listing)  
Warning : Invalid calibration curve, (C21:1STD)  
Warning : Invalid calibration curve, (C20:4n-6)  
Warning : Invalid calibration curve, (C20:5n-3)  
Warning : Invalid calibration curve, (C22:5n-3)  
Warning : Invalid calibration curve, (C22:6n-3)

=====

Summed Peaks Report

=====

Signal 1: FID2 A, Front Signal

=====

Final Summed Peaks Report

=====

Signal 1: FID2 A, Front Signal

\*\*\* End of Report \*\*\*



Data File C:\CHEM32\1\DATA\SAMIAA FA\SAMIAA FA 2016-05-19 18-00-07\D4.D  
Sample Name: D4

=====

|                                       |                    |
|---------------------------------------|--------------------|
| Acq. Operator : Dr Mahdi              | Seq. Line : 22     |
| Acq. Instrument : Instrument 1        | Location : Vial 22 |
| Injection Date : 5/20/2016 9:00:29 AM | Inj : 1            |
|                                       | Inj Volume : 1 µl  |

Acq. Method : C:\CHEM32\1\DATA\SAMIAA FA\SAMIAA FA 2016-05-19 18-00-07\NAZIM FA3.M  
Last changed : 5/16/2016 4:23:12 PM by Dr Mahdi  
Analysis Method : C:\CHEM32\1\METHODS\NAZIM FA3.M  
Last changed : 7/1/2016 11:11:06 AM by Dr Mahdi  
(modified after loading)

Additional Info : Peak(s) manually integrated

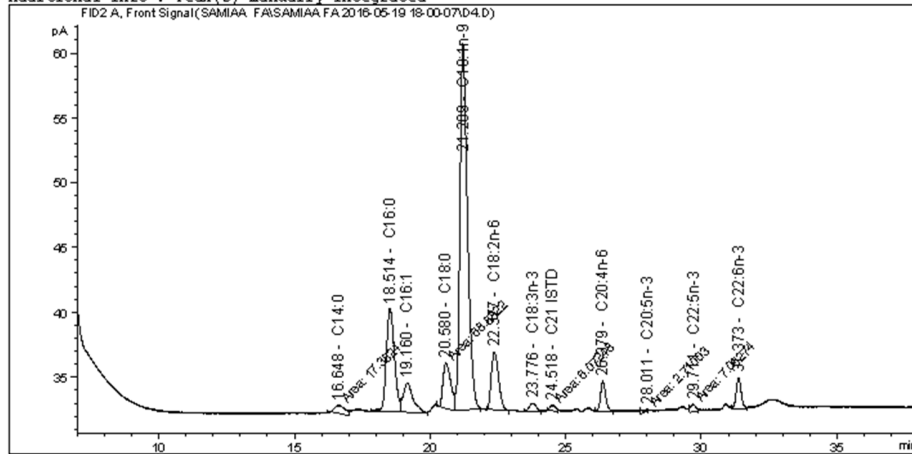

Area Percent Report

Sorted By : Signal  
Calib. Data Modified : 6/20/2016 4:41:54 PM  
Multiplier: : 1.0000  
Dilution: : 1.0000  
Sample Amount: : 1.00000 [%] (not used in calc.)  
Use Multiplier & Dilution Factor with ISTDs

Signal 1: FID2 A, Front Signal

| Peak # | RetTime [min] | Type | Width [min] | Area [pA*s] | Area %   | Name     |
|--------|---------------|------|-------------|-------------|----------|----------|
| 1      | 16.648        | MM   | 0.4612      | 17.38241    | 1.70029  | C14:0    |
| 2      | 18.514        | BV   | 0.2458      | 165.92252   | 16.22996 | C16:0    |
| 3      | 19.160        | VV   | 0.2905      | 55.65021    | 5.44351  | C16:1    |
| 4      | 20.580        | MM   | 0.3294      | 68.88221    | 6.73782  | C18:0    |
| 5      | 21.209        | VV   | 0.2270      | 543.09021   | 53.12319 | C18:1n-9 |
| 6      | 22.377        | BB   | 0.2264      | 82.86333    | 8.10540  | C18:2n-6 |
| 7      | 23.776        | BV   | 0.2083      | 10.99033    | 1.07504  | C18:3n-3 |
| 8      | 24.518        | MM   | 0.2255      | 6.07248     | 0.59399  | C21:1STD |
| 9      | 26.379        | VB   | 0.1576      | 29.59464    | 2.89484  | C20:4n-6 |

Instrument 1 7/1/2016 11:18:19 AM Dr Mahdi

Page 1 of 2

Data File C:\CHEM32\1\DATA\SAMIAA FA\SAMIAA FA 2016-05-19 18-00-07\D4.D  
Sample Name: D4

| Peak # | RetTime [min] | Type | Width [min] | Area [pA*s] | Area %  | Name     |
|--------|---------------|------|-------------|-------------|---------|----------|
| 10     | 28.011        | MM   | 0.3931      | 2.71003     | 0.26509 | C20:5n-3 |
| 11     | 29.711        | MM   | 0.2097      | 7.06274     | 0.69085 | C22:5n-3 |
| 12     | 31.373        | VV   | 0.1589      | 32.10112    | 3.14002 | C22:6n-3 |

Totals : 1022.32224 100.0000

6 Warnings or Errors :

Warning : Calibration warnings (see calibration table listing)  
Warning : Invalid calibration curve, (C21:ISTD)  
Warning : Invalid calibration curve, (C20:4n-6)  
Warning : Invalid calibration curve, (C20:5n-3)  
Warning : Invalid calibration curve, (C22:5n-3)  
Warning : Invalid calibration curve, (C22:6n-3)

=====

Summed Peaks Report

=====

Signal 1: FID2 A, Front Signal

=====

Final Summed Peaks Report

=====

Signal 1: FID2 A, Front Signal

\*\*\* End of Report \*\*\*

Data File C:\CHEM32\1\DATA\SAMIAA FA\SAMIAA FA 2016-05-19 18-00-07\D5.D  
Sample Name: D5

=====

|                                       |                    |
|---------------------------------------|--------------------|
| Acq. Operator : Dr Mahdi              | Seq. Line : 23     |
| Acq. Instrument : Instrument 1        | Location : Vial 23 |
| Injection Date : 5/20/2016 9:43:14 AM | Inj : 1            |
|                                       | Inj Volume : 1 µl  |

Acq. Method : C:\CHEM32\1\DATA\SAMIAA FA\SAMIAA FA 2016-05-19 18-00-07\NAZIM FA3.M  
Last changed : 5/16/2016 4:23:12 PM by Dr Mahdi  
Analysis Method : C:\CHEM32\1\METHODS\NAZIM FA3.M  
Last changed : 7/1/2016 11:11:06 AM by Dr Mahdi  
(modified after loading)

Additional Info : Peak(s) manually integrated

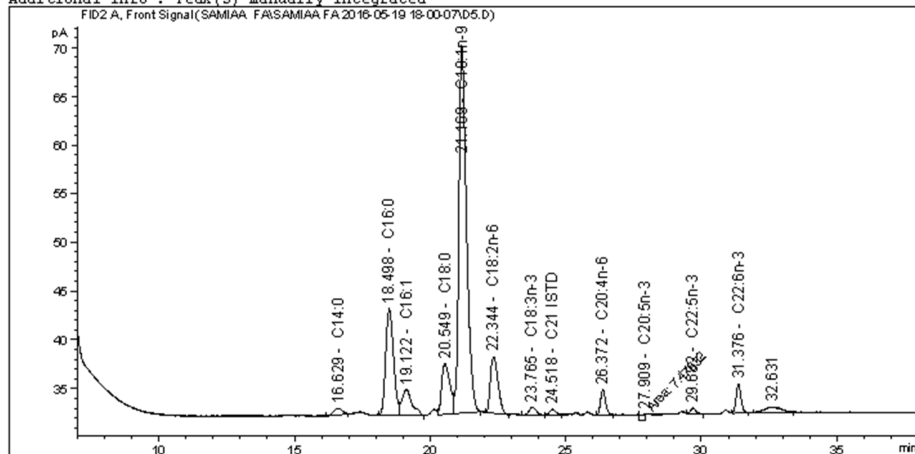

Area Percent Report

Sorted By : Signal  
Calib. Data Modified : 6/20/2016 4:41:54 PM  
Multiplier: : 1.0000  
Dilution: : 1.0000  
Sample Amount: : 1.00000 [%] (not used in calc.)  
Use Multiplier & Dilution Factor with ISTDs

Signal 1: FID2 A, Front Signal

| Peak # | RetTime [min] | Type | Width [min] | Area [pA*s] | Area %   | Name     |
|--------|---------------|------|-------------|-------------|----------|----------|
| 1      | 16.629        | BV   | 0.2741      | 14.93068    | 1.07748  | C14:0    |
| 2      | 18.498        | BV   | 0.2379      | 216.86888   | 15.65047 | C16:0    |
| 3      | 19.122        | VB   | 0.3043      | 68.20333    | 4.92193  | C16:1    |
| 4      | 20.549        | VV   | 0.2521      | 110.43978   | 7.96995  | C18:0    |
| 5      | 21.169        | VV   | 0.2316      | 729.07153   | 52.61386 | C18:1n-9 |
| 6      | 22.344        | BB   | 0.2324      | 113.39867   | 8.18348  | C18:2n-6 |
| 7      | 23.765        | BV   | 0.2183      | 14.53435    | 1.04888  | C18:3n-3 |
| 8      | 24.518        | VV   | 0.1880      | 9.18814     | 0.66307  | C21:1STD |
| 9      | 26.372        | BB   | 0.1550      | 33.21678    | 2.39711  | C20:4n-6 |

Instrument 1 7/1/2016 11:18:30 AM Dr Mahdi

Page 1 of 2

Data File C:\CHEM32\1\DATA\SAMIAA FA\SAMIAA FA 2016-05-19 18-00-07\D5.D  
Sample Name: D5

| Peak #   | RetTime [min] | Type | Width [min] | Area [pA*s] | Area %  | Name     |
|----------|---------------|------|-------------|-------------|---------|----------|
| 10       | 27.909        | MM   | 0.2084      | 7.47632     | 0.53953 | C20:5n-3 |
| 11       | 29.682        | VV   | 0.1655      | 8.88426     | 0.64114 | C22:5n-3 |
| 12       | 31.376        | VB   | 0.1514      | 37.22287    | 2.68621 | C22:6n-3 |
| Totals : |               |      |             | 1363.43559  | 98.3931 |          |

6 Warnings or Errors :

Warning : Calibration warnings (see calibration table listing)  
Warning : Invalid calibration curve, (C21:ISTD)  
Warning : Invalid calibration curve, (C20:4n-6)  
Warning : Invalid calibration curve, (C20:5n-3)  
Warning : Invalid calibration curve, (C22:5n-3)  
Warning : Invalid calibration curve, (C22:6n-3)

=====

Summed Peaks Report

=====

Signal 1: FID2 A, Front Signal

=====

Final Summed Peaks Report

=====

Signal 1: FID2 A, Front Signal

\*\*\* End of Report \*\*\*

Data File C:\CHEM32\1\DATA\SAMIAA FA\SAMIAA FA 2016-05-19 18-00-07\D6.D  
Sample Name: D6

```
=====
Acq. Operator   : Dr Mahdi                      Seq. Line :   24
Acq. Instrument : Instrument 1                  Location  : Vial 24
Injection Date  : 5/20/2016 10:25:43 AM        Inj       :    1
                                                Inj Volume: 1 µl
Acq. Method     : C:\CHEM32\1\DATA\SAMIAA FA\SAMIAA FA 2016-05-19 18-00-07\NAZIM FA3.M
Last changed    : 5/16/2016 4:23:12 PM by Dr Mahdi
Analysis Method : C:\CHEM32\1\METHODS\NAZIM FA3.M
Last changed    : 7/1/2016 11:11:06 AM by Dr Mahdi
                (modified after loading)
Additional Info : Peak(s) manually integrated
```

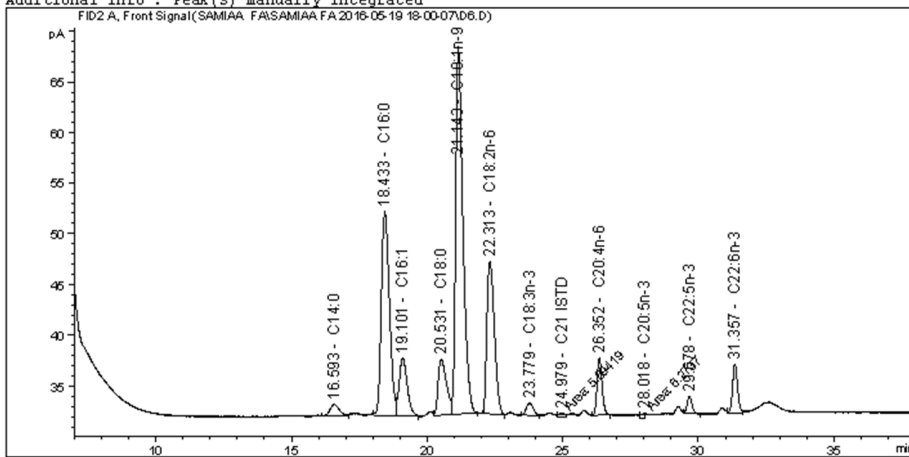

#### Area Percent Report

```
=====
Sorted By      :      Signal
Calib. Data Modified : 6/20/2016 4:41:54 PM
Multiplier:    :      1.0000
Dilution:      :      1.0000
Sample Amount: :      1.00000 [%] (not used in calc.)
Use Multiplier & Dilution Factor with ISTDs
```

Signal 1: FID2 A, Front Signal

| Peak # | RetTime [min] | Type | Width [min] | Area [pA*s] | Area %   | Name     |
|--------|---------------|------|-------------|-------------|----------|----------|
| 1      | 16.593        | VV   | 0.2866      | 26.96041    | 1.48002  | C14:0    |
| 2      | 18.433        | VV   | 0.2447      | 415.95798   | 22.83447 | C16:0    |
| 3      | 19.101        | VB   | 0.2432      | 116.78521   | 6.41105  | C16:1    |
| 4      | 20.531        | VV   | 0.2511      | 117.74133   | 6.46354  | C18:0    |
| 5      | 21.143        | VB   | 0.2191      | 668.48285   | 36.69710 | C18:1n-9 |
| 6      | 22.313        | BB   | 0.2307      | 287.37869   | 15.77597 | C18:2n-6 |
| 7      | 23.779        | EV   | 0.2037      | 20.38370    | 1.11899  | C18:3n-3 |
| 8      | 24.979        | MM   | 0.2641      | 5.69419     | 0.31259  | C21:1STD |
| 9      | 26.352        | VB   | 0.1552      | 72.45551    | 3.97753  | C20:4n-6 |

Instrument 1 7/1/2016 11:18:41 AM Dr Mahdi

Page 1 of 2

Data File C:\CHEM32\1\DATA\SAMIAA FA\SAMIAA FA 2016-05-19 18-00-07\D6.D  
Sample Name: D6

| Peak # | RetTime [min] | Type | Width [min] | Area [pA*s] | Area %  | Name     |
|--------|---------------|------|-------------|-------------|---------|----------|
| 10     | 28.018        | MM   | 0.1936      | 6.27370     | 0.34440 | C20:5n-3 |
| 11     | 29.678        | BV   | 0.1444      | 19.82045    | 1.08807 | C22:5n-3 |
| 12     | 31.357        | VV   | 0.1578      | 63.68897    | 3.49628 | C22:6n-3 |

Totals : 1821.62299 100.0000

6 Warnings or Errors :

Warning : Calibration warnings (see calibration table listing)  
Warning : Invalid calibration curve, (C21:ISTD)  
Warning : Invalid calibration curve, (C20:4n-6)  
Warning : Invalid calibration curve, (C20:5n-3)  
Warning : Invalid calibration curve, (C22:5n-3)  
Warning : Invalid calibration curve, (C22:6n-3)

=====

Summed Peaks Report

=====

Signal 1: FID2 A, Front Signal

=====

Final Summed Peaks Report

=====

Signal 1: FID2 A, Front Signal

\*\*\* End of Report \*\*\*

## Sample E=High fat diet (HFDC)

Data File C:\CHEM32\1\DATA\SAMIAA FA\SAMIAA FA 2016-05-19 18-00-07\E1.D  
Sample Name: E1

=====

|                                        |                    |
|----------------------------------------|--------------------|
| Acq. Operator : Dr Mahdi               | Seq. Line : 25     |
| Acq. Instrument : Instrument 1         | Location : Vial 25 |
| Injection Date : 5/20/2016 11:08:23 AM | Inj : 1            |
|                                        | Inj Volume : 1 µl  |

Acq. Method : C:\CHEM32\1\DATA\SAMIAA FA\SAMIAA FA 2016-05-19 18-00-07\NAZIM FA3.M  
Last changed : 5/16/2016 4:23:12 PM by Dr Mahdi  
Analysis Method : C:\CHEM32\1\METHODS\NAZIM FA3.M  
Last changed : 7/1/2016 11:11:06 AM by Dr Mahdi  
(modified after loading)

Additional Info : Peak(s) manually integrated

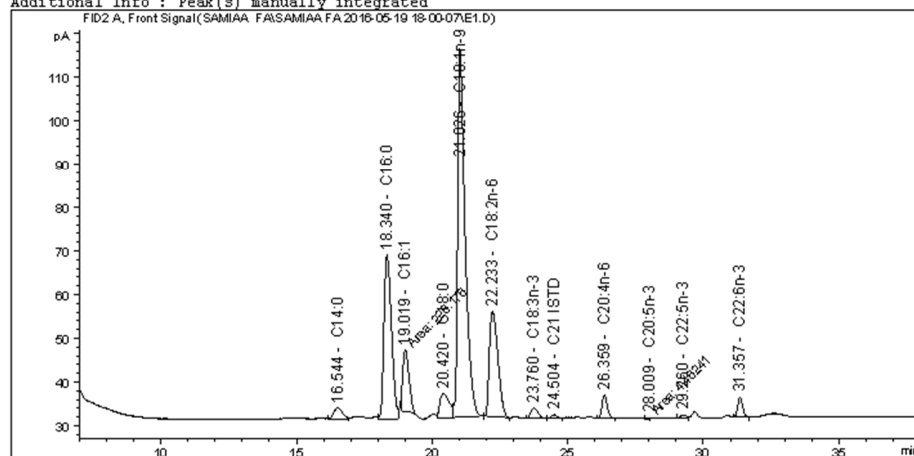

### Area Percent Report

Sorted By : Signal  
Calib. Data Modified : 6/20/2016 4:41:54 PM  
Multiplier: : 1.0000  
Dilution: : 1.0000  
Sample Amount: : 1.00000 [%] (not used in calc.)  
Use Multiplier & Dilution Factor with ISTDs

Signal 1: FID2 A, Front Signal

| Peak # | RetTime [min] | Type | Width [min] | Area [pA*s] | Area %   | Name     |
|--------|---------------|------|-------------|-------------|----------|----------|
| 1      | 16.544        | VV   | 0.2554      | 55.41048    | 1.60769  | C14:0    |
| 2      | 18.340        | VV   | 0.2279      | 722.91058   | 20.97467 | C16:0    |
| 3      | 19.019        | MM   | 0.2670      | 226.17630   | 6.56232  | C16:1    |
| 4      | 20.420        | VV   | 0.2856      | 133.74139   | 3.88040  | C18:0    |
| 5      | 21.026        | VB   | 0.2241      | 1590.51074  | 46.14739 | C18:1n-9 |
| 6      | 22.233        | BB   | 0.2571      | 525.67310   | 15.25198 | C18:2n-6 |
| 7      | 23.760        | EV   | 0.2073      | 39.68839    | 1.15153  | C18:3n-3 |
| 8      | 24.504        | VV   | 0.1685      | 10.71035    | 0.31075  | C21:1STD |
| 9      | 26.359        | VB   | 0.1560      | 70.23016    | 2.03767  | C20:4n-6 |

Instrument 1 7/1/2016 11:19:00 AM Dr Mahdi

Page 1 of 2

Data File C:\CHEM32\1\DATA\SAMIAA FA\SAMIAA FA 2016-05-19 18-00-07\E1.D  
Sample Name: E1

| Peak # | RetTime [min] | Type | Width [min] | Area [pA*s] | Area %  | Name     |
|--------|---------------|------|-------------|-------------|---------|----------|
| 10     | 28.009        | MM   | 0.1675      | 4.46241     | 0.12947 | C20:5n-3 |
| 11     | 29.260        | EV   | 0.1564      | 9.07513     | 0.26331 | C22:5n-3 |
| 12     | 31.357        | VB   | 0.1489      | 57.99989    | 1.68282 | C22:6n-3 |

Totals : 3446.58893 100.0000

#### 6 Warnings or Errors :

Warning : Calibration warnings (see calibration table listing)  
Warning : Invalid calibration curve, (C21:ISTD)  
Warning : Invalid calibration curve, (C20:4n-6)  
Warning : Invalid calibration curve, (C20:5n-3)  
Warning : Invalid calibration curve, (C22:5n-3)  
Warning : Invalid calibration curve, (C22:6n-3)

#### Summed Peaks Report

Signal 1: FID2 A, Front Signal

#### Final Summed Peaks Report

Signal 1: FID2 A, Front Signal

\*\*\* End of Report \*\*\*



Data File C:\CHEM32\1\DATA\SAMIAA FA\SAMIAA FA 2016-05-19 18-00-07\E2.D  
Sample Name: E2

=====

|                 |                                                                        |            |           |
|-----------------|------------------------------------------------------------------------|------------|-----------|
| Acq. Operator   | : Dr Mahdi                                                             | Seq. Line  | : 26      |
| Acq. Instrument | : Instrument 1                                                         | Location   | : Vial 26 |
| Injection Date  | : 5/20/2016 11:50:57 AM                                                | Inj        | : 1       |
|                 |                                                                        | Inj Volume | : 1 µl    |
| Acq. Method     | : C:\CHEM32\1\DATA\SAMIAA FA\SAMIAA FA 2016-05-19 18-00-07\NAZIM FA3.M |            |           |
| Last changed    | : 5/16/2016 4:23:12 PM by Dr Mahdi                                     |            |           |
| Analysis Method | : C:\CHEM32\1\METHODS\NAZIM FA3.M                                      |            |           |
| Last changed    | : 7/1/2016 11:11:06 AM by Dr Mahdi                                     |            |           |
|                 | (modified after loading)                                               |            |           |

Additional Info : Peak(s) manually integrated

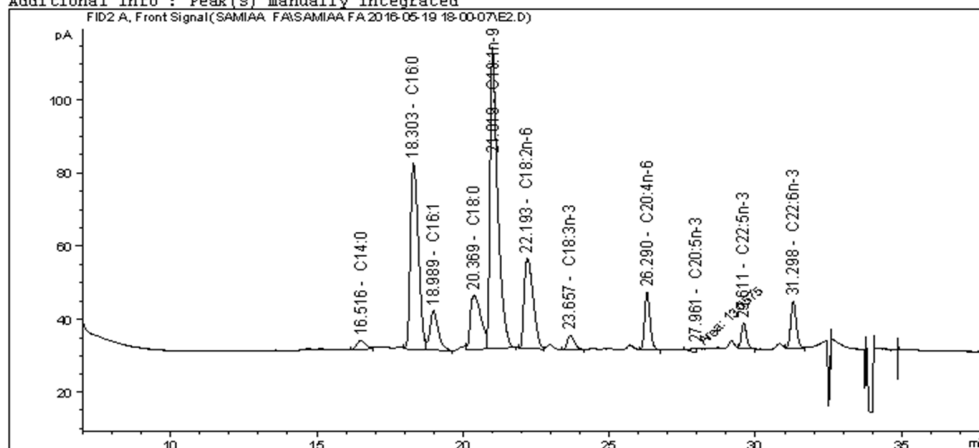

Area Percent Report

Sorted By : Signal  
Calib. Data Modified : 6/20/2016 4:41:54 PM  
Multiplier: : 1.0000  
Dilution: : 1.0000  
Sample Amount: : 1.00000 [%] (not used in calc.)  
Use Multiplier & Dilution Factor with ISTDs

Signal 1: FID2 A, Front Signal

| Peak # | RetTime [min] | Type | Width [min] | Area [pA*s] | Area %   | Name     |
|--------|---------------|------|-------------|-------------|----------|----------|
| 1      | 16.516        | VV   | 0.2492      | 52.42464    | 1.25951  | C14:0    |
| 2      | 18.303        | VV   | 0.2265      | 966.20026   | 23.21318 | C16:0    |
| 3      | 18.989        | VV   | 0.2357      | 210.78088   | 5.06406  | C16:1    |
| 4      | 20.369        | VV   | 0.2955      | 373.14078   | 8.96479  | C18:0    |
| 5      | 21.019        | VB   | 0.2161      | 1490.77502  | 35.81620 | C18:1n-9 |
| 6      | 22.193        | BV   | 0.2549      | 530.78961   | 12.75234 | C18:2n-6 |
| 7      | 23.657        | VV   | 0.2061      | 68.89052    | 1.65511  | C18:3n-3 |
| 8      | 24.600        |      | 0.0000      | 0.00000     | 0.00000  | C21 ISTD |
| 9      | 26.290        | VB   | 0.1524      | 201.86470   | 4.84984  | C20:4n-6 |

Instrument 1 7/1/2016 11:19:17 AM Dr Mahdi

Page 1 of 2

Data File C:\CHEM32\1\DATA\SAMIAA FA\SAMIAA FA 2016-05-19 18-00-07\E2.D  
Sample Name: E2

| Peak # | RetTime [min] | Type | Width [min] | Area [pA*s] | Area %  | Name     |
|--------|---------------|------|-------------|-------------|---------|----------|
| 10     | 27.961        | MM   | 0.1725      | 13.05747    | 0.31371 | C20:5n-3 |
| 11     | 29.611        | VB   | 0.1472      | 85.11295    | 2.04486 | C22:5n-3 |
| 12     | 31.298        | VB   | 0.1559      | 169.25574   | 4.06641 | C22:6n-3 |

Totals : 4162.29256 100.0000

#### 6 Warnings or Errors :

Warning : Calibration warnings (see calibration table listing)  
Warning : Calibrated compound(s) not found  
Warning : Invalid calibration curve, (C20:4n-6)  
Warning : Invalid calibration curve, (C20:5n-3)  
Warning : Invalid calibration curve, (C22:5n-3)  
Warning : Invalid calibration curve, (C22:6n-3)

#### Summed Peaks Report

Signal 1: FID2 A, Front Signal

#### Final Summed Peaks Report

Signal 1: FID2 A, Front Signal

\*\*\* End of Report \*\*\*

Data File C:\CHEM32\1\DATA\SAMIAA FA\SAMIAA FA 2016-05-19 18-00-07\E3.D  
Sample Name: E3

```
=====
Acq. Operator   : Dr Mahdi                      Seq. Line : 27
Acq. Instrument : Instrument 1                  Location  : Vial 27
Injection Date  : 5/20/2016 12:33:36 PM        Inj       : 1
                                                    Inj Volume: 1 ul
Acq. Method     : C:\CHEM32\1\DATA\SAMIAA FA\SAMIAA FA 2016-05-19 18-00-07\NAZIM FA3.M
Last changed    : 5/16/2016 4:23:12 PM by Dr Mahdi
Analysis Method : C:\CHEM32\1\METHODS\NAZIM FA3.M
Last changed    : 7/1/2016 11:20:28 AM by Dr Mahdi
                  (modified after loading)
Additional Info : Peak(s) manually integrated
```

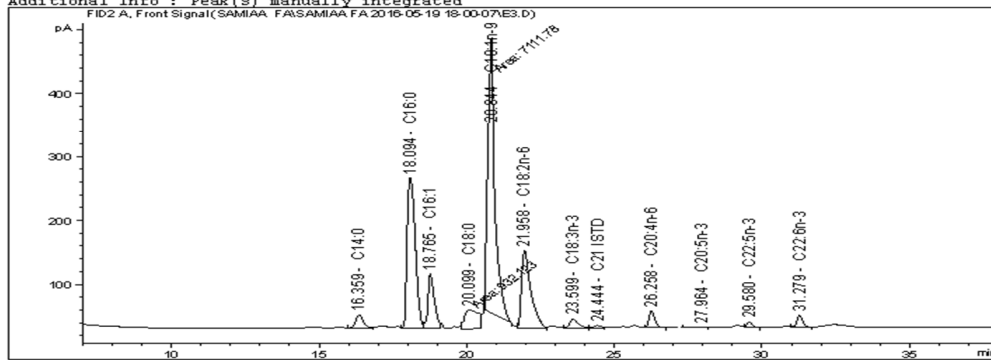

```
=====
                          Area Percent Report
=====
Sorted By      : Signal
Calib. Data Modified : 7/1/2016 11:20:27 AM
Multiplier:    : 1.0000
Dilution:      : 1.0000
Sample Amount: : 1.00000 [%] (not used in calc.)
Use Multiplier & Dilution Factor with ISTDs
```

Signal 1: FID2 A, Front Signal

| Peak # | RetTime [min] | Type | Width [min] | Area [pA*s] | Area %   | Name     |
|--------|---------------|------|-------------|-------------|----------|----------|
| 1      | 16.359        | VV   | 0.2100      | 374.60516   | 2.08975  | C14:0    |
| 2      | 18.094        | VV   | 0.2259      | 4504.98877  | 25.13129 | C16:0    |
| 3      | 18.765        | VV   | 0.1861      | 1267.27136  | 7.06953  | C16:1    |
| 4      | 20.099        | MM   | 0.5198      | 932.12256   | 5.19989  | C18:0    |
| 5      | 20.844        | MM   | 0.2747      | 7111.77588  | 39.67337 | C18:1n-9 |
| 6      | 21.958        | VV   | 0.2697      | 2643.18774  | 14.74515 | C18:2n-6 |
| 7      | 23.599        | VV   | 0.2466      | 266.95145   | 1.48920  | C18:3n-3 |
| 8      | 24.444        | VV   | 0.2208      | 56.90865    | 0.31747  | C21:1STD |
| 9      | 26.258        | VB   | 0.1791      | 361.31781   | 2.01563  | C20:4n-6 |

Instrument 1 7/1/2016 11:20:35 AM Dr Mahdi

Page 1 of 2

Data File C:\CHEM32\1\DATA\SAMIAA FA\SAMIAA FA 2016-05-19 18-00-07\E3.D  
Sample Name: E3

| Peak # | RetTime [min] | Type | Width [min] | Area [pA*s] | Area %  | Name     |
|--------|---------------|------|-------------|-------------|---------|----------|
| 10     | 27.964        | BV   | 0.2395      | 17.96986    | 0.10025 | C20:5n-3 |
| 11     | 29.580        | VV   | 0.1694      | 116.19919   | 0.64822 | C22:5n-3 |
| 12     | 31.279        | VB   | 0.1851      | 272.51688   | 1.52025 | C22:6n-3 |

Totals : 1.79258e4 100.0000

6 Warnings or Errors :

Warning : Calibration warnings (see calibration table listing)  
Warning : Invalid calibration curve, (C21:ISTD)  
Warning : Invalid calibration curve, (C20:4n-6)  
Warning : Invalid calibration curve, (C20:5n-3)  
Warning : Invalid calibration curve, (C22:5n-3)  
Warning : Invalid calibration curve, (C22:6n-3)

=====

# Summed Peaks Report

Signal 1: FID2 A, Front Signal

=====

# Final Summed Peaks Report

Signal 1: FID2 A, Front Signal

\*\*\* End of Report \*\*\*

Data File C:\CHEM32\1\DATA\SAMIAA FA\SAMIAA FA 2016-05-19 18-00-07\E4.D  
Sample Name: E4

```
=====
Acq. Operator   : Dr Mahdi                      Seq. Line :   28
Acq. Instrument : Instrument 1                  Location  : Vial 28
Injection Date  : 5/20/2016 1:16:10 PM         Inj       :    1
                                           Inj Volume: 1 µl
Acq. Method     : C:\CHEM32\1\DATA\SAMIAA FA\SAMIAA FA 2016-05-19 18-00-07\NAZIM FA3.M
Last changed    : 5/16/2016 4:23:12 PM by Dr Mahdi
Analysis Method : C:\CHEM32\1\METHODS\NAZIM FA3.M
Last changed    : 7/1/2016 11:21:00 AM by Dr Mahdi
                  (modified after loading)
Additional Info : Peak(s) manually integrated
```

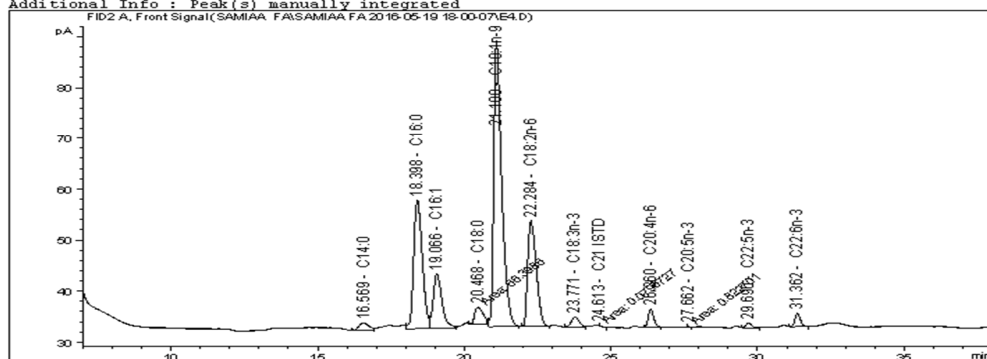

#### Area Percent Report

```
=====
Sorted By      : Signal
Calib. Data Modified : 7/1/2016 11:20:59 AM
Multiplier:    : 1.0000
Dilution:      : 1.0000
Sample Amount: : 1.00000 [%] (not used in calc.)
Use Multiplier & Dilution Factor with ISTDs
```

Signal 1: FID2 A, Front Signal

| Peak # | RetTime [min] | Type | Width [min] | Area [pA*s] | Area %   | Name     |
|--------|---------------|------|-------------|-------------|----------|----------|
| 1      | 16.569        | BV   | 0.2671      | 32.21893    | 1.32999  | C14:0    |
| 2      | 18.398        | VV   | 0.2403      | 514.16211   | 21.22454 | C16:0    |
| 3      | 19.066        | VV   | 0.2419      | 218.26752   | 9.01005  | C16:1    |
| 4      | 20.468        | MM   | 0.3236      | 66.39861    | 2.74093  | C18:0    |
| 5      | 21.100        | VB   | 0.2209      | 1042.84790  | 43.04862 | C18:1n-9 |
| 6      | 22.284        | BV   | 0.2438      | 419.95691   | 17.33576 | C18:2n-6 |
| 7      | 23.771        | BV   | 0.2211      | 35.90330    | 1.48208  | C18:3n-3 |
| 8      | 24.613        | MM   | 0.0217      | 7.96727e-2  | 0.00329  | C21:1STD |
| 9      | 26.360        | BB   | 0.1588      | 45.66700    | 1.88513  | C20:4n-6 |

Instrument 1 7/1/2016 11:21:13 AM Dr Mahdi

Page 1 of 2

Data File C:\CHEM32\1\DATA\SAMIAA FA\SAMIAA FA 2016-05-19 18-00-07\E4.D  
Sample Name: E4

| Peak # | RetTime [min] | Type | Width [min] | Area [pA*s] | Area %  | Name     |
|--------|---------------|------|-------------|-------------|---------|----------|
| 10     | 27.662        | MM   | 0.0763      | 8.22701e-1  | 0.03396 | C20:5n-3 |
| 11     | 29.690        | VV   | 0.1545      | 12.27688    | 0.50679 | C22:5n-3 |
| 12     | 31.362        | VV   | 0.1530      | 33.88722    | 1.39886 | C22:6n-3 |

Totals : 2422.48875 100.0000

6 Warnings or Errors :

Warning : Calibration warnings (see calibration table listing)  
Warning : Invalid calibration curve, (C21:ISTD)  
Warning : Invalid calibration curve, (C20:4n-6)  
Warning : Invalid calibration curve, (C20:5n-3)  
Warning : Invalid calibration curve, (C22:5n-3)  
Warning : Invalid calibration curve, (C22:6n-3)

=====

Summed Peaks Report

=====

Signal 1: FID2 A, Front Signal

=====

Final Summed Peaks Report

=====

Signal 1: FID2 A, Front Signal

\*\*\* End of Report \*\*\*

Data File C:\CHEM32\1\DATA\SAMIAA FA\SAMIAA FA 2016-05-19 18-00-07\E5E.D  
Sample Name: E5

```
=====
Acq. Operator   : Dr Mahdi                      Seq. Line :   29
Acq. Instrument : Instrument 1                  Location  : Vial 29
Injection Date  : 5/20/2016 1:58:51 PM          Inj       :    1
                                           Inj Volume: 1 ul
Acq. Method     : C:\CHEM32\1\DATA\SAMIAA FA\SAMIAA FA 2016-05-19 18-00-07\NAZIM FA3.M
Last changed    : 5/16/2016 4:23:12 PM by Dr Mahdi
Analysis Method : C:\CHEM32\1\METHODS\NAZIM FA3.M
Last changed    : 7/1/2016 11:21:00 AM by Dr Mahdi
                  (modified after loading)
Additional Info : Peak(s) manually integrated
```

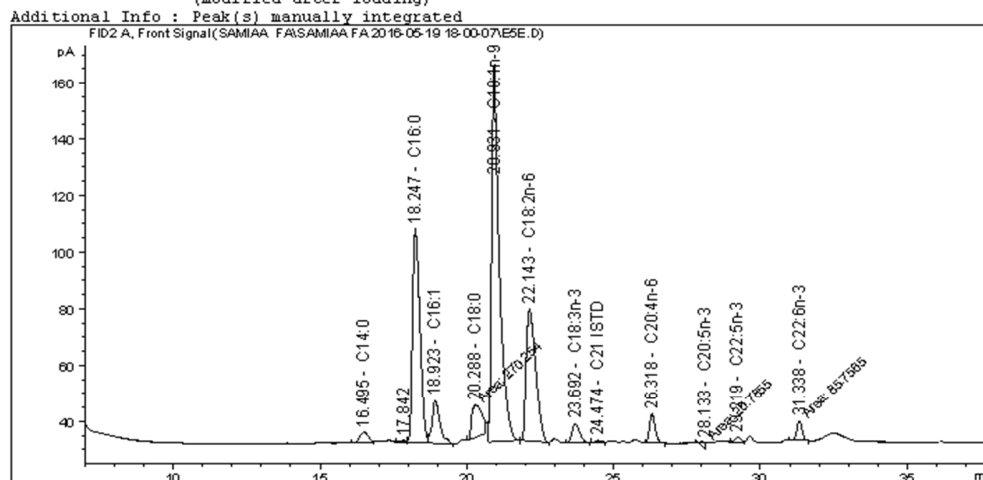

# Area Percent Report

```
=====
Sorted By      : Signal
Calib. Data Modified : 7/1/2016 11:20:59 AM
Multiplier:    : 1.0000
Dilution:      : 1.0000
Sample Amount: : 1.00000 [%] (not used in calc.)
Use Multiplier & Dilution Factor with ISTDs
```

Signal 1: FID2 A, Front Signal

| Peak # | RetTime [min] | Type | Width [min] | Area [pA*s] | Area %   | Name     |
|--------|---------------|------|-------------|-------------|----------|----------|
| 1      | 16.495        | VV   | 0.2319      | 70.10934    | 1.20226  | C14:0    |
| 2      | 18.247        | VV   | 0.2085      | 1323.27490  | 22.69206 | C16:0    |
| 3      | 18.923        | VV   | 0.2258      | 280.89462   | 4.81690  | C16:1    |
| 4      | 20.288        | MM   | 0.3909      | 270.25397   | 4.63443  | C18:0    |
| 5      | 20.931        | VB   | 0.2158      | 2410.37817  | 41.33415 | C18:1n-9 |
| 6      | 22.143        | BV   | 0.2682      | 1056.76660  | 18.12186 | C18:2n-6 |
| 7      | 23.692        | BB   | 0.2153      | 124.14899   | 2.12896  | C18:3n-3 |
| 8      | 24.474        | BV   | 0.1602      | 8.63970     | 0.14816  | C21 ISTD |
| 9      | 26.318        | VB   | 0.1612      | 137.79599   | 2.36298  | C20:4n-6 |

Instrument 1 7/1/2016 11:21:34 AM Dr Mahdi

Page 1 of 2

Data File C:\CHEM32\1\DATA\SAMIAA FA\SAMIAA FA 2016-05-19 18-00-07\ESE.D  
Sample Name: E5

| Peak # | RetTime [min] | Type | Width [min] | Area [pA*s] | Area %  | Name     |
|--------|---------------|------|-------------|-------------|---------|----------|
| 10     | 28.133        | MM   | 0.1457      | 20.78552    | 0.35644 | C20:5n-3 |
| 11     | 29.219        | VV   | 0.1937      | 35.40912    | 0.60721 | C22:5n-3 |
| 12     | 31.338        | MM   | 0.2020      | 85.75652    | 1.47059 | C22:6n-3 |

Totals : 5824.21346 99.8760

6 Warnings or Errors :

Warning : Calibration warnings (see calibration table listing)  
Warning : Invalid calibration curve, (C21 ISTD)  
Warning : Invalid calibration curve, (C20:4n-6)  
Warning : Invalid calibration curve, (C20:5n-3)  
Warning : Invalid calibration curve, (C22:5n-3)  
Warning : Invalid calibration curve, (C22:6n-3)

=====

# Summed Peaks Report

Signal 1: FID2 A, Front Signal

=====

# Final Summed Peaks Report

Signal 1: FID2 A, Front Signal

\*\*\* End of Report \*\*\*



Data File C:\CHEM32\1\DATA\SAMIAA FA\SAMIAA FA 2016-05-19 18-00-07\E6.D  
Sample Name: E6

=====

|                                       |                    |
|---------------------------------------|--------------------|
| Acq. Operator : Dr Mahdi              | Seq. Line : 30     |
| Acq. Instrument : Instrument 1        | Location : Vial 30 |
| Injection Date : 5/20/2016 2:41:21 PM | Inj : 1            |
|                                       | Inj Volume : 1 µl  |

Acq. Method : C:\CHEM32\1\DATA\SAMIAA FA\SAMIAA FA 2016-05-19 18-00-07\NAZIM FA3.M  
Last changed : 5/16/2016 4:23:12 PM by Dr Mahdi  
Analysis Method : C:\CHEM32\1\METHODS\NAZIM FA3.M  
Last changed : 7/1/2016 11:21:00 AM by Dr Mahdi  
(modified after loading)

Additional Info : Peak(s) manually integrated

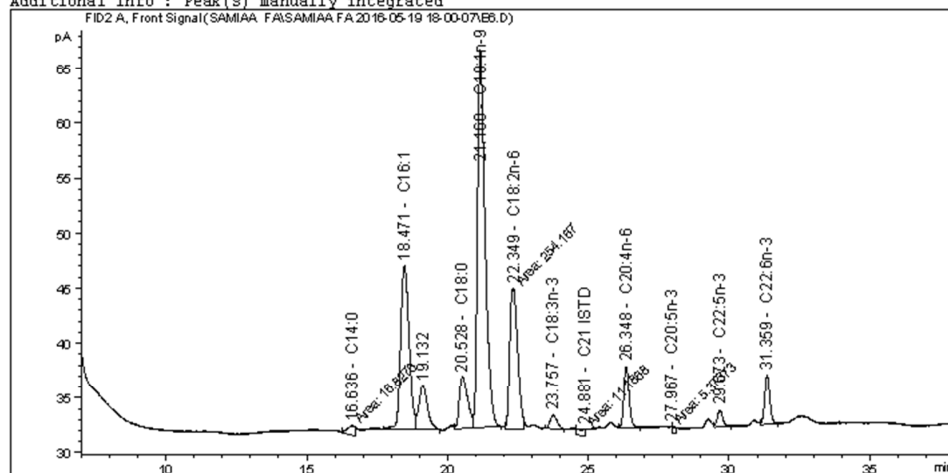

=====  
Area Percent Report  
=====

Sorted By : Signal  
Calib. Data Modified : 7/1/2016 11:20:59 AM  
Multiplier: : 1.0000  
Dilution: : 1.0000  
Sample Amount: : 1.00000 [%] (not used in calc.)  
Use Multiplier & Dilution Factor with ISTDs

Signal 1: FID2 A, Front Signal

| Peak # | RetTime [min] | Type | Width [min] | Area [pA*s] | Area %   | Name     |
|--------|---------------|------|-------------|-------------|----------|----------|
| 1      | 16.636        | MM   | 0.3182      | 16.82763    | 1.05186  | C14:0    |
| 2      | 18.100        |      | 0.0000      | 0.00000     | 0.00000  | C16:0    |
| 3      | 18.471        | EV   | 0.2451      | 311.00662   | 19.44031 | C16:1    |
| 4      | 20.528        | VV   | 0.2478      | 97.13303    | 6.07156  | C18:0    |
| 5      | 21.160        | VB   | 0.2293      | 642.95117   | 40.18940 | C18:1n-9 |
| 6      | 22.349        | MM   | 0.3294      | 254.16650   | 15.88736 | C18:2n-6 |
| 7      | 23.757        | EV   | 0.2058      | 21.44231    | 1.34031  | C18:3n-3 |
| 8      | 24.881        | MM   | 0.2818      | 11.18683    | 0.69926  | C21:1STD |
| 9      | 26.348        | VB   | 0.1613      | 75.02365    | 4.68956  | C20:4n-6 |

Instrument 1 7/1/2016 11:21:53 AM Dr Mahdi

Page 1 of 2

Data File C:\CHEM32\1\DATA\SAMIAA FA\SAMIAA FA 2016-05-19 18-00-07\E6.D  
Sample Name: E6

| Peak #   | RetTime [min] | Type | Width [min] | Area [pA*s] | Area %  | Name     |
|----------|---------------|------|-------------|-------------|---------|----------|
| 10       | 27.967        | MM   | 0.1515      | 5.37373     | 0.33590 | C20:5n-3 |
| 11       | 29.673        | VV   | 0.1607      | 20.87773    | 1.30502 | C22:5n-3 |
| 12       | 31.359        | VB   | 0.1511      | 57.25043    | 3.57859 | C22:6n-3 |
| Totals : |               |      |             | 1513.23964  | 94.5891 |          |

7 Warnings or Errors :

Warning : Calibration warnings (see calibration table listing)  
Warning : Calibrated compound(s) not found  
Warning : Invalid calibration curve, (C21:1STD)  
Warning : Invalid calibration curve, (C20:4n-6)  
Warning : Invalid calibration curve, (C20:5n-3)  
Warning : Invalid calibration curve, (C22:5n-3)  
Warning : Invalid calibration curve, (C22:6n-3)

=====

Summed Peaks Report

=====

Signal 1: FID2 A, Front Signal

=====

Final Summed Peaks Report

=====

Signal 1: FID2 A, Front Signal

\*\*\* End of Report \*\*\*

## Sample H= Normal chow diet (NC)

Data File C:\CHEM32\1\DATA\SAMIAA FA\SAMIAA FA 2016-05-19 18-00-07\H1.D  
Sample Name: H1

```
=====
Acq. Operator   : Dr Mahdi                      Seq. Line : 31
Acq. Instrument : Instrument 1                  Location  : Vial 31
Injection Date  : 5/20/2016 3:24:03 PM          Inj       : 1
                                           Inj Volume: 1 ul
Acq. Method    : C:\CHEM32\1\DATA\SAMIAA FA\SAMIAA FA 2016-05-19 18-00-07\NAZIM FA3.M
Last changed   : 5/16/2016 4:23:12 PM by Dr Mahdi
Analysis Method : C:\CHEM32\1\METHODS\NAZIM FA3.M
Last changed   : 7/1/2016 11:21:00 AM by Dr Mahdi
                (modified after loading)
Additional Info : Peak(s) manually integrated
```

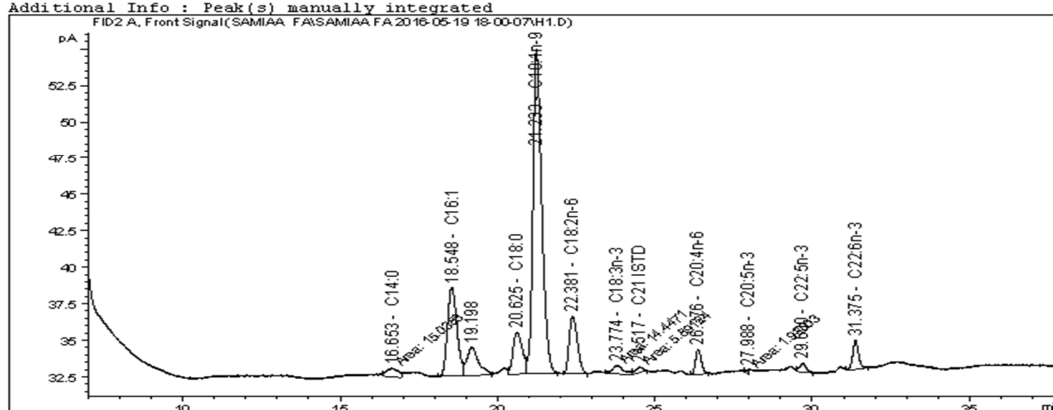

### Area Percent Report

```
=====
Sorted By      : Signal
Calib. Data Modified : 7/1/2016 11:20:59 AM
Multiplier:    : 1.0000
Dilution:      : 1.0000
Sample Amount: : 1.00000 [%] (not used in calc.)
Use Multiplier & Dilution Factor with ISTDs
```

Signal 1: FID2 A, Front Signal

| Peak # | RetTime [min] | Type | Width [min] | Area [pA*s] | Area %   | Name     |
|--------|---------------|------|-------------|-------------|----------|----------|
| 1      | 16.653        | MM   | 0.4341      | 15.03883    | 1.80926  | C14:0    |
| 2      | 18.100        |      | 0.0000      | 0.00000     | 0.00000  | C16:0    |
| 3      | 18.548        | BV   | 0.2477      | 127.79469   | 15.37443 | C16:1    |
| 4      | 20.625        | VV   | 0.2437      | 59.28229    | 7.13200  | C18:0    |
| 5      | 21.233        | VB   | 0.2283      | 429.50848   | 51.67233 | C18:1n-9 |
| 6      | 22.381        | BV   | 0.2149      | 71.09995    | 8.55373  | C18:2n-6 |
| 7      | 23.774        | MM   | 0.4154      | 14.44711    | 1.73807  | C18:3n-3 |
| 8      | 24.517        | MM   | 0.2663      | 5.89124     | 0.70875  | C21:1STD |
| 9      | 26.376        | BV   | 0.1533      | 21.77713    | 2.61991  | C20:4n-6 |

Instrument 1 7/1/2016 11:22:07 AM Dr Mahdi

Page 1 of 2

Data File C:\CHEM32\1\DATA\SAMIAA FA\SAMIAA FA 2016-05-19 18-00-07\H1.D  
Sample Name: H1

| Peak<br># | RetTime<br>[min] | Type | Width<br>[min] | Area<br>[pA*s] | Area<br>% | Name     |
|-----------|------------------|------|----------------|----------------|-----------|----------|
| 10        | 27.988           | MM   | 0.0959         | 1.92003        | 0.23099   | C20:5n-3 |
| 11        | 29.690           | VB   | 0.1670         | 8.40412        | 1.01106   | C22:5n-3 |
| 12        | 31.375           | VB   | 0.1599         | 26.30722       | 3.16491   | C22:6n-3 |

Totals : 781.47112 94.0154

7 Warnings or Errors :

Warning : Calibration warnings (see calibration table listing)  
Warning : Calibrated compound(s) not found  
Warning : Invalid calibration curve, (C21:1STD)  
Warning : Invalid calibration curve, (C20:4n-6)  
Warning : Invalid calibration curve, (C20:5n-3)  
Warning : Invalid calibration curve, (C22:5n-3)  
Warning : Invalid calibration curve, (C22:6n-3)

=====

Summed Peaks Report

=====

Signal 1: FID2 A, Front Signal

=====

Final Summed Peaks Report

=====

Signal 1: FID2 A, Front Signal

\*\*\* End of Report \*\*\*

Data File C:\CHEM32\1\DATA\SAMIAA FA\SAMIAA FA 2016-05-19 18-00-07\H2.D  
Sample Name: H2

=====

|                 |                        |            |           |
|-----------------|------------------------|------------|-----------|
| Acq. Operator   | : Dr Mahdi             | Seq. Line  | : 32      |
| Acq. Instrument | : Instrument 1         | Location   | : Vial 32 |
| Injection Date  | : 5/20/2016 4:06:37 PM | Inj        | : 1       |
|                 |                        | Inj Volume | : 1 ul    |

Acq. Method : C:\CHEM32\1\DATA\SAMIAA FA\SAMIAA FA 2016-05-19 18-00-07\NAZIM FA3.M  
Last changed : 5/16/2016 4:23:12 PM by Dr Mahdi  
Analysis Method : C:\CHEM32\1\METHODS\NAZIM FA3.M  
Last changed : 7/1/2016 11:21:00 AM by Dr Mahdi  
(modified after loading)

Additional Info : Peak(s) manually integrated

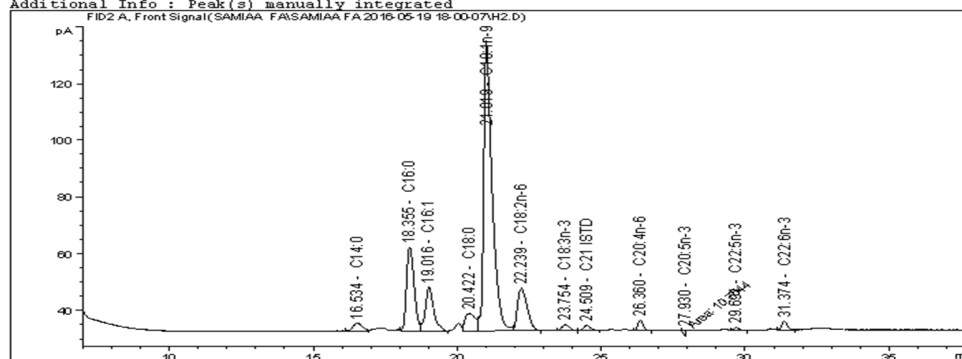

#### Area Percent Report

Sorted By : Signal  
Calib. Data Modified : 7/1/2016 11:20:59 AM  
Multiplier: : 1.0000  
Dilution: : 1.0000  
Sample Amount: : 1.00000 [%] (not used in calc.)  
Use Multiplier & Dilution Factor with ISTDs

Signal 1: FID2 A, Front Signal

| Peak # | RetTime [min] | Type | Width [min] | Area [pA*s] | Area %   | Name     |
|--------|---------------|------|-------------|-------------|----------|----------|
| 1      | 16.534        | BV   | 0.2662      | 61.46471    | 1.68901  | C14:0    |
| 2      | 18.355        | VV   | 0.2178      | 540.34381   | 14.84831 | C16:0    |
| 3      | 19.016        | VB   | 0.2343      | 306.31366   | 8.41731  | C16:1    |
| 4      | 20.422        | VV   | 0.2902      | 149.10374   | 4.09728  | C18:0    |
| 5      | 21.019        | VB   | 0.2391      | 2058.80615  | 56.57471 | C18:1n-9 |
| 6      | 22.239        | BB   | 0.2779      | 347.59464   | 9.55168  | C18:2n-6 |
| 7      | 23.754        | BV   | 0.2133      | 37.18278    | 1.02176  | C18:3n-3 |
| 8      | 24.509        | VB   | 0.1892      | 28.53251    | 0.78406  | C21:1STD |
| 9      | 26.360        | VB   | 0.1555      | 46.81867    | 1.28655  | C20:4n-6 |

Instrument 1 7/1/2016 11:22:23 AM Dr Mahdi

Page 1 of 2

Data File C:\CHEM32\1\DATA\SAMIAA FA\SAMIAA FA 2016-05-19 18-00-07\H2.D  
Sample Name: H2

| Peak<br># | RetTime<br>[min] | Type | Width<br>[min] | Area<br>[pA*s] | Area<br>% | Name     |
|-----------|------------------|------|----------------|----------------|-----------|----------|
| 10        | 27.930           | MM   | 0.0814         | 10.76440       | 0.29580   | C20:5n-3 |
| 11        | 29.691           | VB   | 0.1619         | 13.34007       | 0.36658   | C22:5n-3 |
| 12        | 31.374           | VB   | 0.1537         | 38.82728       | 1.06695   | C22:6n-3 |

Totals : 3639.09242 100.0000

6 Warnings or Errors :

Warning : Calibration warnings (see calibration table listing)  
Warning : Invalid calibration curve, (C21 ISTD)  
Warning : Invalid calibration curve, (C20:4n-6)  
Warning : Invalid calibration curve, (C20:5n-3)  
Warning : Invalid calibration curve, (C22:5n-3)  
Warning : Invalid calibration curve, (C22:6n-3)

=====

Summed Peaks Report

=====

Signal 1: FID2 A, Front Signal

=====

Final Summed Peaks Report

=====

Signal 1: FID2 A, Front Signal

\*\*\* End of Report \*\*\*

Data File C:\CHEM32\1\DATA\SAMIAA FA\SAMIAA FA 2016-05-19 18-00-07\H3.D  
Sample Name: H3

```
=====
Acq. Operator   : Dr Mahdi                      Seq. Line :   33
Acq. Instrument : Instrument 1                  Location  : Vial 33
Injection Date  : 5/20/2016 4:49:19 PM          Inj       :    1
                                           Inj Volume: 1 µl
Acq. Method     : C:\CHEM32\1\DATA\SAMIAA FA\SAMIAA FA 2016-05-19 18-00-07\NAZIM FA3.M
Last changed    : 5/16/2016 4:23:12 PM by Dr Mahdi
Analysis Method : C:\CHEM32\1\METHODS\NAZIM FA3.M
Last changed    : 7/1/2016 11:23:01 AM by Dr Mahdi
                  (modified after loading)
Additional Info : Peak(s) manually integrated
```

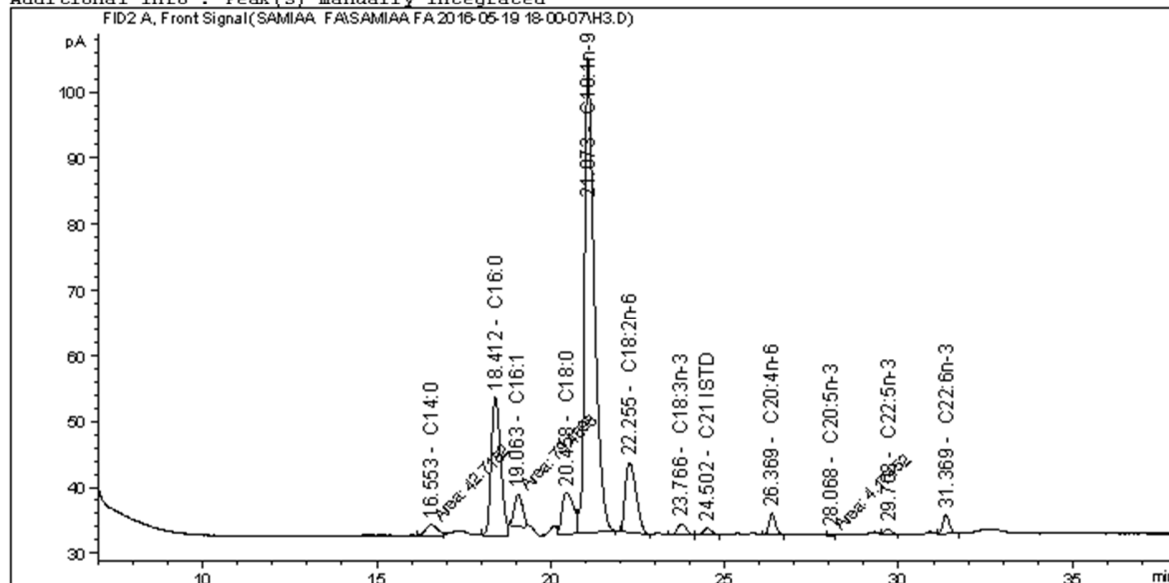

# Area Percent Report

```
Sorted By      : Signal
Calib. Data Modified : 7/1/2016 11:23:00 AM
Multiplier:     : 1.0000
Dilution:       : 1.0000
Sample Amount:  : 1.00000 [%] (not used in calc.)
Use Multiplier & Dilution Factor with ISTDs
```

Signal 1: FID2 A, Front Signal

| Peak # | RetTime [min] | Type | Width [min] | Area [pA*s] | Area %   | Name     |
|--------|---------------|------|-------------|-------------|----------|----------|
| 1      | 16.553        | MM   | 0.4099      | 42.71821    | 1.75229  | C14:0    |
| 2      | 18.412        | VV   | 0.2248      | 397.64929   | 16.31148 | C16:0    |
| 3      | 19.063        | MM   | 0.2687      | 79.46984    | 3.25983  | C16:1    |
| 4      | 20.458        | VV   | 0.2685      | 142.21829   | 5.83376  | C18:0    |
| 5      | 21.073        | VB   | 0.2331      | 1407.42651  | 57.73231 | C18:1n-9 |
| 6      | 22.255        | BB   | 0.2533      | 228.19640   | 9.36056  | C18:2n-6 |
| 7      | 23.766        | BV   | 0.2099      | 29.45240    | 1.20813  | C18:3n-3 |
| 8      | 24.502        | VV   | 0.1965      | 16.46512    | 0.67540  | C21:1STD |
| 9      | 26.369        | VV   | 0.1584      | 42.02425    | 1.72382  | C20:4n-6 |

Instrument 1 7/1/2016 11:23:32 AM Dr Mahdi

Page 1 of 2

Data File C:\CHEM32\1\DATA\SAMIAA FA\SAMIAA FA 2016-05-19 18-00-07\H3.D  
Sample Name: H3

| Peak # | RetTime [min] | Type | Width [min] | Area [pA*s] | Area %  | Name     |
|--------|---------------|------|-------------|-------------|---------|----------|
| 10     | 28.068        | MM   | 0.1880      | 4.17452     | 0.17124 | C20:5n-3 |
| 11     | 29.708        | VV   | 0.1619      | 10.72942    | 0.44012 | C22:5n-3 |
| 12     | 31.369        | VV   | 0.1558      | 37.32470    | 1.53105 | C22:6n-3 |

Totals : 2437.84895 100.0000

6 Warnings or Errors :

Warning : Calibration warnings (see calibration table listing)  
Warning : Invalid calibration curve, (C21:ISTD)  
Warning : Invalid calibration curve, (C20:4n-6)  
Warning : Invalid calibration curve, (C20:5n-3)  
Warning : Invalid calibration curve, (C22:5n-3)  
Warning : Invalid calibration curve, (C22:6n-3)

=====

Summed Peaks Report

=====

Signal 1: FID2 A, Front Signal

=====

Final Summed Peaks Report

=====

Signal 1: FID2 A, Front Signal

\*\*\* End of Report \*\*\*



Data File C:\CHEM32\1\DATA\SAMIAA FA\SAMIAA FA 2016-05-19 18-00-07\H4.D  
Sample Name: H4

```
=====
Acq. Operator   : Dr Mahdi                      Seq. Line :   34
Acq. Instrument : Instrument 1                  Location  : Vial 34
Injection Date  : 5/20/2016 5:31:53 PM          Inj       :    1
                                           Inj Volume: 1 µl
Acq. Method     : C:\CHEM32\1\DATA\SAMIAA FA\SAMIAA FA 2016-05-19 18-00-07\NAZIM FA3.M
Last changed    : 5/16/2016 4:23:12 PM by Dr Mahdi
Analysis Method : C:\CHEM32\1\METHODS\NAZIM FA3.M
Last changed    : 7/1/2016 11:23:01 AM by Dr Mahdi
                  (modified after loading)
Additional Info : Peak(s) manually integrated
```

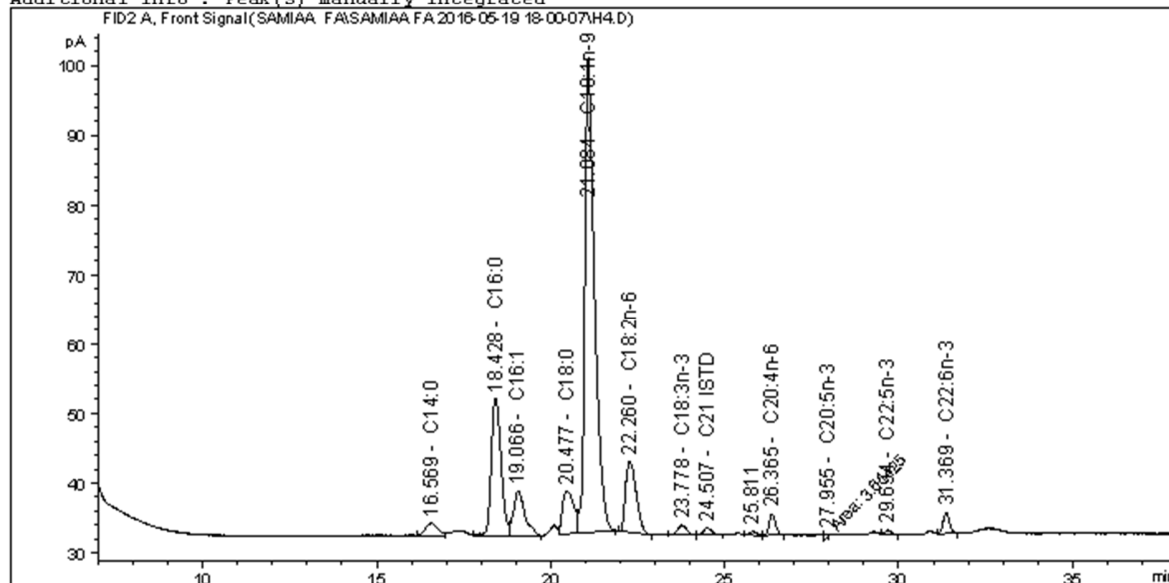

#### Area Percent Report

```
Sorted By      : Signal
Calib. Data Modified : 7/1/2016 11:23:00 AM
Multiplier:    : 1.0000
Dilution:      : 1.0000
Sample Amount: : 1.00000 [%] (not used in calc.)
Use Multiplier & Dilution Factor with ISTDs
```

Signal 1: FID2 A, Front Signal

| Peak # | RetTime [min] | Type | Width [min] | Area [pA*s] | Area %   | Name     |
|--------|---------------|------|-------------|-------------|----------|----------|
| 1      | 16.569        | BV   | 0.2815      | 42.20461    | 1.76668  | C14:0    |
| 2      | 18.428        | VV   | 0.2316      | 384.61475   | 16.09997 | C16:0    |
| 3      | 19.066        | VV   | 0.2703      | 148.60600   | 6.22065  | C16:1    |
| 4      | 20.477        | VV   | 0.2698      | 140.50418   | 5.88150  | C18:0    |
| 5      | 21.084        | VB   | 0.2302      | 1316.29004  | 55.09990 | C18:1n-9 |
| 6      | 22.260        | BB   | 0.2526      | 216.37669   | 9.05753  | C18:2n-6 |
| 7      | 23.778        | BV   | 0.2163      | 25.82303    | 1.08095  | C18:3n-3 |
| 8      | 24.507        | VV   | 0.1917      | 17.07506    | 0.71476  | C21 ISTD |
| 9      | 26.365        | VB   | 0.1576      | 40.04224    | 1.67617  | C20:4n-6 |

Instrument 1 7/1/2016 12:22:58 PM Dr Mahdi

Page 1 of 2

Data File C:\CHEM32\1\DATA\SAMIAA FA\SAMIAA FA 2016-05-19 18-00-07\H4.D  
Sample Name: H4

| Peak #   | RetTime [min] | Type | Width [min] | Area [pA*s] | Area %  | Name     |
|----------|---------------|------|-------------|-------------|---------|----------|
| 10       | 27.955        | MM   | 0.1789      | 3.61425     | 0.15129 | C20:5n-3 |
| 11       | 29.694        | VV   | 0.1550      | 8.28180     | 0.34668 | C22:5n-3 |
| 12       | 31.369        | VB   | 0.1500      | 38.55769    | 1.61402 | C22:6n-3 |
| Totals : |               |      |             | 2381.99034  | 99.7101 |          |

6 Warnings or Errors :

Warning : Calibration warnings (see calibration table listing)  
Warning : Invalid calibration curve, (C21:ISTD)  
Warning : Invalid calibration curve, (C20:4n-6)  
Warning : Invalid calibration curve, (C20:5n-3)  
Warning : Invalid calibration curve, (C22:5n-3)  
Warning : Invalid calibration curve, (C22:6n-3)

```

=====
                        Summed Peaks Report
=====

Signal 1: FID2 A, Front Signal
=====
                        Final Summed Peaks Report
=====

Signal 1: FID2 A, Front Signal
*** End of Report ***

```

Data File C:\CHEM32\1\DATA\SAMIAA FA\SAMIAA FA 2016-05-19 18-00-07\H5.D  
Sample Name: H5

=====

|                 |                                                                        |            |           |
|-----------------|------------------------------------------------------------------------|------------|-----------|
| Acq. Operator   | : Dr Mahdi                                                             | Seq. Line  | : 35      |
| Acq. Instrument | : Instrument 1                                                         | Location   | : Vial 35 |
| Injection Date  | : 5/20/2016 6:14:54 PM                                                 | Inj        | : 1       |
|                 |                                                                        | Inj Volume | : 1 ul    |
| Acq. Method     | : C:\CHEM32\1\DATA\SAMIAA FA\SAMIAA FA 2016-05-19 18-00-07\NAZIM FA3.M |            |           |
| Last changed    | : 5/16/2016 4:23:12 PM by Dr Mahdi                                     |            |           |
| Analysis Method | : C:\CHEM32\1\METHODS\NAZIM FA3.M                                      |            |           |
| Last changed    | : 7/1/2016 11:23:01 AM by Dr Mahdi                                     |            |           |
|                 | (modified after loading)                                               |            |           |

Additional Info : Peak(s) manually integrated

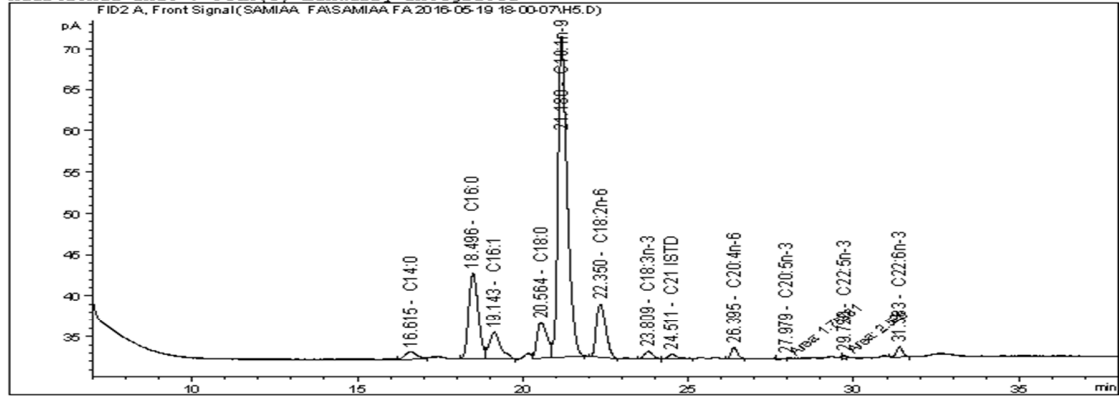

=====  
Area Percent Report  
=====

Sorted By : Signal  
Calib. Data Modified : 7/1/2016 11:23:00 AM  
Multiplier: : 1.0000  
Dilution: : 1.0000  
Sample Amount: : 1.00000 [%] (not used in calc.)  
Use Multiplier & Dilution Factor with ISTDs

Signal 1: FID2 A, Front Signal

| Peak # | RetTime [min] | Type | Width [min] | Area [pA*s] | Area %   | Name     |
|--------|---------------|------|-------------|-------------|----------|----------|
| 1      | 16.615        | BV   | 0.2983      | 22.66994    | 1.68252  | C14:0    |
| 2      | 18.496        | BV   | 0.2374      | 210.76010   | 15.64226 | C16:0    |
| 3      | 19.143        | VB   | 0.2827      | 77.27690    | 5.73536  | C16:1    |
| 4      | 20.564        | VV   | 0.2468      | 91.28044    | 6.77468  | C18:0    |
| 5      | 21.180        | VB   | 0.2356      | 753.56793   | 55.92854 | C18:1n-9 |
| 6      | 22.350        | BV   | 0.2325      | 128.99231   | 9.57359  | C18:2n-6 |
| 7      | 23.809        | VV   | 0.2068      | 16.00403    | 1.18779  | C18:3n-3 |
| 8      | 24.511        | VB   | 0.2002      | 8.90172     | 0.66067  | C21:1STD |
| 9      | 26.395        | BV   | 0.1601      | 17.61063    | 1.30703  | C20:4n-6 |

Instrument 1 7/1/2016 12:23:15 PM Dr Mahdi

Page 1 of 2

Data File C:\CHEM32\1\DATA\SAMIAA FA\SAMIAA FA 2016-05-19 18-00-07\H5.D  
 Sample Name: H5

| Peak # | RetTime [min] | Type | Width [min] | Area [pA*s] | Area %  | Name     |
|--------|---------------|------|-------------|-------------|---------|----------|
| 10     | 27.979        | MM   | 0.3711      | 1.78281     | 0.13232 | C20:5n-3 |
| 11     | 29.720        | MM   | 0.1068      | 2.52600     | 0.18748 | C22:5n-3 |
| 12     | 31.383        | VV   | 0.1536      | 16.00363    | 1.18776 | C22:6n-3 |

Totals : 1347.37643 100.0000

6 Warnings or Errors :

Warning : Calibration warnings (see calibration table listing)  
 Warning : Invalid calibration curve, (C21:1STD)  
 Warning : Invalid calibration curve, (C20:4n-6)  
 Warning : Invalid calibration curve, (C20:5n-3)  
 Warning : Invalid calibration curve, (C22:5n-3)  
 Warning : Invalid calibration curve, (C22:6n-3)

=====

Summed Peaks Report

=====

Signal 1: FID2 A, Front Signal

=====

Final Summed Peaks Report

=====

Signal 1: FID2 A, Front Signal

\*\*\* End of Report \*\*\*













Data File C:\CHEM32\1\DATA\SAMIAA FA\SAMIAA FA 2016-05-19 18-00-07\A3.D  
Sample Name: A3

```
=====
Acq. Operator   : Dr Mahdi                      Seg. Line :    3
Acq. Instrument : Instrument 1                  Location  : Vial 3
Injection Date  : 5/19/2016 7:28:21 PM          Inj       :    1
                                           Inj Volume: 1 µl
Acq. Method     : C:\CHEM32\1\DATA\SAMIAA FA\SAMIAA FA 2016-05-19 18-00-07\NAZIM FA3.M
Last changed    : 5/16/2016 4:23:12 PM by Dr Mahdi
Analysis Method : C:\CHEM32\1\METHODS\NAZIM FA3.M
Last changed    : 7/1/2016 11:11:06 AM by Dr Mahdi
                  (modified after loading)
Additional Info : Peak(s) manually integrated
```



#### Area Percent Report

```
=====
Sorted By      : Signal
Calib. Data Modified : 6/20/2016 4:41:54 PM
Multiplier:    : 1.0000
Dilution:      : 1.0000
Sample Amount:  : 1.00000 [%] (not used in calc.)
Use Multiplier & Dilution Factor with ISTDs
```

Signal 1: FID2 A, Front Signal

| Peak # | RetTime [min] | Type | Width [min] | Area [pA*s] | Area %   | Name     |
|--------|---------------|------|-------------|-------------|----------|----------|
| 1      | 16.500        | BV   | 0.2402      | 85.36057    | 1.35960  | C14:0    |
| 2      | 18.262        | VV   | 0.1970      | 993.03131   | 15.81668 | C16:0    |
| 3      | 18.934        | VV   | 0.2132      | 426.34695   | 6.79072  | C16:1    |
| 4      | 20.324        | MM   | 0.4122      | 257.65176   | 4.10379  | C18:0    |
| 5      | 20.936        | VB   | 0.2437      | 3489.70068  | 55.58284 | C18:1n-9 |
| 6      | 22.155        | BV   | 0.2837      | 701.67816   | 11.17611 | C18:2n-6 |
| 7      | 23.727        | VV   | 0.2157      | 71.34158    | 1.13631  | C18:3n-3 |
| 8      | 24.487        | VV   | 0.2063      | 37.10663    | 0.59102  | C21:1STD |
| 9      | 26.354        | VV   | 0.1600      | 115.74066   | 1.84348  | C20:4n-6 |

Instrument 1 7/1/2016 11:12:27 AM Dr Mahdi

Page 1 of 2

Data File C:\CHEM32\1\DATA\SAMIAA FA\SAMIAA FA 2016-05-19 18-00-07\A3.D  
Sample Name: A3

| Peak<br># | RetTime<br>[min] | Type | Width<br>[min] | Area<br>[pA*s] | Area<br>% | Name     |
|-----------|------------------|------|----------------|----------------|-----------|----------|
| 10        | 27.701           | MM   | 0.1232         | 13.71011       | 0.21837   | C20:5n-3 |
| 11        | 29.267           | VV   | 0.1621         | 11.56752       | 0.18424   | C22:5n-3 |
| 12        | 31.355           | VV   | 0.1474         | 75.14233       | 1.19684   | C22:6n-3 |

Totals : 6278.37827 100.0000

# 6 Warnings or Errors :

Warning : Calibration warnings (see calibration table listing)  
Warning : Invalid calibration curve, (C21 ISTD)  
Warning : Invalid calibration curve, (C20:4n-6)  
Warning : Invalid calibration curve, (C20:5n-3)  
Warning : Invalid calibration curve, (C22:5n-3)  
Warning : Invalid calibration curve, (C22:6n-3)

# Summed Peaks Report

Signal 1: FID2 A, Front Signal

# Final Summed Peaks Report

Signal 1: FID2 A, Front Signal  
\*\*\* End of Report \*\*\*

Data File C:\CHEM32\1\DATA\SAMIAA FA\SAMIAA FA 2016-05-19 18-00-07\A3.D  
Sample Name: A3

```
=====
Acq. Operator   : Dr Mahdi                      Seg. Line :    3
Acq. Instrument : Instrument 1                  Location  : Vial 3
Injection Date  : 5/19/2016 7:28:21 PM          Inj       :    1
                                           Inj Volume: 1 µl
Acq. Method     : C:\CHEM32\1\DATA\SAMIAA FA\SAMIAA FA 2016-05-19 18-00-07\NAZIM FA3.M
Last changed    : 5/16/2016 4:23:12 PM by Dr Mahdi
Analysis Method : C:\CHEM32\1\METHODS\NAZIM FA3.M
Last changed    : 7/1/2016 11:11:06 AM by Dr Mahdi
                  (modified after loading)
Additional Info : Peak(s) manually integrated
```

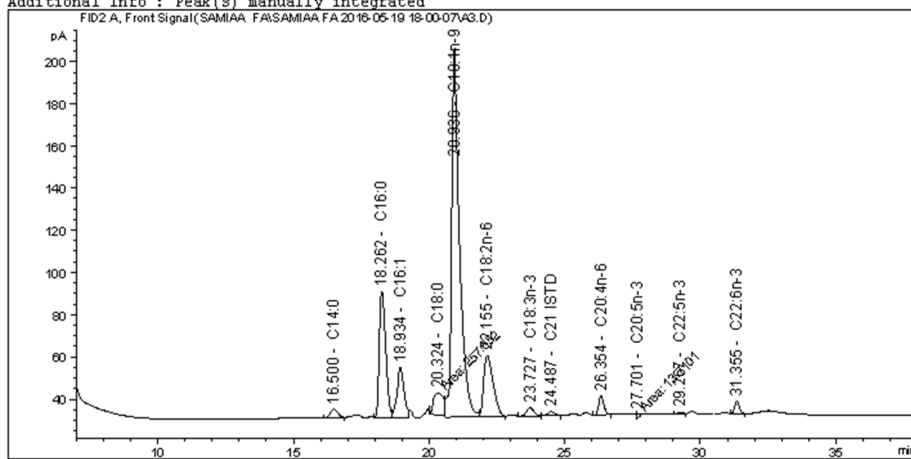

#### Area Percent Report

```
=====
Sorted By      : Signal
Calib. Data Modified : 6/20/2016 4:41:54 PM
Multiplier:    : 1.0000
Dilution:      : 1.0000
Sample Amount: : 1.00000 [%] (not used in calc.)
Use Multiplier & Dilution Factor with ISTDs
```

Signal 1: FID2 A, Front Signal

| Peak # | RetTime [min] | Type | Width [min] | Area [pA*s] | Area %   | Name     |
|--------|---------------|------|-------------|-------------|----------|----------|
| 1      | 16.500        | BV   | 0.2402      | 85.36057    | 1.35960  | C14:0    |
| 2      | 18.262        | VV   | 0.1970      | 993.03131   | 15.81668 | C16:0    |
| 3      | 18.934        | VV   | 0.2132      | 426.34695   | 6.79072  | C16:1    |
| 4      | 20.324        | MM   | 0.4122      | 257.65176   | 4.10379  | C18:0    |
| 5      | 20.936        | VB   | 0.2437      | 3489.70068  | 55.58284 | C18:1n-9 |
| 6      | 22.155        | BV   | 0.2837      | 701.67816   | 11.17611 | C18:2n-6 |
| 7      | 23.727        | VV   | 0.2157      | 71.34158    | 1.13631  | C18:3n-3 |
| 8      | 24.487        | VV   | 0.2063      | 37.10663    | 0.59102  | C21:ISTD |
| 9      | 26.354        | VV   | 0.1600      | 115.74066   | 1.84348  | C20:4n-6 |

Instrument 1 7/1/2016 11:12:27 AM Dr Mahdi

Page 1 of 2

Data File C:\CHEM32\1\DATA\SAMIAA FA\SAMIAA FA 2016-05-19 18-00-07\A3.D  
Sample Name: A3

| Peak # | RetTime [min] | Type | Width [min] | Area [pA*s] | Area %  | Name     |
|--------|---------------|------|-------------|-------------|---------|----------|
| 10     | 27.701        | MM   | 0.1232      | 13.71011    | 0.21837 | C20:5n-3 |
| 11     | 29.267        | VV   | 0.1621      | 11.56752    | 0.18424 | C22:5n-3 |
| 12     | 31.355        | VV   | 0.1474      | 75.14233    | 1.19684 | C22:6n-3 |

Totals : 6278.37827 100.0000

6 Warnings or Errors :

Warning : Calibration warnings (see calibration table listing)  
Warning : Invalid calibration curve, (C21:1STD)  
Warning : Invalid calibration curve, (C20:4n-6)  
Warning : Invalid calibration curve, (C20:5n-3)  
Warning : Invalid calibration curve, (C22:5n-3)  
Warning : Invalid calibration curve, (C22:6n-3)

=====

Summed Peaks Report

=====

Signal 1: FID2 A, Front Signal

=====

Final Summed Peaks Report

=====

Signal 1: FID2 A, Front Signal

\*\*\* End of Report \*\*\*
